# Supplementary material
Source: PubMed Central journal article supplement (PMC4284583)
Supplement: pnas.1416991111.sapp.pdf [file pnas.1416991111.sapp.pdf]

# Supplementary information

---

## Prehistoric genomes reveal the genetic foundation and cost of horse domestication

Mikkel Schubert<sup>a,1</sup>, Hákon Jónsson<sup>a,1</sup>, Dan Chang<sup>b,1</sup>, Clio Der Sarkissian<sup>a</sup>, Luca Ermini<sup>a</sup>, Aurélien Ginolhac<sup>a</sup>, Anders Albrechtsen<sup>c</sup>, Isabelle Dupanloup<sup>d,e</sup>, Adrien Foucal<sup>d,e</sup>, Bent Petersen<sup>f</sup>, Matteo Fumagalli<sup>g</sup>, Maanasa Raghavan<sup>a</sup>, Andaine Seguin-Orlando<sup>a,h</sup>, Thorfinn Korneliussen<sup>a</sup>, Amhed M.V. Velazquez<sup>a</sup>, Jesper Stenderup<sup>a</sup>, Cindi A. Hoover<sup>i</sup>, Carl-Johan Rubin<sup>j</sup>, Ahmed H. Alfarhan<sup>k</sup>, Saleh A. Alquraishi<sup>k</sup>, Khaled A.S. Al-Rasheid<sup>k</sup>, David E. MacHugh<sup>l,m</sup>, Ted Kalbfleisch<sup>n</sup>, James N. MacLeod<sup>o</sup>, Edward M Rubin<sup>i</sup>, Thomas Sicheritz-Ponten<sup>f</sup>, Leif Andersson<sup>l</sup>, Michael Hofreiter<sup>p</sup>, Tomas Marques-Bonet<sup>q,r</sup>, M Thomas P Gilbert<sup>a</sup>, Rasmus Nielsen<sup>s</sup>, Laurent Excoffier<sup>d,e</sup>, Eske Willerslev<sup>a</sup>, Beth Shapiro<sup>b</sup>, Ludovic Orlando<sup>a,2</sup>.

<sup>a</sup>Centre for GeoGenetics, Natural History Museum of Denmark, University of Copenhagen, 1350K Copenhagen, Denmark; <sup>b</sup>Department of Ecology and Evolutionary Biology, University of California, Santa Cruz, CA 95064; <sup>c</sup>The Bioinformatics Centre, Department of Biology, University of Copenhagen, 2200N Copenhagen, Denmark; <sup>d</sup>Institute of Ecology and Evolution, University of Berne, 3012 Berne, Switzerland; <sup>e</sup>Swiss Institute of Bioinformatics, 1015 Lausanne, Switzerland; <sup>f</sup>Center for Biological Sequence Analysis, Department of Systems Biology, Technical University of Denmark, DK-2800 Lyngby, Denmark; <sup>g</sup>UCL Genetics Institute, Department of Genetics, Evolution, and Environment, University College London, London WC1E 6BT, United Kingdom; <sup>h</sup>National High-Throughput DNA Sequencing Center, University of Copenhagen, 1353K Copenhagen, Denmark; <sup>i</sup>Department of Energy Joint Genome Institute, Walnut Creek, CA 94598; <sup>j</sup>Science for Life Laboratory, Department of Medical Biochemistry and Microbiology, Uppsala University, SE-751 23 Uppsala, Sweden; <sup>k</sup>Zoology Department, College of Science, King Saud University, Riyadh 11451, Saudi Arabia; <sup>l</sup>Animal Genomics Laboratory, UCD School of Agriculture and Food Science, University College Dublin, Belfield, Dublin 4, Ireland; <sup>m</sup>UCD Conway Institute of Biomolecular and Biomedical Research, University College Dublin, Dublin 4, Ireland; <sup>n</sup>Biochemistry and Molecular Biology, School of Medicine, University of Louisville, Louisville, KY 40292; <sup>o</sup>Department of Veterinary Science, Gluck Equine Research Center, University of Kentucky, Lexington, KY 40546; <sup>p</sup>Institute for Biochemistry and Biology, Faculty for Mathematics and Natural Sciences, University of Potsdam, 14476 Potsdam, Germany; <sup>q</sup>Institució Catalana de Recerca i Estudis Avançats, Institut de Biologia Evolutiva (Universitat Pompeu Fabra/Consejo Superior de Investigaciones Científicas), 08003 Barcelona, Spain; <sup>r</sup>Centro Nacional de Análisis Genómico, 08028 Barcelona, Spain; and <sup>s</sup>Departments of Integrative Biology and Statistics, University of California, Berkeley, CA 94720

<sup>1</sup> These authors contributed equally to this work.

<sup>2</sup> To whom correspondence should be addressed. E-mail: [Lorlando@snm.ku.dk](mailto:Lorlando@snm.ku.dk)

## Table of contents

|                                                                                                               |           |
|---------------------------------------------------------------------------------------------------------------|-----------|
| Table of contents .....                                                                                       | 2         |
| Author contributions .....                                                                                    | 4         |
| Supplementary Figures .....                                                                                   | 5         |
| Supplementary Tables .....                                                                                    | 7         |
| <b>S1 Genome sequencing.....</b>                                                                              | <b>9</b>  |
| S1.1 Sample information.....                                                                                  | 9         |
| S1.2 DNA sequencing.....                                                                                      | 9         |
| S1.3 Read alignment against reference genomes.....                                                            | 12        |
| S1.4 Sample-wise error rates .....                                                                            | 15        |
| S1.5 <i>Post-mortem</i> damage of pre-domesticated samples.....                                               | 17        |
| S1.6 Average genomic-wide heterozygosity estimates .....                                                      | 19        |
| S1.7 Functional categorization of SNP variation.....                                                          | 20        |
| S1.8 Microbial profiling of ancient horse DNA extracts.....                                                   | 22        |
| S1.8.1 <i>Background</i> .....                                                                                | 22        |
| S1.8.2 <i>Results</i> .....                                                                                   | 23        |
| <b>S2 Phylogenetic and demographic analyses.....</b>                                                          | <b>30</b> |
| S2.1 Phylogenetic inference from mitochondrial sequences .....                                                | 30        |
| S2.2 Median graph of chromosome Y sequences .....                                                             | 33        |
| S2.3 Principal Component Analysis and Procrustes Analysis .....                                               | 34        |
| S2.4 Functional assessment of candidate SNPs .....                                                            | 36        |
| S2.5 Phylogenetic inference using super-matrix of nuclear coding sequences.....                               | 39        |
| S2.6 Dating of the most recent common ancestors .....                                                         | 40        |
| S2.7 Gene flow between pre-domesticated and modern horses .....                                               | 43        |
| S2.7.1 <i>Background</i> .....                                                                                | 43        |
| S2.7.2 <i>Results</i> .....                                                                                   | 43        |
| S2.7.3 <i>Proportion of the genome of domesticated horses deriving from admixture</i> .....                   | 45        |
| S2.8 Population tree and split times .....                                                                    | 46        |
| S2.8.1 <i>Population Tree using TreeMix</i> .....                                                             | 46        |
| S2.8.2 <i>Population split times</i> .....                                                                    | 49        |
| S2.9 Joint demographic inference using $\partial a \partial i$ .....                                          | 56        |
| S2.10 Demographic reconstruction based on the nuclear genome information .....                                | 58        |
| <b>S3 Genetic load and inbreeding .....</b>                                                                   | <b>61</b> |
| S3.1 Genetic load in the genomes of modern and pre-domesticated samples .....                                 | 61        |
| S3.1.1 <i>Comparison between modern and pre-domesticated samples</i> .....                                    | 61        |
| S3.1.2 <i>Comparison of the Przewalski's horse with domestic breeds</i> .....                                 | 66        |
| S3.2 Estimation of inbreeding in domestic and wild horses.....                                                | 68        |
| <b>S4 Selection scans .....</b>                                                                               | <b>72</b> |
| S4.1 Screening for positive selection using PAML .....                                                        | 72        |
| S4.2 Screening for selective sweeps using $\theta w$ and Tajima's D statistic .....                           | 74        |
| S4.2.1 <i>Overall methodology</i> .....                                                                       | 74        |
| S4.2.2 <i>Analysis I: Determining outliers in <math>\theta w</math> log-ratio and Tajima's D values</i> ..... | 74        |
| S4.2.3 <i>Quality controls</i> .....                                                                          | 80        |
| S4.2.4 <i>Analysis II: Adding the Icelandic (P5782) genome to the set of domestic horse breeds</i><br>80      |           |
| S4.2.5 <i>Analysis III: Comparing the Przewalski's horse to domestic horse breeds</i> .....                   | 84        |
| S4.2.6 <i>Detecting outlier genes in smaller regions</i> .....                                                | 85        |
| S4.3 Selective sweep scan with coalescent and SNP BeadChip genotypes.....                                     | 89        |
| S4.3.1 <i>Background</i> .....                                                                                | 89        |
| S4.3.2 <i>Data processing and model training</i> .....                                                        | 90        |

|                   |                                                   |            |
|-------------------|---------------------------------------------------|------------|
| S4.3.3            | <i>Selection scan setup</i>                       | 91         |
| S4.3.4            | <i>Gene annotation and enrichment</i>             | 92         |
| S4.3.5            | <i>Results</i>                                    | 92         |
| S4.4              | Selective sweep scans using a Hidden Markov Model | 100        |
| S4.4.1            | <i>Background</i>                                 | 100        |
| S4.4.2            | <i>Initial data processing</i>                    | 100        |
| S4.4.3            | <i>Model training and coalescent simulation</i>   | 101        |
| S4.4.4            | <i>Selective sweep scan with HMM</i>              | 103        |
| S4.4.5            | <i>Results</i>                                    | 103        |
| S4.5              | Comparison between different selection scans      | 109        |
| S4.5.1            | <i>Pairwise comparisons</i>                       | 109        |
| S4.6              | Weighted selection of candidate genes             | 110        |
| <b>References</b> |                                                   | <b>116</b> |

## Author contributions

- LO initially conceived and headed the project.
- BS provided samples.
- AHA, SAA, KAR, DEM, TMB, LEx, TG, EW, BS and LO provided reagents and material.
- MR, ASO, JS, CAH and LO did ancient DNA extractions and constructed Illumina ancient DNA libraries.
- MS, AG and BP performed read mapping, variant calling and generated genome alignments.
- LO did phylogenetic reconstruction and dating on mitochondrial genomes.
- HJ and AG estimated levels of inbreeding.
- AA estimated sequencing error rates and performed admixture tests based on the D-statistics.
- AG did Pairwise-Sequential Markovian Coalescent inference analyses, and examined DNA damage patterns, with input from MS.
- MS did phylogenomic reconstructions and dating on nuclear and Y-chromosomal DNA, and aggregated selection scan results.
- MS did PAML analyses, with input from HJ.
- HJ did TreeMix analyses.
- LO and AG estimated population divergence using F-statistics.
- MF performed the  $\partial a\partial i$  analyses.
- AG and MS did the functional assessment of SNPs, and carried out functional enrichment.
- CDS and LEr did metagenomic profiling.
- MS, HJ, AF, ID, LEx performed genetic load analyses, with input from LO.
- AMVV did principal component analyses.
- HJ, AG and TK did the selection scans based on theta-Watterson estimates, with input from RN.
- DC and BS did the selection scans based on HMM and SNP BeadChip genotypes.
- MS, HJ, DC, CDS, LEr, AG, BS and LO wrote the Supplemental Note.
- LO wrote the manuscript, with input from MS, HJ, BS, DC, EW, KAR and all co-authors.

## Supplementary Figures

|                                                                                                                                                                                                                                                               |    |
|---------------------------------------------------------------------------------------------------------------------------------------------------------------------------------------------------------------------------------------------------------------|----|
| Supplementary Figure S1. Length distribution of mapped reads from pre-domesticated horses.....                                                                                                                                                                | 15 |
| Supplementary Figure S2. Error rates of wild and domestic horses without quality filtering .....                                                                                                                                                              | 16 |
| Supplementary Figure S3. Error rates of wild and domestic horses with quality filtering .....                                                                                                                                                                 | 17 |
| Supplementary Figure S4. Post-mortem DNA damage and fragmentation patterns of pre-domesticated horses .....                                                                                                                                                   | 18 |
| Supplementary Figure S5. Model parameters estimated by mapDamage2.0 .....                                                                                                                                                                                     | 19 |
| Supplementary Figure S6. Intersection of SNPs called for domestic and wild horses .....                                                                                                                                                                       | 22 |
| Supplementary Figure S7. Relative abundances of microbial classes in ancient horse DNA extracts .....                                                                                                                                                         | 24 |
| Supplementary Figure S8. Hierarchical clustering of Manhattan distances between microbial DNA profiles at the genus level in ancient horse extracts (10,000 bootstraps).....                                                                                  | 25 |
| Supplementary Figure S9. Principal Coordinate Analysis of Bray-Curtis distances between microbial DNA profiles at the genus level in ancient horse extracts.....                                                                                              | 26 |
| Supplementary Figure S10. Principal Coordinate Analysis of Bray-Curtis distances between microbial DNA profiles at the genus level in various human associated microbiomes, soils, and the ancient horse extracts CGG10022 and CGG10023 .....                 | 28 |
| Supplementary Figure S11. Heatmap showing relative abundances of microbial genera in ancient horse DNA extracts .....                                                                                                                                         | 28 |
| Supplementary Figure S12. Bayesian phylogenetic reconstruction using MrBayes.....                                                                                                                                                                             | 31 |
| Supplementary Figure S13. BEAST phylogenetic reconstruction .....                                                                                                                                                                                             | 32 |
| Supplementary Figure S14. Bayesian skyline demographic profile.....                                                                                                                                                                                           | 33 |
| Supplementary Figure S15. Median joining network of chrY sequences .....                                                                                                                                                                                      | 34 |
| Supplementary Figure S16. PCA analysis of pre-domesticated and McCue et al. horses.....                                                                                                                                                                       | 35 |
| Supplementary Figure S17. PCA analysis of pre-domesticated and Petersen et al. horses.....                                                                                                                                                                    | 35 |
| Supplementary Figure S18. Phylogenetic tree of domesticated and wild horses .....                                                                                                                                                                             | 40 |
| Supplementary Figure S19. Chronogram of wild and domesticated horses.....                                                                                                                                                                                     | 41 |
| Supplementary Figure S20. Relaxed chronogram of wild and domesticated horses .....                                                                                                                                                                            | 42 |
| Supplementary Figure S21. TreeMix population tree with no migration edges, considering each individual as a separate population. ....                                                                                                                         | 47 |
| Supplementary Figure S22. TreeMix population tree with no migration edges, by using the Nordic (Icelandic (unnamed), Icelandic (P5782) and the Norwegian Fjord) and non-Nordic (Arabian, the Standardbred and Twilight) grouping for the domestic breeds..... | 48 |
| Supplementary Figure S23. TreeMix population tree with 1 migration edge, by using the Nordic (Icelandic (unnamed), Icelandic (P5782) and the Norwegian Fjord) and non-Nordic (Arabian, the Standardbred and Twilight) grouping for the domestic breeds.....   | 48 |
| Supplementary Figure S24. Posterior distributions of population split times.....                                                                                                                                                                              | 51 |
| Supplementary Figure S25. Sensitivity of Population split times to migration rates .....                                                                                                                                                                      | 53 |
| Supplementary Figure S26. Population models for the $\partial a \partial i$ analysis.....                                                                                                                                                                     | 57 |
| Supplementary Figure S27. Observed and modeled spectra from $\partial a \partial i$ analyses .....                                                                                                                                                            | 58 |
| Supplementary Figure S28. Demographic fluctuations over the last 2 millions years .....                                                                                                                                                                       | 60 |
| Supplementary Figure S29 Mutations stratified by GERP scores and annotation .....                                                                                                                                                                             | 62 |
| Supplementary Figure S30 Genetic load calculated for sites with / without transitions.....                                                                                                                                                                    | 63 |
| Supplementary Figure S31 Distribution of genetic loads.....                                                                                                                                                                                                   | 63 |
| Supplementary Figure S32 QQ-plots of genetic load vs CGG10022 / Przewalski's horse (all sites) .....                                                                                                                                                          | 64 |
| Supplementary Figure S33 QQ-plots of genetic load scores vs CGG10022 / Przewalski's horse (tv only).....                                                                                                                                                      | 65 |
| Supplementary Figure S34 Odds-ratios vs CGG10022 for GERP scores across homo/heterozygous sites.....                                                                                                                                                          | 66 |
| Supplementary Figure S35. GERP scores for CGG10022.....                                                                                                                                                                                                       | 67 |
| Supplementary Figure S36. Heterozygosity of genomic regions for domestic horses .....                                                                                                                                                                         | 69 |

|                                                                                                                                                                                                                                                                 |     |
|-----------------------------------------------------------------------------------------------------------------------------------------------------------------------------------------------------------------------------------------------------------------|-----|
| Supplementary Figure S37. Heterozygosity of genomic regions for wild horses.....                                                                                                                                                                                | 70  |
| Supplementary Figure S38. Inbreeding coverage estimates for domestic and wild horses .....                                                                                                                                                                      | 71  |
| Supplementary Figure S39. Correlation between $\theta_w$ log values with or without transitions for pre-domesticated horses .....                                                                                                                               | 75  |
| Supplementary Figure S40. Q-Q plots for the normal approximation to the local average of the summary statistics ( $\theta_w$ log-ratio and Tajima's D) in the comparison between pre-domestic horses and domesticated horses (excluding Icelandic (P5782))..... | 76  |
| Supplementary Figure S41. Screening for selective sweeps using the $\theta_w$ log-ratio between pre-domesticated horses (set1) and domestic horses (set) and Tajima's D values among domestic .....                                                             | 77  |
| Supplementary Figure S42. Autocorrelation plots of all $\theta_w$ log-ratios (left) and mean $\theta_w$ log-ratios retained per peak (right) .....                                                                                                              | 80  |
| Supplementary Figure S43. Q-Q plots for the normal approximation to the local average of the summary statistics ( $\theta_w$ log-ratio and Tajima's D) in the comparison between pre-domesticated horses and the domestic horses.....                           | 81  |
| Supplementary Figure S44. Screening for selective sweeps using the $\theta_w$ log-ratio between pre-domesticated (set1) and domestic horses (set2) including Icelandic (P5782), 5% significant threshold.....                                                   | 82  |
| Supplementary Figure S45. Q-Q plots for the normal approximation to the local average of the summary statistics ( $\theta_w$ log-ratio and Tajima's D) in the comparison between Przewalski's horse and domestic horses (excluding Icelandic (P5782)).....      | 86  |
| Supplementary Figure S46. Screening for selective sweeps using $\theta_w$ log-ratio between the Przewalski's horse and domestic horses, 5% significant threshold.....                                                                                           | 87  |
| Supplementary Figure S47. Study design of the selective sweep scans with SNP Beadchip array data.....                                                                                                                                                           | 90  |
| Supplementary Figure S48. Model training .....                                                                                                                                                                                                                  | 91  |
| Supplementary Figure S49. Distribution of the expected frequency of derived alleles and the observed number of derived alleles in the ancient horse .....                                                                                                       | 95  |
| Supplementary Figure S50. A candidate region (highlighted in yellow) enclosing the KIT gene in the Clydesdale breed.....                                                                                                                                        | 98  |
| Supplementary Figure S51. A candidate region (highlighted in yellow) enclosing the MC1R gene in the Belgian breed .....                                                                                                                                         | 99  |
| Supplementary Figure S52. Diagram of the Hidden Markov Model .....                                                                                                                                                                                              | 100 |
| Supplementary Figure S53. Conditional probabilities of derived alleles in CGG10022 given the numbers of derived alleles in modern horses.....                                                                                                                   | 102 |
| Supplementary Figure S54. Horse demography used for simulation .....                                                                                                                                                                                            | 102 |
| Supplementary Figure S55. Histogram of the posterior probabilities of being in an external state.....                                                                                                                                                           | 103 |
| Supplementary Figure S56. Size distributions of external regions .....                                                                                                                                                                                          | 104 |
| Supplementary Figure S57. Genes within the longest external regions .....                                                                                                                                                                                       | 106 |
| Supplementary Figure S58. Relative overlap of Ensembl gene IDs detected as potential candidates for positive selection across all methods .....                                                                                                                 | 110 |
| Supplementary Figure S59. Venn diagram of genes detected by method category .....                                                                                                                                                                               | 114 |

## Supplementary Tables

|                                                                                                                                                                                                                                                            |    |
|------------------------------------------------------------------------------------------------------------------------------------------------------------------------------------------------------------------------------------------------------------|----|
| Supplementary Table S1. Samples used in this study .....                                                                                                                                                                                                   | 9  |
| Supplementary Table S2. Sequencing information concerning CGG10022.....                                                                                                                                                                                    | 11 |
| Supplementary Table S3. Sequencing information concerning CGG10023.....                                                                                                                                                                                    | 12 |
| Supplementary Table S4. Sequence mapping statistics for modern and ancient samples .....                                                                                                                                                                   | 13 |
| Supplementary Table S5. Estimation of endogenous DNA content of libraries for CGG10022 .....                                                                                                                                                               | 14 |
| Supplementary Table S6. Estimation of endogenous DNA content of libraries for CGG10023 .....                                                                                                                                                               | 14 |
| Supplementary Table S7. Average $\log(\theta w)$ for horse autosomes and chrX .....                                                                                                                                                                        | 20 |
| Supplementary Table S8. Classification of functional variants across samples .....                                                                                                                                                                         | 21 |
| Supplementary Table S9. Samples used for metagenomic analyses .....                                                                                                                                                                                        | 29 |
| Supplementary Table S10. Posterior estimates of mt mutation rate and TMRCA of horses.....                                                                                                                                                                  | 30 |
| Supplementary Table S11. Functional assessment of SNPs in horses and the domestic donkey<br>(chromosomes 1 – 9).....                                                                                                                                       | 37 |
| Supplementary Table S12. Functional assessment of SNPs in horses and the domestic donkey<br>(chromosomes 10 – X) .....                                                                                                                                     | 38 |
| Supplementary Table S13. Per-sample maximum depths for SNP quality filtering.....                                                                                                                                                                          | 39 |
| Supplementary Table S14. Times (kyr) to the most recent common ancestors .....                                                                                                                                                                             | 41 |
| Supplementary Table S15. Times (kyr) to the most recent common ancestors (relaxed clock).....                                                                                                                                                              | 42 |
| Supplementary Table S16. ABBA-BABA tests between domestic and pre-domesticated horses...44                                                                                                                                                                 |    |
| Supplementary Table S17. ABBA-BABA tests between ancient, domestic and Przewalski's horse<br>.....                                                                                                                                                         | 45 |
| Supplementary Table S18. ABBA-BABA tests between two domestic and Przewalski's horse.....                                                                                                                                                                  | 45 |
| Supplementary Table S19. Proportion of the genomes of domesticated horses resulting from<br>admixture.....                                                                                                                                                 | 46 |
| Supplementary Table S20. Population split times with no migration .....                                                                                                                                                                                    | 51 |
| Supplementary Table S21. Population split times with migration .....                                                                                                                                                                                       | 52 |
| Supplementary Table S22. f-3 statistic for CGG10023; CGG10022, (non-)Nordic horses.....                                                                                                                                                                    | 54 |
| Supplementary Table S23. f-3 statistic for CGG10022; modern horse, modern horse .....                                                                                                                                                                      | 54 |
| Supplementary Table S24. f-3 statistic for CGG10023; modern horse, modern horse .....                                                                                                                                                                      | 55 |
| Supplementary Table S25. ABBA-BABA tests between modern and two ancient horses .....                                                                                                                                                                       | 55 |
| Supplementary Table S26. f-3 statistic testing for admixture for (non-)Nordic .....                                                                                                                                                                        | 56 |
| Supplementary Table S27. The $\partial a \partial i$ maximum-likelihood estimates for the horses demographic<br>inferences .....                                                                                                                           | 58 |
| Supplementary Table S28 Kolmogorov-Smirnov test of genetic loads (all sites) .....                                                                                                                                                                         | 64 |
| Supplementary Table S29 Kolmogorov-Smirnov test of genetic loads (transversions only) .....                                                                                                                                                                | 65 |
| Supplementary Table S30. Genes undergoing positive selection in the domestic clade .....                                                                                                                                                                   | 73 |
| Supplementary Table S31. Candidate genomic regions for selective sweeps, in the comparison<br>between two pre-domesticated horses and five domestic horse breeds .....                                                                                     | 79 |
| Supplementary Table S32. Intersection of genomic regions for selective sweeps defined by the<br>overlap of between $\theta w$ peaks and Tajima's D valleys, in the comparison between two pre-<br>domesticated horses and five domestic horse breeds ..... | 79 |
| Supplementary Table S33. Genomic regions candidate for selective sweeps, in the comparison<br>between 2 pre-domesticated horses and 6 domestic horse breeds .....                                                                                          | 84 |
| Supplementary Table S34. Truncated genomic regions for selective sweeps delimited by $\theta w$<br>valleys and Tajima's D peaks, in the comparison between 2 pre-domesticated horses and 6<br>domestic horse breeds .....                                  | 84 |
| Supplementary Table S35. Genomic regions candidate for selective sweeps, in the comparison<br>between the Przewalski's horse and 5 domestic horse breeds .....                                                                                             | 88 |
| Supplementary Table S36. Truncated genomic regions for selective sweeps delimited by $\theta w$<br>valleys and Tajima's D peaks, in the comparison between the Przewalski's horse and 5<br>domestic horse breeds .....                                     | 89 |

|                                                                                                                                                                                                         |     |
|---------------------------------------------------------------------------------------------------------------------------------------------------------------------------------------------------------|-----|
| Supplementary Table S37. Regions in the top 1% of more than 30 breeds among all sets of comparisons of two window types .....                                                                           | 93  |
| Supplementary Table S38. Regions found in the top 5% of all 32 breeds of all sets of comparisons with two different window arrangements .....                                                           | 94  |
| Supplementary Table S39. Regions found in the top 1% of both sets of comparisons .....                                                                                                                  | 97  |
| Supplementary Table S40. External regions longer than 10 kb and their annotated genes.....                                                                                                              | 106 |
| Supplementary Table S41. List of non-synonymous sites that are homozygous ancestral in the ancient horse CGG10022, derived in five modern horses and with posterior probabilities of at least 0.8 ..... | 108 |
| Supplementary Table S42. Weighted selection of candidate genes (weight > 1).....                                                                                                                        | 113 |
| Supplementary Table S43. Weighted and un-weighted selection of candidate genes.....                                                                                                                     | 113 |
| Supplementary Table S44. Enriched functions in genes with a weight > 1 .....                                                                                                                            | 114 |
| Supplementary Table S45. Enriched functions in genes detected by more than one method .....                                                                                                             | 115 |



## S1 Genome sequencing

### S1.1 Sample information

The samples used in this study (listed in Supplementary Table S1) were previously described in Orlando *et al.* 2013 (1), with the exception of the sample labeled “Icelandic (P5782)”, previously described in Andersson *et al.* 2012 (2). The domestic Thoroughbred horse (Twilight) corresponds to the individual originally sequenced for the assembly of the horse reference genome EquCab2.0 (3). It was subsequently deep-sequenced on Illumina platforms, representing an additional sequence dataset equivalent to 20.71× genome coverage (1).

In the present study, we characterize the genomic sequence of two ancient horse specimens, CGG10022 and CGG10023, at 24.27× and 7.36× coverage, respectively. The ancient specimens were excavated in Krasnoyarsk (Taymyr peninsula), Russia, and radiocarbon dated to 42,692 ± 891 (UBA-16478) and 16,099 ± 192 cal BP (UBA-16479) respectively, following calibration using Calib rev6.0.0 (4). These ages are roughly equivalent to 43 kyr and 16.5 kyr BP, in line with the ages used in the following section and reported in the main text. Dating was carried out at the 14Chrono Centre, Queen's University in Belfast (1).

We refer to samples by breed, followed by the associated name in parentheses, if any. Our ancient samples pre-date the earliest known evidence of horse domestication 5.5 kyr BP (5) and are therefore not associated with any domestic breed. These are referred to using the sample name alone (*i.e.* CGG10022 and CGG10023). To differentiate between the Icelandic horse sequenced by Orlando *et al.* 2013 (1) and the Icelandic horse sequenced by Andersson *et al.* 2012 (2), we refer to these as “Icelandic (unnamed)” and “Icelandic (P5782)”, respectively (Supplementary Table S1). The term “pre-domesticated” is used to refer to the samples CGG10022 and CGG10023, while the term “wild” is used to refer to all undomesticated horses, including the two pre-domesticated horses (CGG10022 and CGG10023), as well as the Przewalski's horse, which has never been domesticated (1).

|                         | Gender | Age (BCE)     | Domestic | Coverage (×) | Reference |
|-------------------------|--------|---------------|----------|--------------|-----------|
| Arabian                 | Female | Modern        | Yes      | 10.44        | (1)       |
| CGG10022                | Female | 42,012-40,094 | No       | 24.27        | (1)       |
| CGG10023                | Male   | 14,900-14,044 | No       | 7.36         | (1)       |
| Domestic donkey (Willy) | Male   | Modern        | Yes      | 11.82        | (1)       |
| Icelandic (P5782)       | Male   | Modern        | Yes      | 32.66        | (2)       |
| Icelandic (unnamed)     | Male   | Modern        | Yes      | 8.10         | (1)       |
| Norwegian Fjord         | Female | Modern        | Yes      | 7.44         | (1)       |
| Przewalski's horse      | Male   | Modern        | No       | 9.09         | (1)       |
| Standardbred            | Male   | Modern        | Yes      | 11.58        | (1)       |
| Thoroughbred (Twilight) | Female | Modern        | Yes      | 20.71        | (1)       |

#### Supplementary Table S1. Samples used in this study

Where available, the name of the sample is shown in parentheses following the name of the breed, except for the two pre-domesticated samples, where only the sample name is shown; the age is given based on the calibrated radiocarbon dates. Coverage is given relative to the EquCab2.0 reference nuclear genome (see section S1.3).

### S1.2 DNA sequencing

The pre-domesticated specimens (CGG10022 and CGG10023) had previously been sequenced to an average depth-of-coverage of 1.78× and 0.18× respectively (1), based on alignments against the EquCab2.0 horse reference genome (3); this sequencing information resulted from the deep-sequencing of one A-tailed and one blunt-end library for CGG10022, and one blunt-end library for CGG10023 (1).

For this study, new Illumina DNA libraries were built for these two samples and shotgun sequenced in order to increase the depth-of-coverage. We used previously described protocols (1, 6, 7), except that 1) 500nM of adapters were used for ligation and that 2) DNA libraries included one, two or three unique adapters. For CGG10022, a total of 3 new blunt end libraries were built using a method modified from Kircher and Meyer 2010 (8), where either regular or modified adapters were used. Modified adapters included of a unique 7-mer index located downstream of a block including Illumina sequencing primers and 5 random bases. Therefore, when one of such adapters was used, the first read mate started with the sequence of the 5 random bases and was followed by the 7-mer that could be used, together with the standard index read performed during Illumina multiplex runs, for identifying the library that was sequenced. The block of 5 random bases was included in order to enable proper base calling. When two of such adapters were used, the second read mate could be also used for library identification. More specifically, a first adapter was prepared following Kircher and Meyer 2010 (8) by mixing IS1F\_03 5'-A\*C\*A\*C\*TCTTTCCCTACACGACGCTCTTCCGATCTNNNNNAAC\*T\*G\*G\*C-3' and IS3F\_03 5'-G\*C\*C\*A\*GTTNNNNNAGATCGGAA\*G\*A\*G\*C-3', where \* corresponds to a PTO bond and N to any base. The second adapter was prepared using the same procedure by mixing IS2R\_54 5'-G\*T\*G\*A\*CTGGAGTTCAGACGTGTGCTCTTCCGATCTNNNNNTGG\*C\*A\*T\*G-3' and IS3R\_54 5'-C\*A\*T\*G\*CCANNNNNAGATCGGAA\*G\*A\*G\*C-3'. Reads generated from such DNA libraries were identified requiring a strict sequence identity to the indexes selected and were further trimmed for their first 12 base positions.

We also built a series of six new DNA libraries for CGG10022 using the modified TruSeq DNA library building procedure described in Pedersen et al. 2014 (9). Two of those DNA libraries were PCR amplified using one amongst three possible PCR amplification conditions. The first amplification conditions consisted of a 25 µl volume reaction with 10 µl of DNA library, and 5 units *AmpliTaq Gold* (Life Technologies), 1× Gold Buffer, 4 mM MgCl<sub>2</sub>, 1 mg/ml BSA, 62.5 µM of each dNTP, 0.3 µM of Primer 1.0 (5'-AAT GAT ACG GCG ACC ACC GAG ATC TAC ACT CTT TCC CTA CAC -3') and 0.3 µM of Primer 2.0 (5'-CAA GCA GAA GAC GGC ATA CGA GAT-3'). PCR cycling conditions consisted of initial denaturation for 10 min at 92°C, followed by 15 cycles of 30 sec denaturation at 92°C, 30 sec annealing at 65°C and 3 min elongation at 72°C. There was a final 7 min elongation step at 72°C. The second amplification conditions were similar, except that *Accuprime Pfx* was used instead of *Taq Gold*. A total of 3.125 enzyme units and 1 mM of MgSO<sub>4</sub> were used in the reaction mix. PCR cycling conditions were 2 min at 95°C, 15 cycles of 15 seconds at 95°C, 30 seconds at 60°C and 40 seconds at 68°C, followed by a final elongation of 7 min at 68°C. Finally, the third amplification conditions were identical to the second ones, except that the amplification was performed in an emulsion by mixing the PCR preparation to 150 µl of a mixture consisting of Tegosoft DEC (73% vol.; Evonik), mineral oil (20% vol.; Sigma) and ABIL WE 09 (7% vol; Evonik). Following vortexing for 2 min at maximum speed, the emulsion was then divided into two PCR tubes for performing PCR amplification. Post-amplification, the tubes from each sample were pooled again before the emulsion was broken by the addition of 1ml isobutanol to each tube. Amplified DNA libraries were then purified using Qiagen Minelute and adding 250 µl of buffer PB. The final elution was performed in 20 µL EB following 15 min incubation at 37°C.

A total of 8 new A-tailed libraries, together with one new blunt-end library, were built for CGG10023 (LOd, see Supplementary Table S3), following the procedures described in Orlando et al. 2013 (1). Indexed libraries were sequenced using either the Illumina HiSeq2000 platform or the Solexa GAIIX (detailed in Supplementary Table S2 and Supplementary Table S3). DNA contamination

from the laboratory and reagents were monitored through mock extractions and amplification blanks. All controls were negative.

The sequencing data generated for this study is available from the European Nucleotide Archive under accession number PRJEB7537.

| Identifier        | Library         | PCR  | # Lanes   | # Raw reads   | # Filtered reads | # Collapsed pairs |
|-------------------|-----------------|------|-----------|---------------|------------------|-------------------|
| <b>ACTTGA (1)</b> | KM              | TG   | 1SE HiSeq | 50,078,895    | 49,976,516       |                   |
| <b>CGTAGT (1)</b> | AT              | PL   | 1SE GA    | 18,999,000    | 17,711,195       |                   |
| <b>CGTAGT (1)</b> | AT              | PL   | 1SE HiSeq | 28,229,336    | 26,545,981       |                   |
| <b>CTTGTA</b>     | TS              | AP   | 1SE HiSeq | 62,408,084    | 60,233,779       |                   |
| <b>CTTGTA</b>     | TS              | APem | 1SE HiSeq | 28,567,181    | 27,607,083       |                   |
| <b>CTTGTA</b>     | TS              | TG   | 1PE HiSeq | 68,766,184    | 66,836,830       | 29,340,618        |
| <b>CTTGTA</b>     | TS              | TG   | 8SE HiSeq | 385,968,696   | 372,028,432      |                   |
| <b>TGACCA</b>     | TS              | APem | 1SE HiSeq | 33,367,380    | 32,343,270       |                   |
| <b>TGACCA</b>     | TS              | AP   | 1PE HiSeq | 54,490,950    | 53,232,764       | 23,631,043        |
| <b>TGACCA</b>     | TS              | AP   | 8SE HiSeq | 338,500,525   | 326,790,205      |                   |
| <b>TGCAGG</b>     | KM              | TG   | 1PE HiSeq | 64,079,317    | 63,373,822       | 63,093,868        |
| <b>ACTGCC</b>     | KM <sup>1</sup> | TG   | 1PE HiSeq | 42,672,686    | 42,451,869       | 20,320,853        |
| <b>GCAACG</b>     | KM <sup>2</sup> | TG   | 1PE HiSeq | 41,767,892    | 41,577,160       | 18,679,590        |
| <b>Totals</b>     |                 |      |           | 1,217,896,126 | 1,180,708,906    | 155,065,972       |

### Supplementary Table S2. Sequencing information concerning CGG10022

For the sequenced lanes, SE stands for single-end and PE for paired-end; the first 2 libraries were generated by Orlando et al. 2013, and the second was sequenced both on a GAIIx Illumina platform and a HiSeq 2000 (1); see Supplementary Section S1.2 for a break-down. Reads were quality filtered (# Filtered) and PE pairs were collapsed (# Collapsed) using AdapterRemoval (Supplementary Section S1.3). AT = A-tailing DNA library building procedure described in Orlando et al. 2013 (1). TS = modified TruSeq DNA library building procedure described in Pedersen et al. 2014 (9). KM = DNA library building procedure from Meyer and Kircher 2010 (8). KM<sup>1</sup> = same as KM, except that adapters IS1F\_03 and IS3F\_03 were used. KM<sup>2</sup> = same as KM<sup>1</sup>, except that adapters IS2R\_54 and IS3R\_54 were also used. TG = DNA library PCR amplification with Taq Gold. PL = DNA library PCR amplification with Platinum Taq DNA polymerase Hifi (Life Technologies). AP = DNA library PCR amplification with AccuPrime. APem = same as AP, except that the amplification was performed in emulsion.

| Identifier   | Library | PCR | # Lanes                 | # Raw reads   | # Filtered reads | # Collapsed pairs |
|--------------|---------|-----|-------------------------|---------------|------------------|-------------------|
| <b>Lib1</b>  | AT      | PL  | 2 SE GA,<br>7 SE HiSeq  | 885,248,698   | 820,985,205      |                   |
| <b>Lib1</b>  | AT      | PL  | 9 PE HiSeq              | 3,736,172,758 | 3,631,029,592    | 1,691,109,372     |
| <b>Lib2</b>  | AT      | PL  | 2 SE GA                 | 51,121,936    | 49,132,328       |                   |
| <b>Lib3</b>  | AT      | PL  | 2 SE GA                 | 55,407,117    | 52,786,584       |                   |
| <b>Lib4</b>  | AT      | PL  | 2 SE GA                 | 57,995,741    | 55,112,384       |                   |
| <b>Lib9</b>  | AT      | PL  | 1 SE GA                 | 33,774,214    | 20,514,037       |                   |
| <b>Lib10</b> | AT      | PL  | 1 SE GA,<br>16 SE HiSeq | 1,523,064,414 | 1,380,426,783    |                   |
| <b>Lib11</b> | AT      | PL  | 1 SE GA                 | 20,186,952    | 19,796,775       |                   |
| <b>Lib12</b> | AT      | PL  | 7 SE GA,<br>8 SE HiSeq  | 899,425,110   | 877,664,959      |                   |
| <b>Lib12</b> | AT      | PL  | 9 PE HiSeq              | 1,858,699,964 | 1,840,358,776    | 896,290,345       |

|                |    |    |            |                |                |               |
|----------------|----|----|------------|----------------|----------------|---------------|
| <b>LOb (1)</b> | KM | TG | 2 PE HiSeq | 448,763,138    | 434,297,959    | 211,231,343   |
| <b>LOc (1)</b> | KM | TG | 2 PE HiSeq | 423,988,764    | 396,247,048    | 192,241,677   |
| <b>LOd</b>     | KM | TG | 2 PE HiSeq | 781,736,652    | 766,567,690    | 379,264,045   |
| <b>Totals</b>  |    |    |            | 10,775,585,458 | 10,344,920,120 | 3,370,136,782 |

### **Supplementary Table S3. Sequencing information concerning CGG10023**

For the sequenced lanes, SE stands for single-end and PE for paired-end; the libraries LOb and LOc reflect the combined sequencing effort by this study and the study by Orlando et al. 2013 (1); see Supplementary Section S1.2 for a break-down. Reads were quality filtered (# Filtered) and PE pairs were collapsed (# Collapsed) using AdapterRemoval (Supplementary Section S1.3). See caption for Supplementary Table S2, for further details about DNA libraries and PCR amplification conditions.

## **S1.3 Read alignment against reference genomes**

The alignment procedure was based on previously described methods [Orlando *et al.* 2013, Supplementary Information section 4.2.b] (1), as implemented by the PALEOMIX pipeline (10), with small modifications.

For the pre-domesticated specimens CGG10022 and CGG10023, adapter sequences were trimmed from raw Illumina reads using AdapterRemoval (11) v1.2, using the same parameters as described in Orlando *et al.* 2013 (1). For the samples based on previously published sequence data, we used reads that had already been trimmed for the previous studies (1, 2). In both cases, paired-ended reads in which the sequences overlapped by at least 11bp (with a maximal number of one mismatch, or one third of the overlapping region when overlapping for more than 11 bp) were collapsed into a single consensus sequence (1). For the two pre-domesticated horses, paired-ended reads that did not overlap (and where thus not collapsed by AdapterRemoval) were excluded as likely modern contamination.

Trimmed reads were mapped against the horse reference genome EquCab2.0 (3) excluding the mitochondrial genome, but unlike previously (1) also including chromosome Un (unplaced contigs) to account for reads that could match several genomic locations. In addition, mapping was carried out separately for the horse reference mitochondrial genome (Accession Nb. NC\_001640). In both cases, mapping was carried out using BWA (12) v0.5.10 with default parameters, except that the seed-region was disabled for the two pre-domestic specimens (13).

Unmapped reads and reads with a mapping quality less than to 25 were discarded. Duplicates were identified and removed per library using the 5'-end mapping coordinate in the case of singleton reads (SE reads, and PE reads where one mate was discarded due to low quality), and using both external coordinates for paired (PE) and collapsed reads. Singleton and PE reads were filtered using *MarkDuplicates* from the Picard Tools suite (<http://picard.sourceforge.net>), and collapsed reads were identified and filtered using a modified version of the *FilterUniqueBAM.py* script kindly provided by Martin Kircher, included with the PALEOMIX pipeline (10). Final BAM files were realigned around indels using the Genome Analysis Toolkit (14) and processed using SAMTools (15) *calmd* to update edit distances and MD tags.

Raw sequencing reads for the sample "Icelandic (P5782)" were kindly provided by Pr. Leif Andersson and Dr. Calle Rubin. Following the procedure outlined above, an average depth-of-coverage of 33.22× was obtained for this sample, in agreement with the coverage reported in the original publication (2).

Mapping results are reported in Supplementary Table S4. Note that the number of processed reads given corresponds to the number of reads following filtering and collapsing of mate pairs. For CGG10022 and CGG10023, only SE reads and collapsed PE reads are included. The amount of endogenous DNA content was estimated for each library for the two pre-domesticated horses (Supplementary Table S5 and Supplementary Table S6).

Following mapping, read length distributions were determined for the two pre-domesticated specimens based on the length of aligned bases for collapsed reads (Supplementary Figure S1). These reads represent DNA inserts sequenced over their full length, thus giving access the length distribution of the ancient DNA fragments (1). A ca. 10 bp periodicity was observed for both specimens, especially striking for the older sample CGG10022. This pattern is likely to result from the DNA helix complete turn (10 bp) and the corresponding nucleosome protection footprint, as recently suggested by Pedersen *et al* 2014 (9). Interestingly, both size distribution profiles appear in phase and the ca. 10 bp periodicity vanishes for insert sizes longer than 160 bp, which is close to the length of the DNA protected by the core nucleosome.

|                         | # Processed reads | # Reads mapped | # Bases aligned | Coverage (X) |
|-------------------------|-------------------|----------------|-----------------|--------------|
| Arabian                 | 584,787,811       | 316,578,043    | 25,933,539,961  | 10.44        |
| CGG10022                | 1,087,238,002     | 683,106,199    | 60,299,305,610  | 24.27        |
| CGG10023                | 6,974,783,338     | 229,138,553    | 18,295,001,670  | 7.36         |
| Domestic donkey (Willy) | 710,057,244       | 390,728,563    | 29,376,890,451  | 11.82        |
| Icelandic (P5782)       | 1,012,659,095     | 837,658,548    | 81,160,940,284  | 32.66        |
| Icelandic (unnamed)     | 825,399,262       | 213,360,593    | 20,135,482,802  | 8.10         |
| Norwegian Fjord         | 641,198,340       | 227,416,322    | 18,496,722,991  | 7.44         |
| Przewalski's horse      | 560,502,966       | 254,870,164    | 22,592,812,840  | 9.09         |
| Standardbred            | 577,987,318       | 340,320,656    | 28,782,364,817  | 11.58        |
| Thoroughbred (Twilight) | 545,128,052       | 473,669,917    | 51,442,515,528  | 20.71        |

**Supplementary Table S4. Sequence mapping statistics for modern and ancient samples**

Trimmed sequences were mapped to the EquCab2.0 reference genome using BWA v0.5.10. The number of bases aligned and the coverage is given relative to the EquCab2.0 reference genome, including chrUn, but excluding chrM. Hits were tabulated subsequent to quality filtering and removal of PCR duplicates (see Supplementary Section S1.3). Processed reads are reported after quality filtering and collapsing of PE reads; for the pre-domesticated horses, only SE reads and collapsed PE reads are used.

| Identifier | Library | PCR  | # Lanes                 | # Processed reads | # Mapped reads | % Mapped |
|------------|---------|------|-------------------------|-------------------|----------------|----------|
| ACTTGA (1) | KM      | TG   | 1SE HiSeq               | 49,976,516        | 28,449,687     | 0.569    |
| CGTAGT (1) | AT      | PL   | 1SE GA,<br>1SE HiSeq    | 44,257,176        | 25,979,640     | 0.587    |
| CTTGTA     | TS      | AP   | 1SE HiSeq               | 60,233,779        | 42,656,693     | 0.708    |
| CTTGTA     | TS      | APem | 1SE HiSeq               | 27,607,083        | 19,787,353     | 0.717    |
| CTTGTA     | TS      | TG   | 1PE HiSeq,<br>8SE HiSeq | 409,524,644       | 263,105,917    | 0.642    |
| TGACCA     | TS      | APem | 1SE HiSeq               | 32,343,270        | 22,822,280     | 0.706    |
| TGACCA     | TS      | AP   | 1PE HiSeq,<br>8SE HiSeq | 356,391,926       | 231,166,727    | 0.649    |
| TGCAGG     | KM      | TG   | 1PE HiSeq               | 64,359,271        | 29,843,595     | 0.464    |
| ACTGCC     | KM      | TG   | 1PE HiSeq               | 21,464,154        | 10,443,470     | 0.487    |
| GCAACG     | KM      | TG   | 1PE HiSeq               | 21,080,183        | 8,850,837      | 0.420    |

|               |  |  |               |             |       |
|---------------|--|--|---------------|-------------|-------|
| <b>Totals</b> |  |  | 1,087,238,002 | 683,106,199 | 0.628 |
|---------------|--|--|---------------|-------------|-------|

**Supplementary Table S5. Estimation of endogenous DNA content of libraries for CGG10022**

The endogenous DNA content was estimated as the fraction of high quality, collapsed reads that mapped to the EquCab2.0 reference genome with a minimum mapping quality of 25, excluding reads identified as PCR duplicates (see Supplementary Section S1.3). Thus this number provides a conservative number of the fraction of informative reads in the libraries.

| Identifier     | Library | PCR | # Lanes                               | # Processed reads | # Mapped reads | % Mapped |
|----------------|---------|-----|---------------------------------------|-------------------|----------------|----------|
| <b>Lib1</b>    | AT      | PL  | 2 SE GA,<br>7 SE HiSeq,<br>9 PE HiSeq | 2,760,905,425     | 64,836,298     | 0.023    |
| <b>Lib2</b>    | AT      | PL  | 2 SE GA                               | 49,132,328        | 4,224,340      | 0.086    |
| <b>Lib3</b>    | AT      | PL  | 2 SE GA                               | 52,786,584        | 4,407,409      | 0.083    |
| <b>Lib4</b>    | AT      | PL  | 2 SE GA                               | 55,112,384        | 5,797,519      | 0.105    |
| <b>Lib9</b>    | AT      | PL  | 1 SE GA                               | 20,514,037        | 1,001,756      | 0.049    |
| <b>Lib10</b>   | AT      | PL  | 1 SE GA,<br>16 SE HiSeq               | 1,380,426,783     | 21,571,027     | 0.016    |
| <b>Lib11</b>   | AT      | PL  | 1 SE GA                               | 19,796,775        | 350,937        | 0.018    |
| <b>Lib12</b>   | AT      | PL  | 7 SE GA,<br>8 SE HiSeq,<br>9 PE HiSeq | 1,821,733,390     | 34,390,599     | 0.019    |
| <b>LOb (1)</b> | KM      | TG  | 2 PE HiSeq                            | 434,297,959       | 18,618,500     | 0.043    |
| <b>LOc (1)</b> | KM      | TG  | 2 PE HiSeq                            | 396,247,048       | 4,064,389      | 0.010    |
| <b>LOd</b>     | KM      | TG  | 2 PE HiSeq                            | 766,567,690       | 69,875,779     | 0.091    |
| <b>Totals</b>  |         |     |                                       | 7,757,520,403     | 229,138,553    | 0.030    |

**Supplementary Table S6. Estimation of endogenous DNA content of libraries for CGG10023**

The endogenous DNA content was estimated as the fraction of (collapsed) quality / PCR filtered reads that mapped to the EquCab2.0 reference genome with a minimum mapping quality of 25 (see Supplementary Section S1.3). Thus this number provides a conservative number of the fraction of informative reads in the libraries.

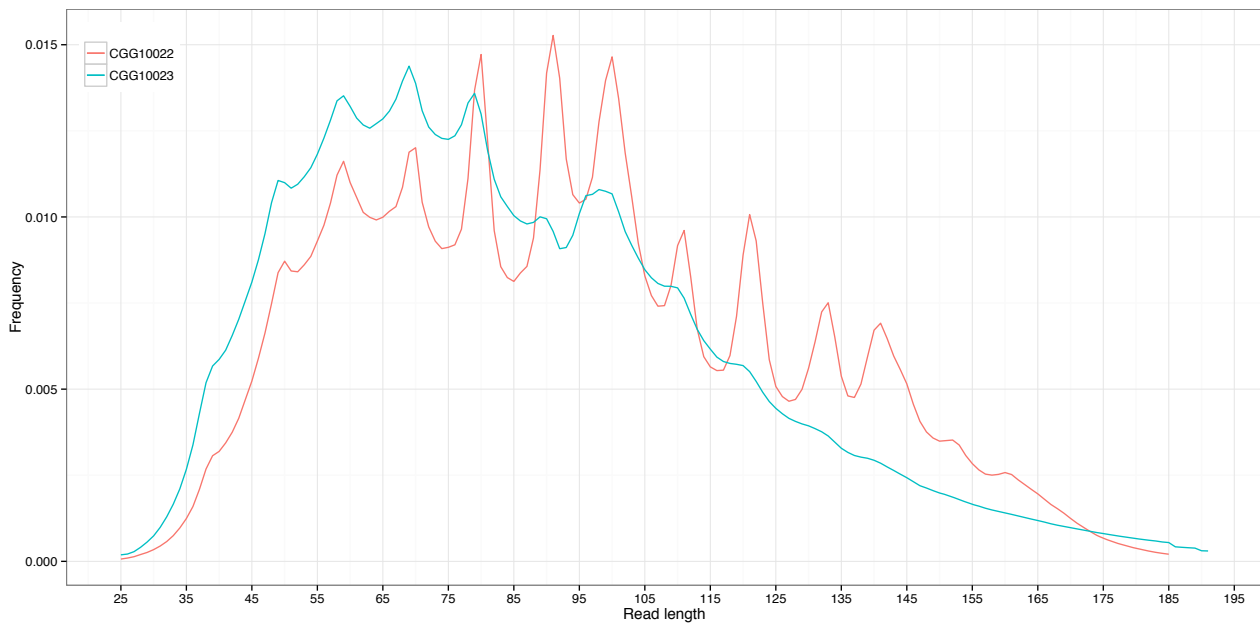

**Supplementary Figure S1. Length distribution of mapped reads from pre-domesticated horses**

The length-distributions of aligned sequences (excluding clipped bases) for collapsed PE reads mapped to the EquCab2.0 reference genome, for pre-domesticated horses CGG10022 and CGG10023.

### S1.4 Sample-wise error rates

Error rates were determined for each sample as described in Orlando et al. 2013 [see their Supplementary section S4.4](1), excluding the Thoroughbred (Twilight), as it represents the individual from which the reference sequence was built (see Supplementary Section S1.1). Briefly, the samples were mapped to the EquCab2.0 reference genome, a single high quality horse was selected to represent the “perfect genome”, and the outgroup was used to polarize alleles. As each horse should be equidistant from the outgroup, an increase in derived alleles relative to the “perfect genome” can be interpreted as an increase in the error rate.

For a given sample  $s$  let  $A_s$  and  $a_s$  denote the true and observed number of ancestral alleles respectively. Similarly let  $D_s$  and  $d_s$  denote the true and observed number of derived alleles. Given an error rate  $\epsilon_s$  the expected number of derived allele is

$$\mathbb{E}[d_s] = D_s(1 - \epsilon_s) + A_s\epsilon_s.$$

In order to obtain estimates for the true number of ancestral and derived alleles we use the “perfect genome”  $p$  such that  $\widehat{A}_p = a_p$  and  $\widehat{D}_p = d_p$ . An estimate of the overall error rate can then be obtained as

$$\hat{\epsilon}_i = \frac{d_i - d_p}{a_p - d_p}.$$

The type specific error rates are estimated based on a maximum likelihood model based on similar assumptions, which are described in details in Orlando *et al.* 2013 (1).

The Icelandic (P5782) was chosen as the “perfect genome”, as it is the sample with the highest coverage, and the domestic donkey (Willy) was used to determine the ancestral allele (see above).

A single base was sampled at each position for each sample in order to derive the estimates; for this purpose, the Icelandic (P5782) and the domestic donkey (Willy) were filtered using the criteria that the Phred encoded mapping score must be at least 30, and that the Phred encoded base quality must be at least 35 (Supplementary Figure S2). Based on the error rates estimated based on these criteria, the remaining samples were filtered using a minimum mapping quality of 30, and a minimum base quality of 25 (Supplementary Figure S3).

Following quality filtering, we observed error rates below 0.1% per base for all mutation types, except for samples CGG10022 and CGG10023 where C→T and G→A error rates were found to be 0.14% and 0.14% for CGG10022, and 0.34 and 0.33% for CGG10023, respectively. Those substitutions correspond to nucleotides that were misincorporated during DNA library amplification, due to the presence of cytosine residues deaminated into uracil residues *post-mortem* (16) (see also Supplemental section S1.5). Overall, we estimate that the two ancient genomes characterized in this study have an average error rate of 0.24% (CGG10023) and 0.11% (CGG10022) per base.

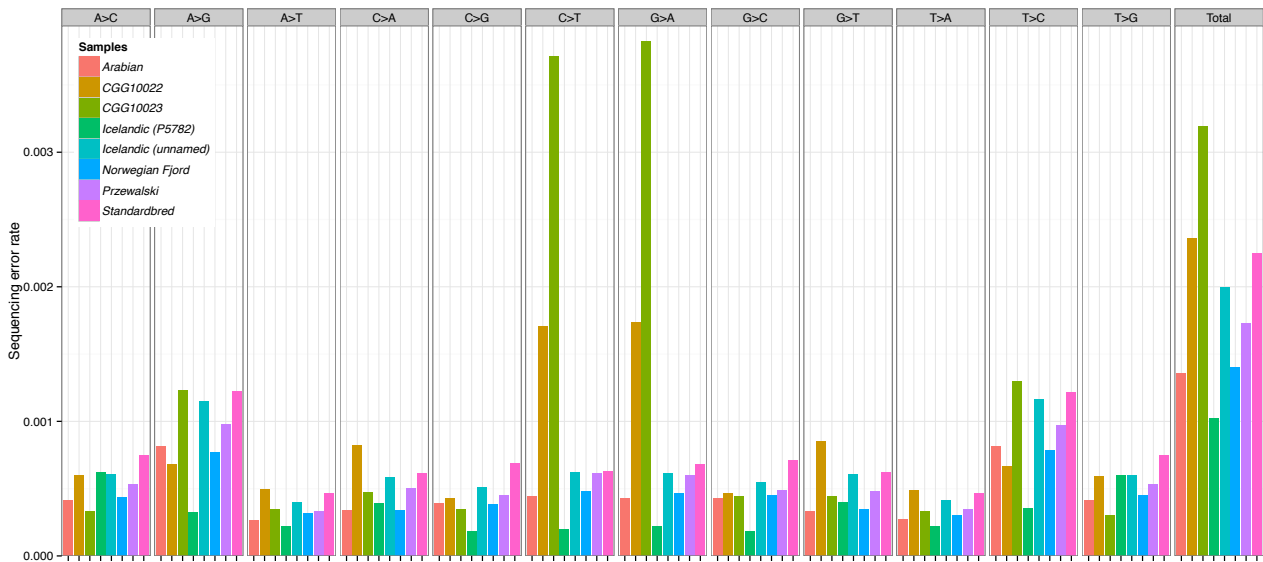

**Supplementary Figure S2. Error rates of wild and domestic horses without quality filtering**

Type specific error rates estimated relative to the Icelandic (P5782) sample, assuming that this sample represents a “perfect genome”, and using the domestic donkey (Willy) to determine the ancestral alleles. The “perfect genome” and the outgroup was filtered using a minimum mapping score of 30, and a minimum base-quality score of 35 (both Phred-scaled); the remaining samples were not quality-filtered.



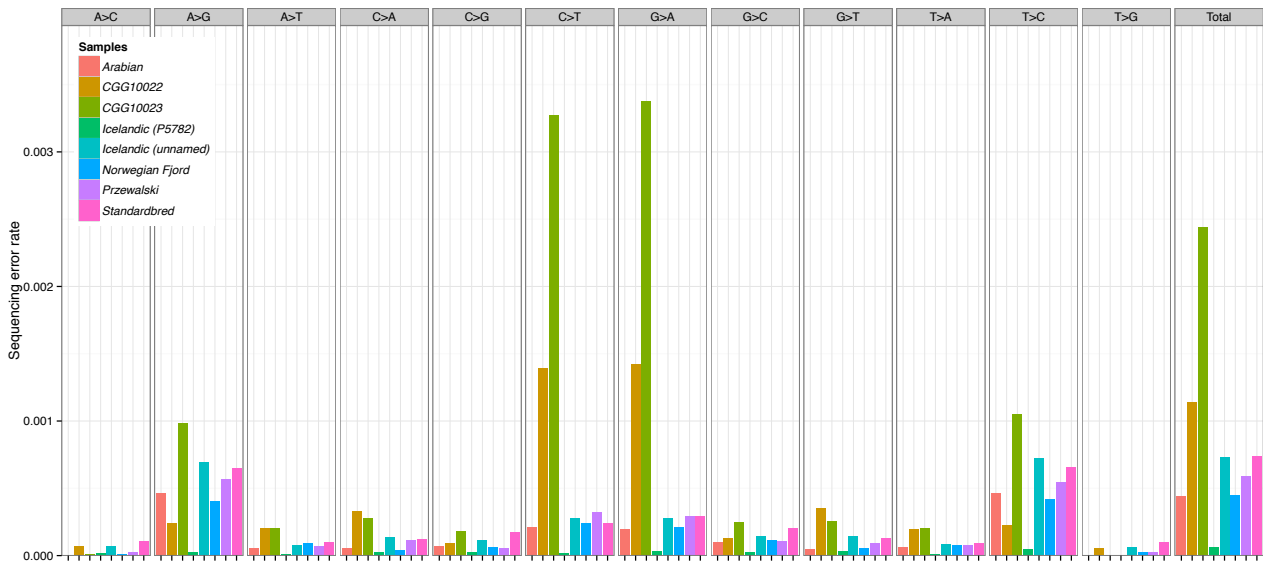

### Supplementary Figure S3. Error rates of wild and domestic horses with quality filtering

Type specific error rates estimated relative to the Icelandic (P5782) sample, assuming that this sample represents a “perfect genome”, and using the Domestic Donkey (Willy) to determine the ancestral alleles. The “perfect genome” and the outgroup was filtered using a minimum mapping score of 30, and a minimum base-quality score of 35 (both Phred-scaled); the remaining samples were filtered using a minimum mapping quality of 30, and a minimum base quality score of 25 (Phred scaled).

### S1.5 Post-mortem damage of pre-domesticated samples

Sample-wide *post-mortem* DNA damage and fragmentation patterns for the pre-domesticated horses were estimated using mapDamage2.0(17), and plotted using a modified version of the mapDamage2.0 R-script (Supplementary Figure S4). Estimates of parameters were based on 100,000 randomly selected sequence alignments (using option “-n 100000”) for each sample (Supplementary Figure S5). The plots reveal the expected pattern of *post-mortem* damage in the form of C>T substitutions at the 5’ termini, and the complementary G>T substitutions at the 3’ termini. The excess of purines observed near read-termini furthermore supports fragmentation driven by depurination (16).

### CGG10022

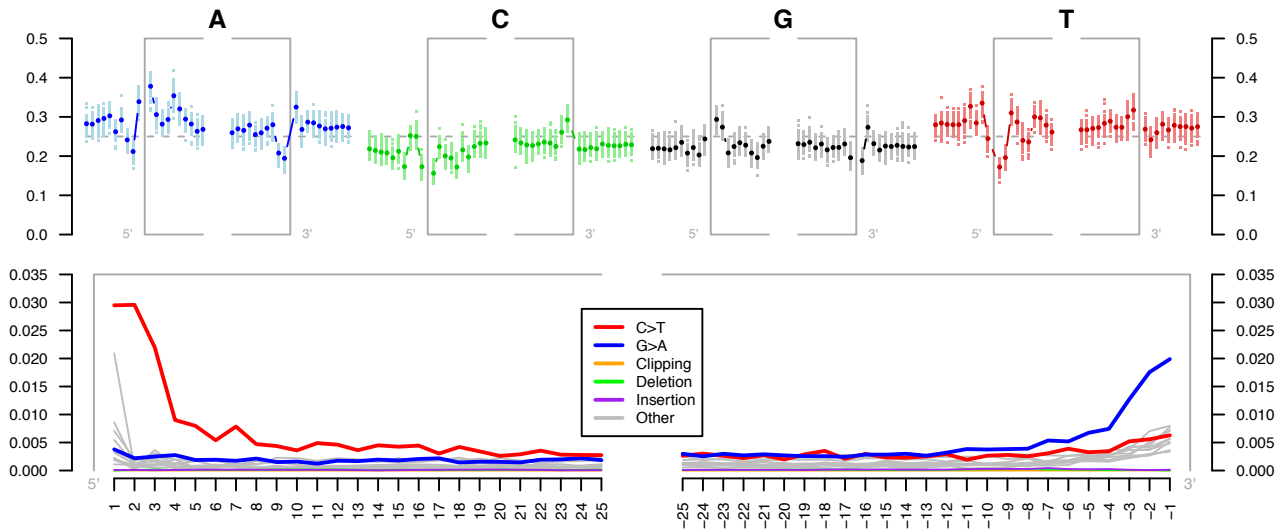

### CGG10023

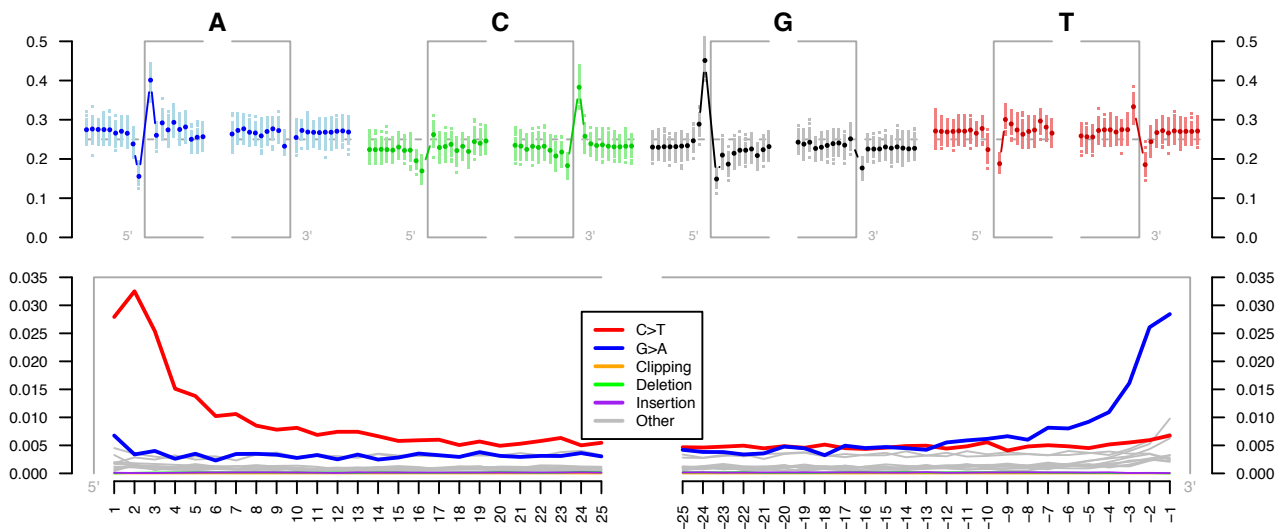

#### Supplementary Figure S4. Post-mortem DNA damage and fragmentation patterns of pre-domesticated horses

DNA composition around read-termini (top plots), and DNA misincorporation errors relative to the 5' and 3' read termini for the pre-domestic samples (bottom plots); the two distributions for post mortem damage signatures (C>T and G>A) are shown in red and blue respectively, while other types of substitutions are shown in gray. Nucleotide frequencies are shown for 10 bases upstream and downstream of the 5' and 3' read termini.

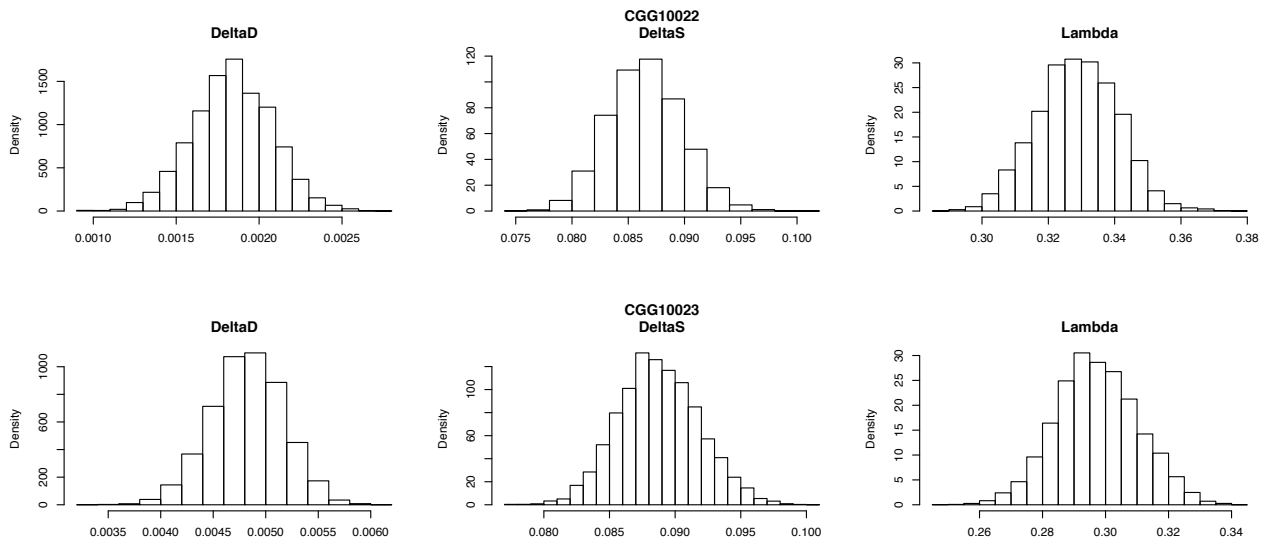

### Supplementary Figure S5. Model parameters estimated by mapDamage2.0

MCMC estimated posterior distribution for the model parameters. Lambda is the probability of terminating an overhang and DeltaD/DeltaS is the probability of cytosine deamination in a double and single strand context, respectively.

## S1.6 Average genomic-wide heterozygosity estimates

The average heterozygosity was estimated for each horse described in this study, by calculating the Watterson estimator ( $\hat{\theta}_w$ ) (18) for 50 kb overlapping regions with a step-size of 10 kb of the genome as described in Supplementary Section S4.2. Priors for the autosomes were constructed using the site frequency spectrum observed for chromosome 22, while the site frequency spectrum observed for chrX was used for that chromosome. Windows in which less than 45 kb were covered were excluded from the analyses. The  $\hat{\theta}_w$  for the pre-domesticated horses (CGG10022 and CGG10023) was calculated with or without transitions, in order to control for the effect of *post-mortem* DNA damage on the estimates. To examine the effect of *post-mortem* DNA damage, the average genomic heterozygosity of the samples were estimated with and without transitions (Supplementary Table S7).

| Sample              | With transitions |       | Without transitions |       |
|---------------------|------------------|-------|---------------------|-------|
|                     | Autosomes        | chr X | Autosomes           | chrX  |
| Arabian             | 4.116            | 3.558 | 3.168               | 2.663 |
| CGG10022            | 4.582            | 4.131 | 3.684               | 3.356 |
| CGG10023            | 5.272            |       | 4.080               |       |
| Norwegian Fjord     | 4.314            | 3.850 | 3.348               | 2.981 |
| Icelandic (unnamed) | 4.323            |       | 3.378               |       |
| Icelandic (P5782)   | 4.431            |       | 3.380               |       |
| Przewalski's horse  | 4.284            |       | 3.303               |       |
| Standardbred        | 4.161            |       | 3.150               |       |

|                         |       |       |       |       |
|-------------------------|-------|-------|-------|-------|
| Thoroughbred (Twilight) | 4.031 | 3.994 | 3.004 | 3.035 |
| Domestic donkey (Willy) | 4.041 |       | 3.100 |       |

**Supplementary Table S7. Average  $\log(\hat{\theta}_w)$  for horse autosomes and chrX**

The heterozygosity of chrX is only estimated for female individuals.

### S1.7 Functional categorization of SNP variation

Genotyping was carried out as described in Supplementary Section S2.5 for each sample, excluding chromosome X and “Un”, due to the variable ploidy of chromosome X, and due to the highly repetitive nature of chrUn, leading to a high risk of SNPs called due to paralogous sequences; the filtered VCF records were annotated using v72 of the Ensembl “Variant Effect Predictor” (VEP) script (19). The results are tabulated in Supplementary Table S8; in cases where a variant was assigned multiple classifications (e.g. when adjacent to multiple genes / transcripts), the variant was counted once (and only once) for each type of classification. Genes are reported only once for each associated classification.

The following categories of variants are listed:

1. Outside genes:
  - 1.1. *Intergenic*, variant located *between* genes, but not in 1.2 or 1.3
  - 1.2. *Upstream*, variant located less than 5kb upstream of the 5’-termini of a gene
  - 1.3. *Downstream*, variant located less than 5kb downstream of the 3’-termini of a gene
2. Inside genes
  - 2.1. *Intron*, variant located in intronic region of gene
  - 2.2. *Non-coding Exon*, variant located in a non-coding exon (e.g. RNA)
  - 2.3. *5’ UTR*, variant located in the 5’ un-translated region of a gene
  - 2.4. *3’ UTR*, variant located in the 3’ un-translated region of a gene
  - 2.5. *Splice Site*, variant located in splice region, within 1-3 bp of the exon, or within 3-8 bp of the intron
  - 2.6. *Mature miRNA*, variant located within the sequence of a mature miRNA
  - 2.7. *Coding exon*, variants located within coding regions
    - 2.7.1. *Frameshift*, variant resulting in a frameshift of the amino acid sequence
    - 2.7.2. *Synonymous*, variant not resulting in a change in the amino acid sequence
    - 2.7.3. *Non-synonymous*, variant resulting in a change in the amino acid sequence, while preserving the length of the sequence
    - 2.7.4. *Stop gain*, variant resulting in the gain of a stop codon
    - 2.7.5. *Stop loss*, variant resulting in the loss of a stop codon

A Venn diagram showing the intersections between the filtered set of SNPs observed for the domestic horses, and the filtered sets of SNPs observed for each of the wild horses is plotted in Supplementary Figure S6. VCF files for the domestic horses were merged using the bcftools ‘merge’ command (included with SAMTools (15)), and intersections were determined using the BEDTools (20) ‘intersect’ command with options  $-r -f 1.0$ . Final plotting was performed using the R package ‘VennDiagram’ (<http://cran.r-project.org/web/packages/VennDiagram/index.html>).

| Variant class | Arabian |           | CGG10022 |           | CGG10023 |           | Domestic donkey (Willy) |            | Icelandic (unnamed) |           |
|---------------|---------|-----------|----------|-----------|----------|-----------|-------------------------|------------|---------------------|-----------|
|               | Genes   | Variants  | Genes    | Variants  | Genes    | Variants  | Genes                   | Variants   | Genes               | Variants  |
| All variants  | 24,552  | 2,812,453 | 25,218   | 5,035,345 | 25,068   | 2,849,804 | 25,220                  | 23,507,788 | 24,911              | 2,375,124 |

|                        |           |         |           |           |           |         |            |           |           |         |
|------------------------|-----------|---------|-----------|-----------|-----------|---------|------------|-----------|-----------|---------|
| <b>Not genic</b>       | 2,039,000 |         | 3,687,011 |           | 2,057,609 |         | 17,004,370 |           | 1,745,273 |         |
| <b>Intergenic</b>      | 1,759,228 |         | 3,201,627 |           | 1,768,611 |         | 14,946,772 |           | 1,521,989 |         |
| <b>Downstream</b>      | 152,505   |         | 262,642   |           | 155,160   |         | 1,079,688  |           | 118,223   |         |
| <b>Upstream</b>        | 140,845   |         | 244,891   |           | 148,213   |         | 1,065,181  |           | 114,763   |         |
| <b>Genic</b>           | 17,690    | 821,239 | 19,497    | 1,427,564 | 17,926    | 843,234 | 21,702     | 6,841,884 | 17,613    | 665,664 |
| <b>Intron</b>          | 14,663    | 789,985 | 15,522    | 1,378,439 | 15,204    | 807,013 | 15,986     | 6,683,770 | 14,619    | 644,959 |
| <b>Non-coding Exon</b> | 1,213     | 2,297   | 1,809     | 3,969     | 954       | 1,895   | 3,264      | 13,575    | 1,314     | 2,302   |
| <b>5' UTR</b>          | 954       | 1,351   | 1,472     | 2,267     | 940       | 1,292   | 2,390      | 4,666     | 443       | 594     |
| <b>3' UTR</b>          | 1,352     | 1,876   | 2,126     | 3,281     | 1,526     | 2,173   | 5,241      | 13,796    | 1,039     | 1,356   |
| <b>Splice Site</b>     | 2,566     | 3,402   | 3,969     | 5,733     | 2,967     | 3,980   | 9,164      | 19,683    | 1,850     | 2,239   |
| <b>Mature miRNA</b>    | 19        | 19      | 23        | 23        | 9         | 9       | 52         | 62        | 10        | 10      |
| <b>Coding Exon</b>     | 8,022     | 16,630  | 10,524    | 25,748    | 8,784     | 18,789  | 16,261     | 87,159    | 6,197     | 10,538  |
| <b>Frameshift</b>      | 676       | 742     | 1,073     | 1,263     | 526       | 563     | 1,144      | 1,303     | 333       | 345     |
| <b>Synonymous</b>      | 7,505     | 15,077  | 9,937     | 23,242    | 8,357     | 17,367  | 16,089     | 84,619    | 5,854     | 9,801   |
| <b>Non-synonymous</b>  | 6,045     | 11,753  | 8,148     | 18,045    | 7,539     | 14,745  | 12,770     | 51,663    | 4,657     | 7,696   |
| <b>Stop gain</b>       | 70        | 71      | 150       | 156       | 337       | 348     | 392        | 414       | 72        | 74      |
| <b>Stop loss</b>       | 8         | 8       | 7         | 8         | 11        | 11      | 15         | 15        | 6         | 6       |

|                        | Icelandic (P5782) |                 | Norwegian Fjord |                 | Przewalski's Horse |                 | Standardbred |                 | Thoroughbred (Twilight) |                 |
|------------------------|-------------------|-----------------|-----------------|-----------------|--------------------|-----------------|--------------|-----------------|-------------------------|-----------------|
| <b>Variant class</b>   | <b>Genes</b>      | <b>Variants</b> | <b>Genes</b>    | <b>Variants</b> | <b>Genes</b>       | <b>Variants</b> | <b>Genes</b> | <b>Variants</b> | <b>Genes</b>            | <b>Variants</b> |
| <b>All variants</b>    | 25,123            | 5,907,958       | 24,821          | 2,509,192       | 25,119             | 3,215,366       | 24,751       | 3,355,119       | 21,396                  | 2,455,855       |
| <b>Not genic</b>       |                   | 4,371,085       |                 | 1,813,593       |                    | 2,347,764       |              | 2,457,020       |                         | 1,805,385       |
| <b>Intergenic</b>      |                   | 3,813,775       |                 | 1,572,944       |                    | 2,040,091       |              | 2,142,366       |                         | 1,569,123       |
| <b>Downstream</b>      |                   | 298,032         |                 | 128,505         |                    | 163,902         |              | 167,293         |                         | 126,152         |
| <b>Upstream</b>        |                   | 282,859         |                 | 123,309         |                    | 157,818         |              | 161,096         |                         | 120,125         |
| <b>Genic</b>           | 20,140            | 1,624,524       | 17,546          | 736,637         | 18,484             | 919,227         | 18,132       | 949,769         | 15,132                  | 687,787         |
| <b>Intron</b>          | 15,425            | 1,575,555       | 14,814          | 709,390         | 15,155             | 887,730         | 14,803       | 919,019         | 12,481                  | 666,265         |
| <b>Non-coding Exon</b> | 2,490             | 6,717           | 1,032           | 1,780           | 1,447              | 2,785           | 1,461        | 2,799           | 1,226                   | 2,704           |
| <b>5' UTR</b>          | 1,148             | 1,783           | 703             | 936             | 732                | 980             | 725          | 959             | 570                     | 838             |
| <b>3' UTR</b>          | 2,232             | 3,481           | 1,216           | 1,623           | 1,535              | 2,098           | 1,477        | 2,076           | 1,076                   | 1,491           |
| <b>Splice Site</b>     | 3,909             | 5,670           | 2,273           | 2,897           | 2,620              | 3,363           | 2,611        | 3,411           | 2,037                   | 2,625           |
| <b>Mature miRNA</b>    | 28                | 29              | 15              | 16              | 25                 | 25              | 19           | 19              | 13                      | 13              |
| <b>Coding Exon</b>     | 10,041            | 23,560          | 7,587           | 14,876          | 8,334              | 16,345          | 8,010        | 15,867          | 5,399                   | 10,458          |
| <b>Frameshift</b>      | 1,040             | 1,243           | 396             | 414             | 469                | 491             | 515          | 556             | 678                     | 753             |
| <b>Synonymous</b>      | 9,441             | 21,193          | 7,248           | 13,933          | 7,934              | 15,260          | 7,557        | 14,664          | 4,647                   | 8,931           |
| <b>Non-synonymous</b>  | 7,838             | 18,032          | 5,702           | 10,236          | 6,402              | 11,907          | 6,038        | 11,554          | 4,066                   | 8,016           |
| <b>Stop gain</b>       | 141               | 148             | 85              | 87              | 103                | 105             | 76           | 78              | 74                      | 74              |
| <b>Stop loss</b>       | 8                 | 8               | 3               | 3               | 3                  | 3               | 10           | 10              | 6                       | 7               |

### Supplementary Table S8. Classification of functional variants across samples

Classification carried out using the Ensembl VEP script; see Supplementary Section S1.7 for a description of the various classes. The column “**Genes**” gives the number of unique Ensembl annotated genes intersecting with one or more classes of variants; the column “**Variants**” gives the number of unique variants which are assigned a given class.

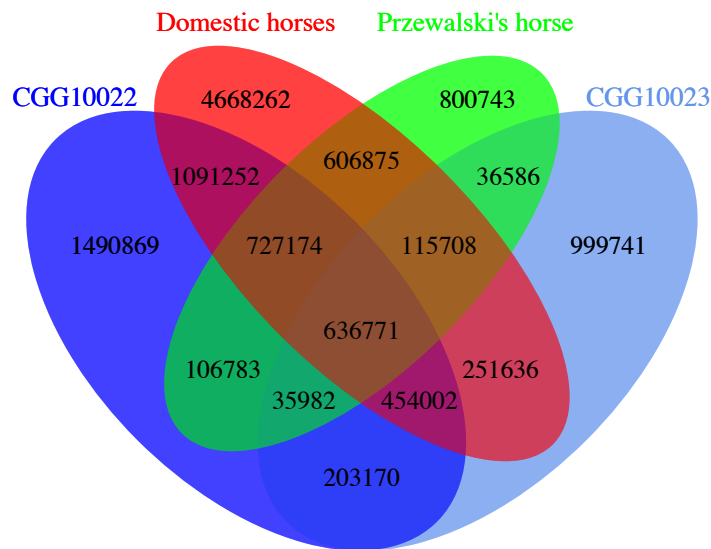

**Supplementary Figure S6. Intersection of SNPs called for domestic and wild horses**

## S1.8 Microbial profiling of ancient horse DNA extracts

### S1.8.1 Background

We performed metagenomic analyses on a subset of shotgun sequenced DNA libraries for the two samples CGG10022 and CGG10023, as well as for ancient horse shotgun datasets previously described in Orlando et al., 2013 (1) (Supplementary Table S9). Comparative analyses also included the microbial profiles of six ancient horses characterized in Der Sarkissian et al., 2014 (21).

All datasets were profiled using MetaPhlAn (Metagenomic Phylogenetic Analysis version 1.7.7, February 2013) (22) as implemented in the PALEOMIX pipeline (10, 21). Shotgun sequencing reads resulting from each DNA library were mapped to the markers of the MetaPhlAn database using the Bowtie2 v2.1.0 aligner (23) with default parameters and a sensitive global alignment strategy (default --end-to-end mode). For those published datasets sequenced on the GA Illumina analyzer the Bowtie2 option --solexa-quals was used. Before running MetaPhlAn, PCR duplicates were removed from each DNA library. For the paired-end sequenced samples CGG10022 and CGG10023, we used a modified version of the filtering program used for the Neanderthal draft genome (*FilterUniqueBAM.py*) (24). Uncollapsed PE reads were not used. For all remaining single-end datasets, PCR duplicates were first identified using the MarkDuplicates function of Picard Tools version 1.82 (<http://picard.sourceforge.net/>) and then removed with the SAMtools "view" command (15) as described in Der Sarkissian et al. 2014 (21).

In order to identify potential biases, we compared microbial profiles characterized from three different types of DNA library procedures: A-tailing DNA libraries (AT) (1, 25), modified TruSeq DNA libraries (TS) (9) and blunt ended DNA libraries (KM) (8) (Supplementary Table S9).

We compared taxon abundances among DNA libraries using a suite of analyses in the statistical environment R version 3.0.1 (26) as described previously (10, 21). In order to reduce the rate of false positives, we excluded low-abundance taxa (less than 1%). Shannon diversity indices were computed from relative abundance data using the function *diversity* of the *vegan* package in R (<http://cran.r-project.org/package=vegan>). A two-sample t-test was carried out to compare the diversity of A-tailing (AT) libraries versus blunt ended (KM) DNA libraries from the distribution of Shannon indices. TruSeq (TS) libraries were excluded from this test as only one TS library was available. Principal Coordinate Analysis (PCoA, R function *pcoa*) was performed using Bray-Curtis distances among profiles. We carried out hierarchical clustering using the R package *pvclust*, based on the Manhattan metric and average linkage clustering method (27), with 10,000 bootstrap iterations to estimate cluster support (Approximately Unbiased *p-values* and Bootstrap Probabilities).

The CGG10022 and CGG10023 ancient horse sample microbial profiles were also compared with profiles of soil (28) and human samples (29) by PCoA based on Bray-Curtis distances. The soil and human comparative MetaPhlAn profiles are publicly available (21, 29).

### S1.8.2 Results

*Actinobacteria* (8-96%) is the dominant class across the ancient horse microbial profiles (Supplementary Figure S7). It was also detected at high frequencies in CGG10022 (15-35%) and CGG10023 (29-59%). The *Alphaproteobacteria* (1-72%) and the *Gammaproteobacteria* (1-36%) classes were broadly found in the ancient horses extracts, as well as in CGG10022 (3-19% and 45-61%) and CGG10023 (30-38% and 4-17%). The *Betaproteobacteria* (0-7%) and *Sphingobacteria* (9-36%) classes have also been detected in CGG10022, and CGG10023's microbial profiles showed occurrence of members of the *Flavobacteria* (0-2%), *Sphingobacteria* (1-2%), *Betaproteobacteria* (1-12%) and *Deltaproteobacteria* (0-1%) classes.

On the basis of genus-level relative abundances, ancient horse microbial profiles segregated into two main clusters (Supplementary Figure S8), with each of CGG10022 and CGG10023 belonging to one cluster, and the samples CGG101394 and CGG10028 grouping out. This structure of the microbial diversity is in line with previous results described in Der Sarkissian et al. 2014 (21). Hierarchical clustering and PCoA (Supplementary Figure S8 and Supplementary Figure S9) show that the variability in the profiles obtained between DNA libraries of a given sample is smaller than that between any two samples from distinct clusters, thus suggesting a negligible impact of the DNA library building method on the distribution of the microbial diversity among samples. In line with this result, Shannon diversity indices calculated from AT-libraries (mean: 1.9, standard deviation: 0.53) and from KM-libraries (mean: 2.2, standard deviation: 0.36) showed no statistically significant differences on the basis of the t-test (*p-value*: *p-value*: 0.14). In addition, the presence of different groups of ancient horse microbial profiles does not support an extensive contamination of all the ancient horse extracts, which would have masked any difference among samples. In addition PCoA support low levels of human-derived contamination (Supplementary Figure S10), as the CGG10022 and CGG10023 microbial profiles are found to be distinct from human-associated microbiomes, but similar to soil samples. Overall, the dominant microorganisms detected in the ancient horse samples (*Mycobacterium*: 2-63%, *Pseudomonas*: 0-60%, *Rhodopseudomonas*: 0-60%, and *Arthrobacter*: 0-43%) indeed belong to genera commonly found in soils (28). This is in accordance with previous results suggesting that the diversity observed in microbe-derived DNA reads sequenced in the ancient horse remains derives from *post-mortem* colonisation by microorganisms of the depositional environment (21).

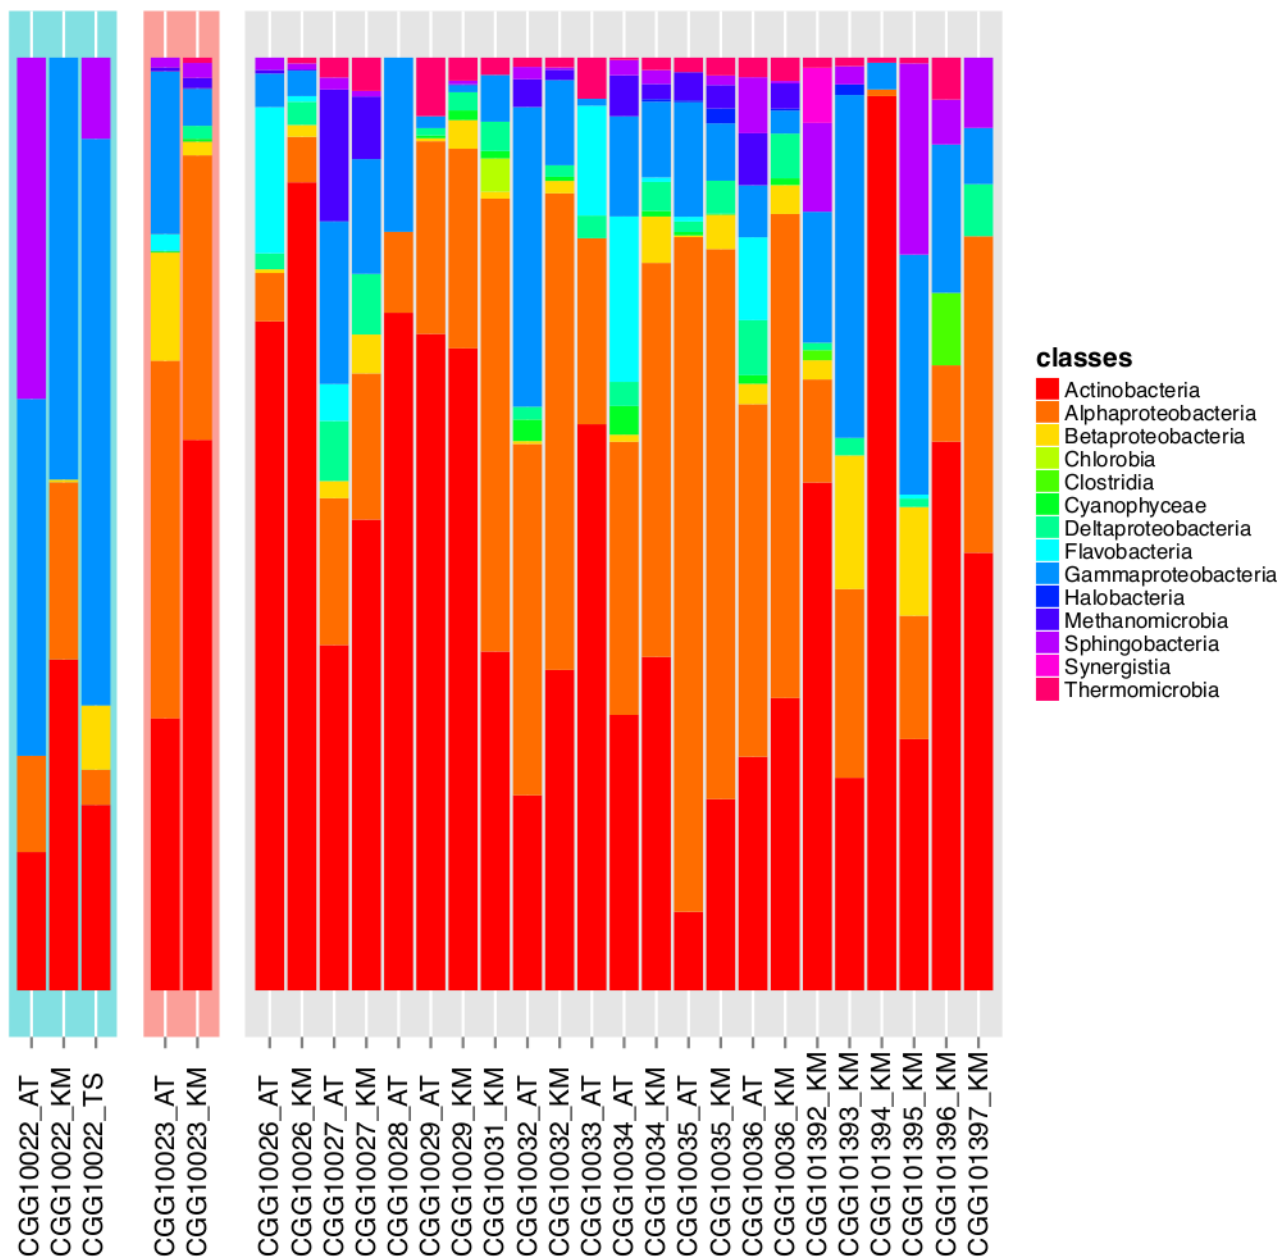

**Supplementary Figure S7. Relative abundances of microbial classes in ancient horse DNA extracts**

AT=A-tailing DNA library procedure described in Orlando et al 2013 (1). TS=Modified TruSeq DNA library building procedure described in Pedersen et al. 2014 (9). KM=DNA library building procedure from Meyer and Kircher 2010 (8).



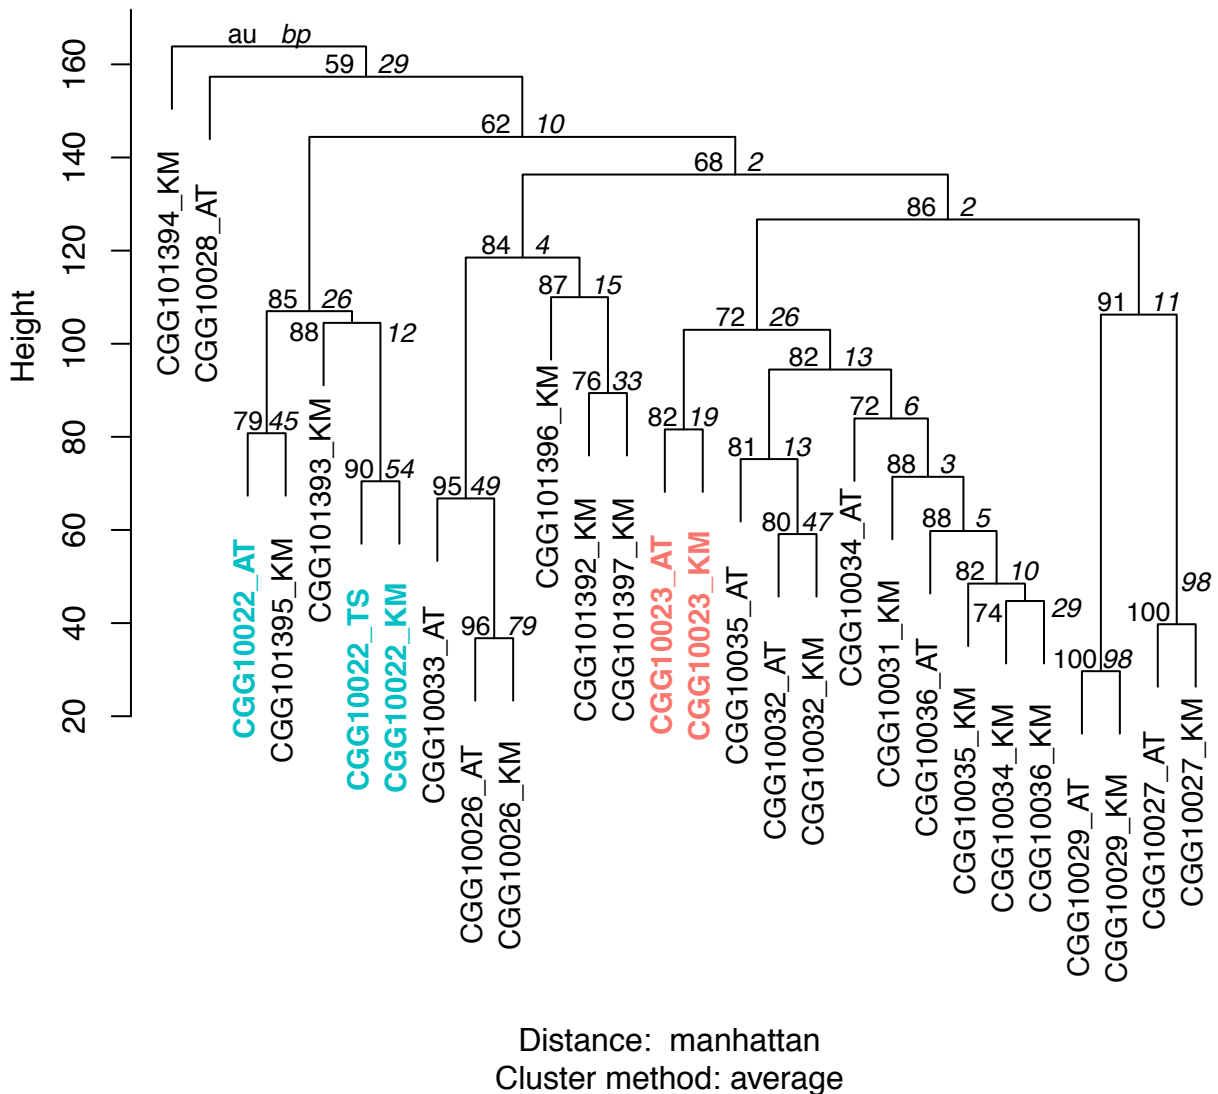

**Supplementary Figure S8. Hierarchical clustering of Manhattan distances between microbial DNA profiles at the genus level in ancient horse extracts (10,000 bootstraps).**

AT=A-tailing DNA library procedure described in Orlando et al 2013 (1). TS= modified TruSeq DNA library building procedure described in Pedersen et al. 2014 (9). KM= DNA library building procedure from Meyer and Kircher 2010 (8); “au”, approximately unbiased p-value; “bp”, bootstrap probability.

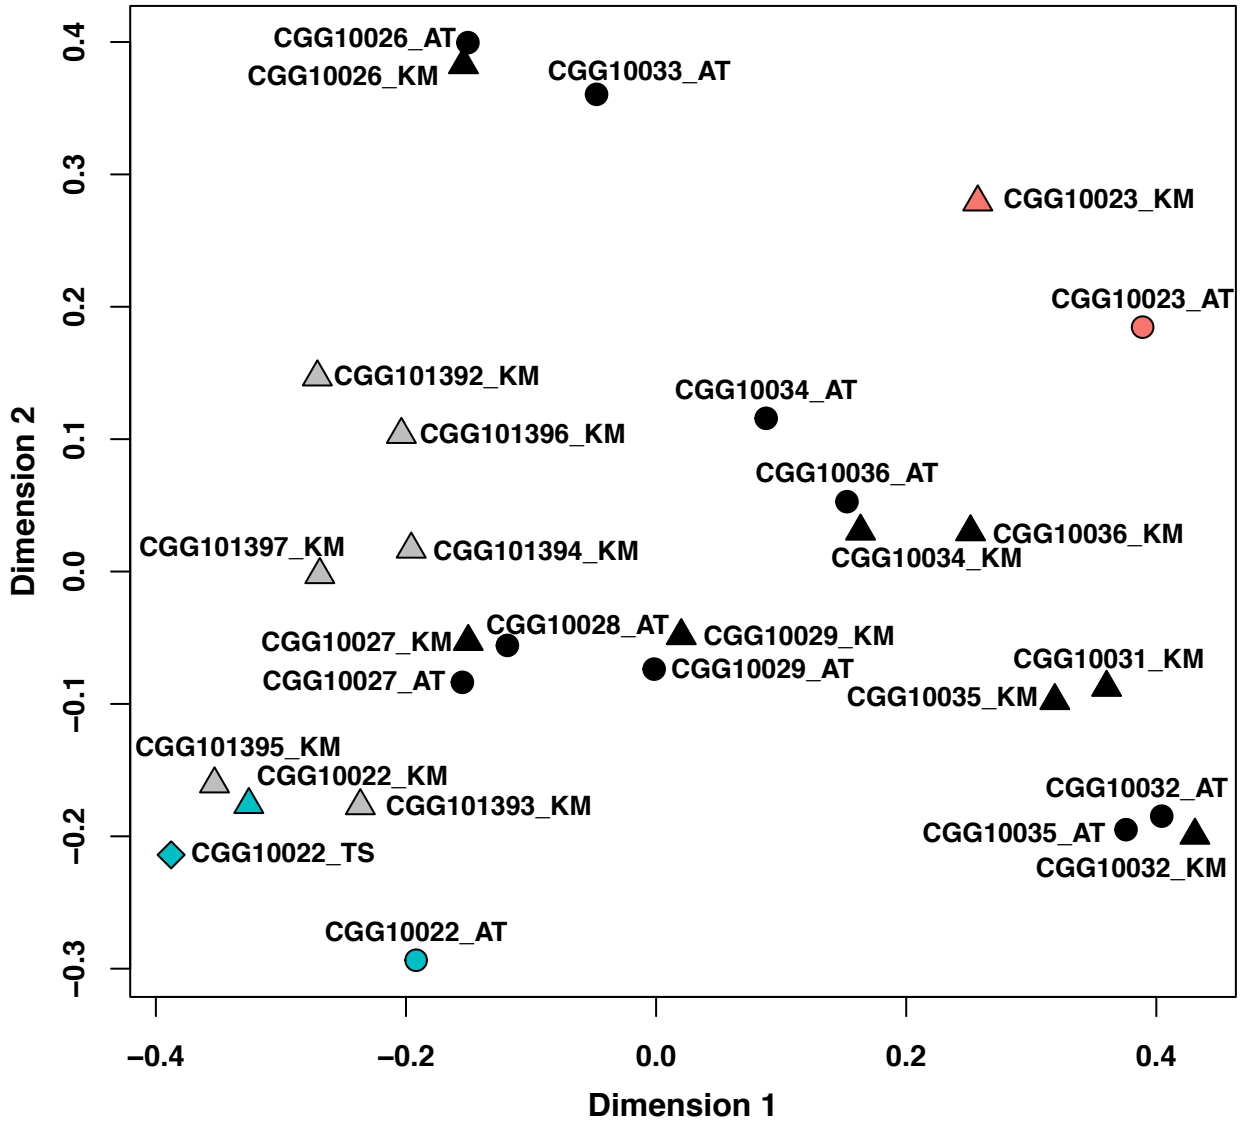

**Supplementary Figure S9. Principal Coordinate Analysis of Bray-Curtis distances between microbial DNA profiles at the genus level in ancient horse extracts.**

AT=A-tailing DNA library procedure described in Orlando et al 2013 (1). TS= modified TruSeq DNA library building procedure described in Pedersen et al. 2014 (9). KM= DNA library building procedure from Meyer and Kircher 2010 (8).

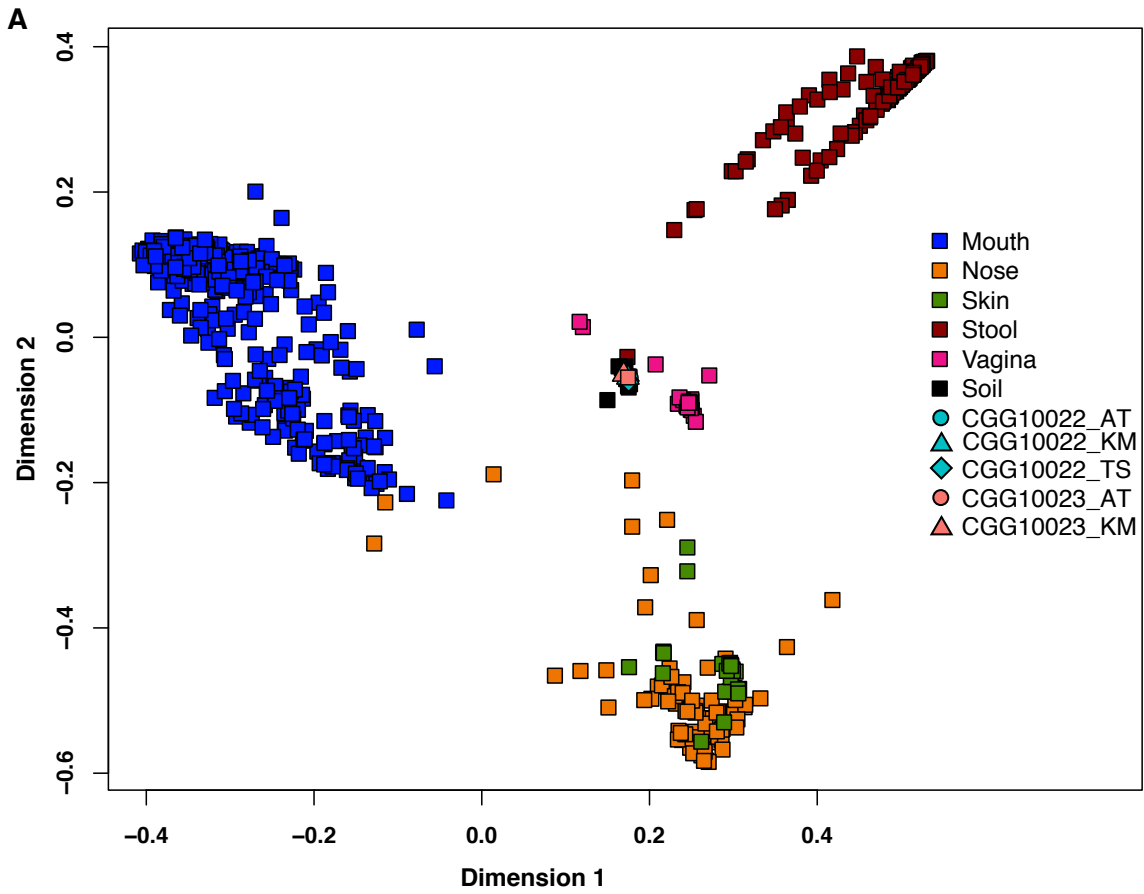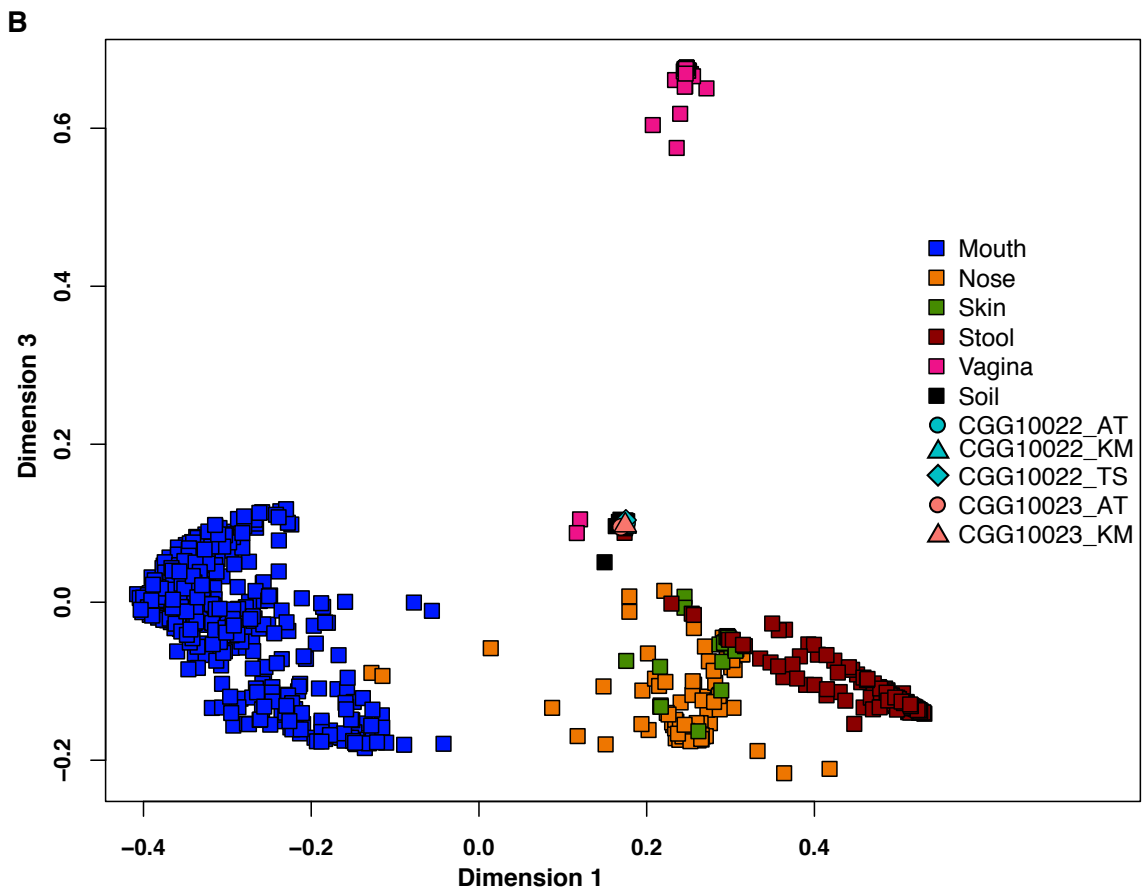

**Supplementary Figure S10. Principal Coordinate Analysis of Bray-Curtis distances between microbial DNA profiles at the genus level in various human associated microbiomes, soils, and the ancient horse extracts CGG10022 and CGG10023**

AT=A-tailing DNA library procedure described in Orlando et al 2013 (1). TS= modified TruSeq DNA library building procedure described in Pedersen et al. 2014 (9). KM= DNA library building procedure from Meyer and Kircher 2010 (8). A. Dimensions 1 and 2. B. Dimensions 1 and 3.

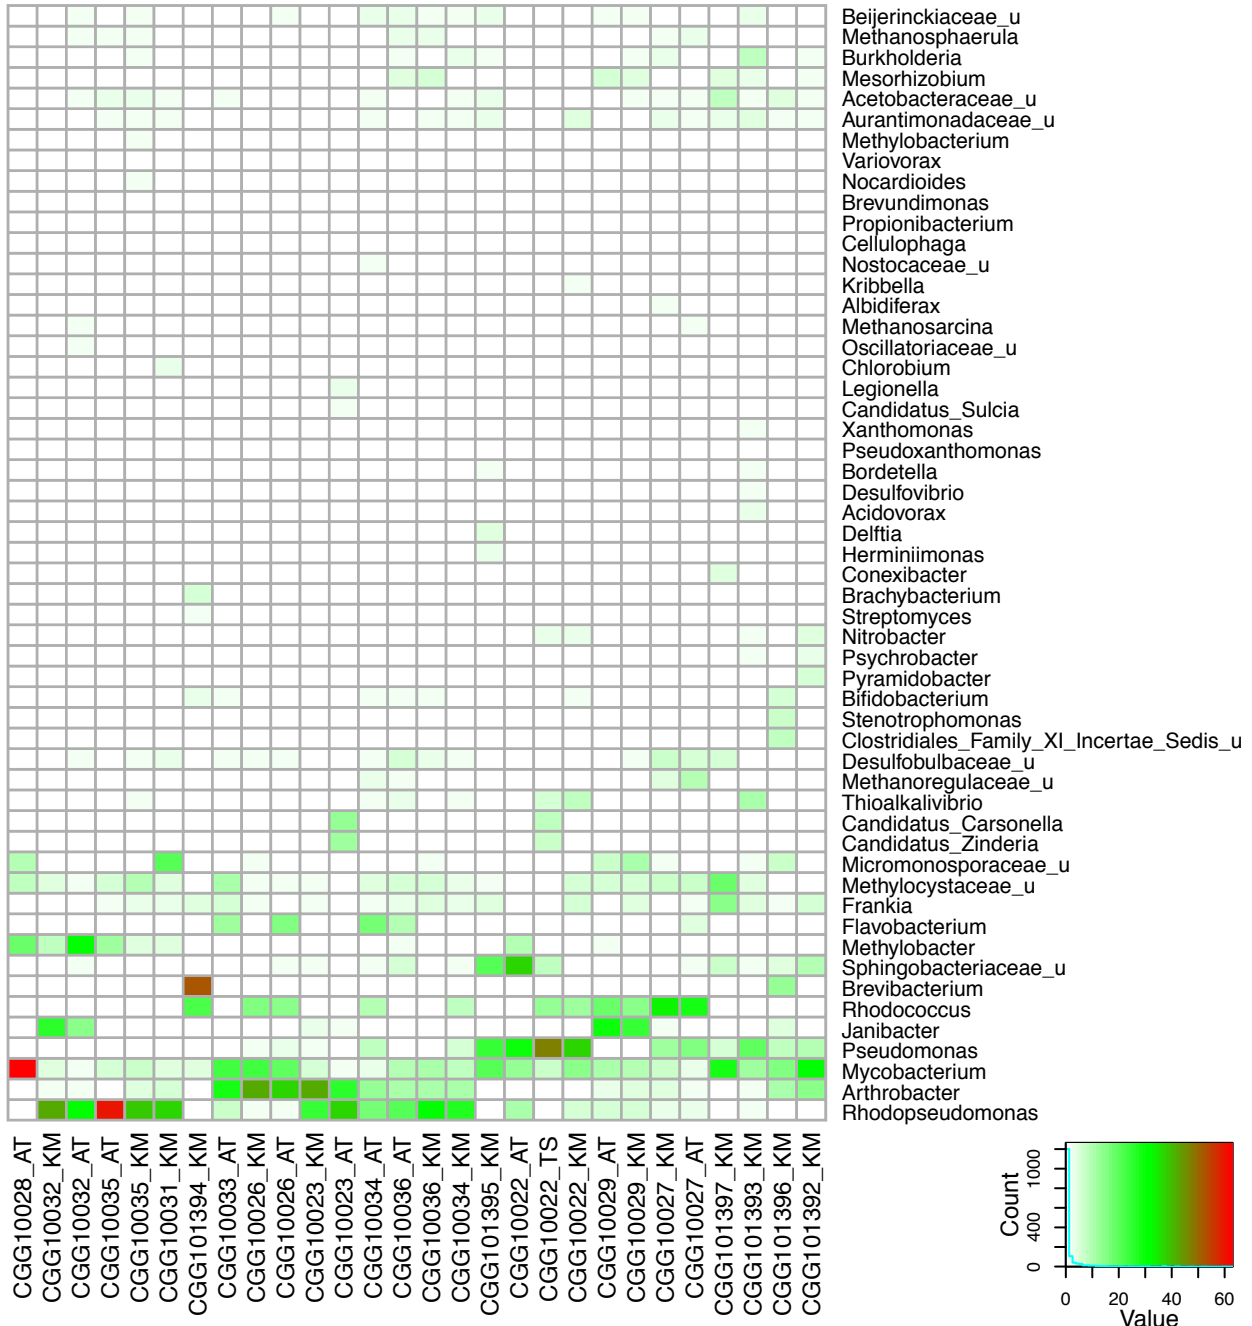

**Supplementary Figure S11. Heatmap showing relative abundances of microbial genera in ancient horse DNA extracts**

“\_u”, unclassified, AT=A-tailing DNA library procedure described in Orlando et al 2013 (1). TS= modified TruSeq DNA library building procedure described in Pedersen et al. 2014 (9). KM= DNA library building procedure from Meyer and Kircher 2010 (8).

| Sample              | Library building method | Identifier / Platform        | #Trimmed reads | #Genera | Shannon diversity |
|---------------------|-------------------------|------------------------------|----------------|---------|-------------------|
| CGG10022            | KM                      | ACTTGA <sup>a</sup>          | 49,964,648     | 11      | 2.0               |
|                     | AT                      | CGTAGT <sup>a</sup>          | 26,525,706     | 6       | 1.5               |
|                     |                         | CGTAGT <sup>a</sup>          | 17,699,174     |         |                   |
|                     | TS                      | CTTGTA <sup>a</sup>          | 37,496,212     | 6       | 1.7               |
| TGACCA <sup>a</sup> |                         | 29,601,721                   |                |         |                   |
| CGG10023            | AT                      | Lib1 <sup>a</sup>            | 1,939,920,220  | 5       | 1.7               |
|                     |                         | Lib12 <sup>a</sup>           | 387,303,645    |         |                   |
|                     | KM                      | LOb <sup>a</sup>             | 223,066,616    | 9       | 1.9               |
|                     |                         | LOc <sup>a</sup>             | 204,005,371    |         |                   |
|                     |                         | LOd <sup>a</sup>             | 387,303,645    |         |                   |
| CGG10026            | AT                      | CGG10026_s <sup>a</sup>      | 27,529,781     | 10      | 1.8               |
|                     | KM                      | CGG10026_TAGCTT <sup>a</sup> | 19,951,256     | 9       | 1.8               |
| CGG10027            | AT                      | CGG10027_s <sup>a</sup>      | 17,945,473     | 18      | 2.5               |
|                     |                         | CCG10027_a <sup>a</sup>      | 87,405,232     |         |                   |
|                     |                         | CGG10027_GA <sup>b</sup>     | 11,966,997     |         |                   |
|                     | KM                      | CGG10027_GGCTAC <sup>a</sup> | 30,132,473     | 15      | 2.4               |
| CGG10028            | AT                      | CGG10028_s <sup>a</sup>      | 9,823,131      | 4       | 1.0               |
| CGG10029            | AT                      | CGG10029_s <sup>a</sup>      | 27,277,717     | 13      | 2.1               |
|                     | KM                      | CGG10029_CTTGTA <sup>a</sup> | 21,064,242     | 11      | 2.5               |
| CGG10031            | KM                      | CGG10031_CTATCA <sup>a</sup> | 50,436,657     | 13      | 2.1               |
| CGG10032            | AT                      | CGG10032_s <sup>a</sup>      | 14,597,524     | 14      | 1.9               |
|                     |                         | CGG10032_GA <sup>b</sup>     | 15,781,540     |         |                   |
|                     | KM                      | CGG10032_CGCTAT <sup>a</sup> | 50,306,194     | 8       | 1.8               |
| CGG10033            | AT                      | CGG10033_s <sup>a</sup>      | 5,113,925      | 9       | 1.9               |
|                     |                         | CGG10033_GA <sup>b</sup>     | 11,439,325     |         |                   |
| CGG10034            | AT                      | CGG10034_s <sup>a</sup>      | 29,667,651     | 17      | 2.7               |
|                     | KM                      | CGG10034_CGTATA <sup>a</sup> | 76,350,016     | 20      | 2.7               |
| CGG10035            | AT                      | CGG10035_AT <sup>a</sup>     | 23,567,250     | 10      | 1.5               |
|                     | KM                      | CGG10035_TGATCG <sup>a</sup> | 44,525,214     | 17      | 2.4               |
| CGG10036            | AT                      | CGG10036_s <sup>a</sup>      | 29,740,941     | 14      | 2.7               |
|                     | KM                      | CGG10036_GTGTAT <sup>a</sup> | 73,775,803     | 18      | 2.5               |
| CGG101392           | KM                      | OSRE <sup>a</sup>            | 16,400,000     | 20      | 2.26              |
| CGG101393           | KM                      | BaBRE <sup>a</sup>           | 9,800,000      | 31      | 2.84              |
| CGG101394           | KM                      | YaRE <sup>a</sup>            | 7,200,000      | 16      | 1.54              |
| CGG101395           | KM                      | TyRE <sup>a</sup>            | 12,200,000     | 19      | 2.2               |
| CGG101396           | KM                      | TaRE <sup>a</sup>            | 29,400,000     | 18      | 2.56              |
| CGG101397           | KM                      | TuRE <sup>a</sup>            | 15,100,000     | 10      | 2.07              |

**Supplementary Table S9. Samples used for metagenomic analyses**

For Platform, a) indicates Illumina HiSeq 2000, and b) indicates Illumina Genome Analyzer IIx.

## S2 Phylogenetic and demographic analyses

### S2.1 Phylogenetic inference from mitochondrial sequences

Following mapping against the horse reference mitochondrial genome (Accession Nb. NC\_001640; see section S1.3), we prepared the mitochondrial genome sequence of samples CGG10022 and CGG10023 based on a majority rule at each covered position. Only positions covered by a minimum number of three independent unique reads showing base qualities greater or equal to 30 were called. The mitochondrial consensus sequences were then aligned to a total of 25 ancient horse mitochondrial sequences previously reported(1, 30) as well as to those from the eight modern horse specimens investigated here (see section S1.1) and to an additional number of 64 mitochondrial sequences collected from modern domestic breeds (see the labels of external branches on Supplementary Figure S12 for a list of Accession numbers). We partitioned the alignment into six main regions, namely: ribosomal RNA, tRNA, Control Region, and the first, second and third codon positions for CDS. We selected the best mutational model for each of those partitions using ModelGenerator v851 (31) and eight rate categories. The partitions and their corresponding mutational models were used for Bayesian phylogenetic inference with MrBayes (32), running two analyses in parallel, each with four MCMC chains. The final tree topology was recovered following a total number of 300,000,000 generations, sampling 1 every 1,000 generations and disregarding the first 25% as burn-in. The resulting tree, as drawn with MEGA v5.0 (33), is shown in Supplementary Figure S12.

The six partitions were also used as input for Bayesian skyride analyses in BEAST v1.8.0 (33), where we also used the radiocarbon dates (or stratigraphic context information) of the ancient specimens for tip calibration (when a range of dates was available, we chose the center of the proposed range as a date). Two types of analyses were run: In the first series of analysis, a strict clock was assumed whereas the second series of analyses assumed a log-Uncorrelated relaxed clock. For each type of analysis, we also applied three possible demographic models: we assumed that the population size remained constant, a Bayesian Skyride model or a Bayesian Skyline model. The analyses were run for 200 million generations, sampling 1 every 50,000 generations, and the first 10% were disregarded as burn-in. As Bayes Factor calculation supported the Bayesian Skyline model assuming log-Uncorrelated relaxed clock ( $7.764 \leq \log BF \leq 44.985$ ), we reconstructed the past demographic profile of horses using the Bayesian Skyline analysis based on this clock assumption (Supplementary Figure S14). We also used TreeStatv1.8.0 in order to recover the posterior distribution for the mitochondrial TMRCA of horses (Supplementary Table S10) and the final tree topology was recovered using FigTree, where node support is provided by the node posterior probability (Supplementary Figure S13).

|                                         | 5%       | Median          | 95%      |
|-----------------------------------------|----------|-----------------|----------|
| <b>Mutation Rate (per site per myr)</b> | 3.15E-08 | <b>4.68E-08</b> | 6.36E-05 |
| <b>TMRCA (yr BP)</b>                    | 104638   | <b>145617</b>   | 214694   |

**Supplementary Table S10. Posterior estimates of mt mutation rate and TMRCA of horses**

*We provide median, 5%- and 95%-quantile values of the posterior distribution sampled in BEAST using 10% as burn-in.*

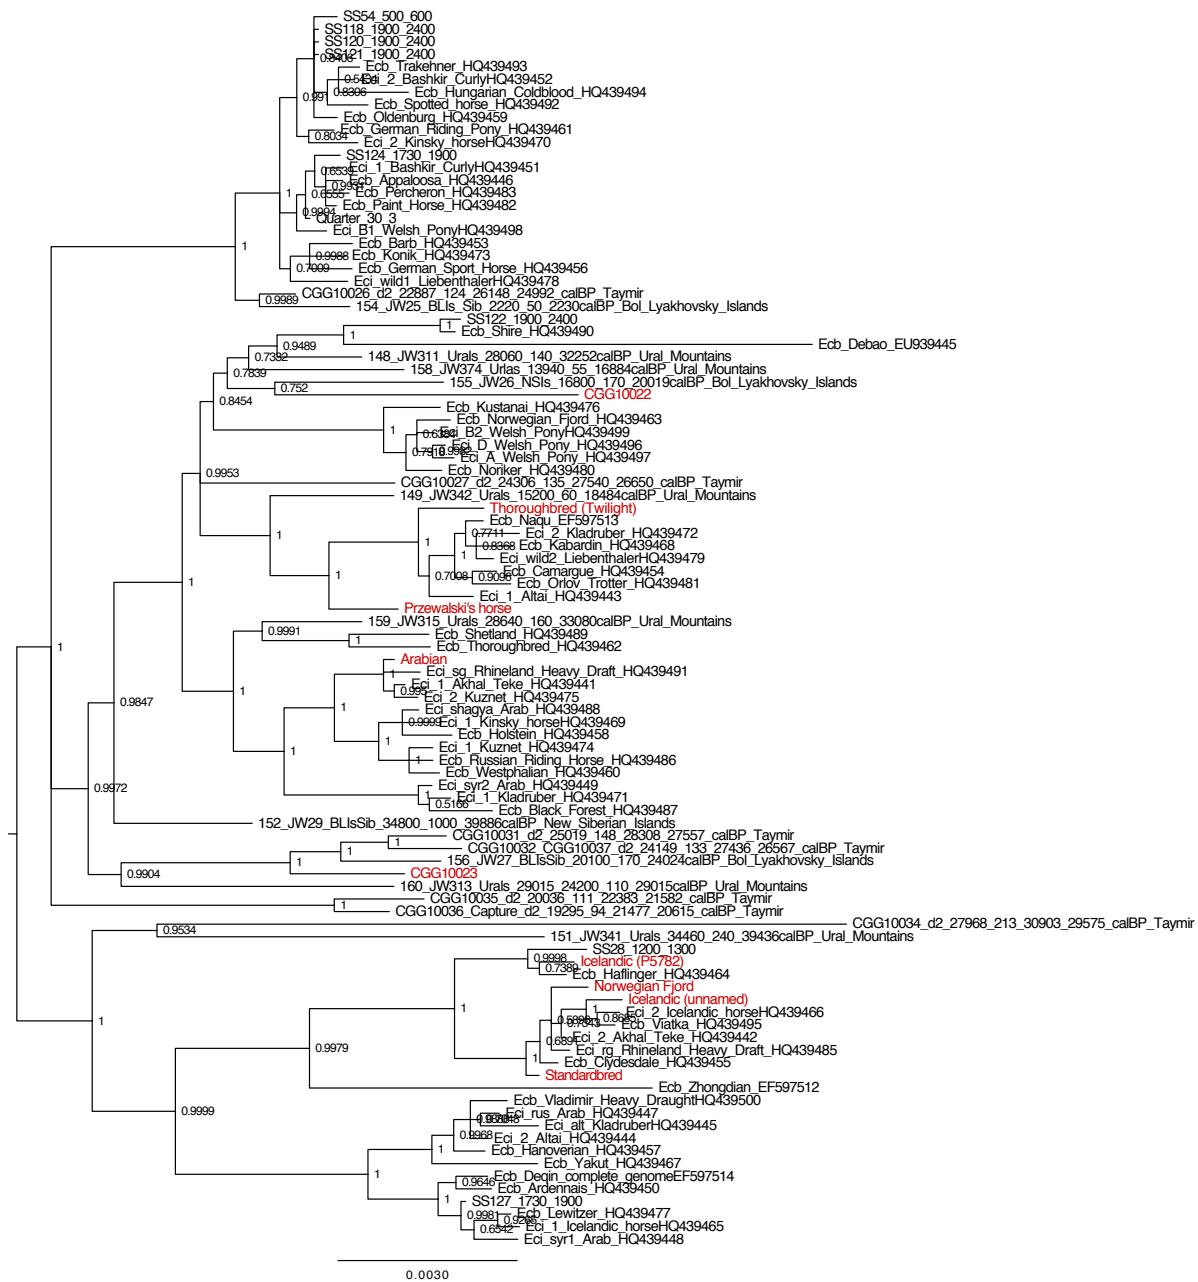

**Supplementary Figure S12. Bayesian phylogenetic reconstruction using MrBayes**

The labels of each external branch refer to the accession numbers of previously released modern mitochondrial genome sequences. Labels without an accession number refer to samples described in this study (those labeled in red; see Supplementary Section S1.1) or in the study by Orlando et al. 2013 (1). The tree is rooted on the midpoint.

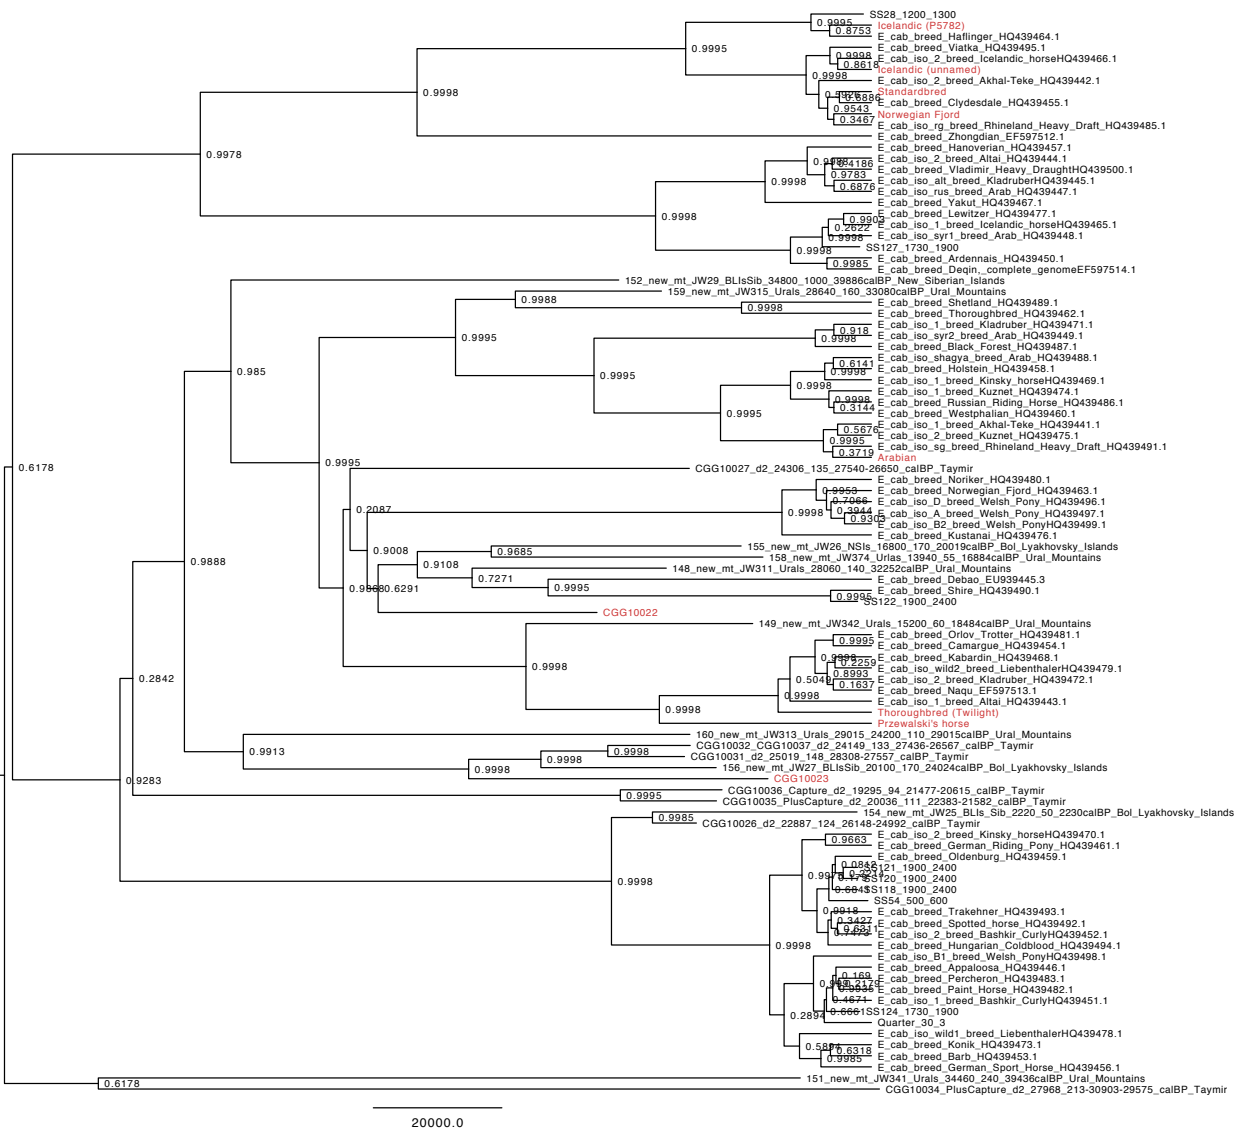

**Supplementary Figure S13. BEAST phylogenetic reconstruction**

The labels of each external branch refer to the accession numbers of previously released modern mitochondrial genome sequences. Labels without an accession number refer to samples described in this study (those labeled in red; see Supplementary Section S1.1) or in the study by Orlando et al. 2013 (1).



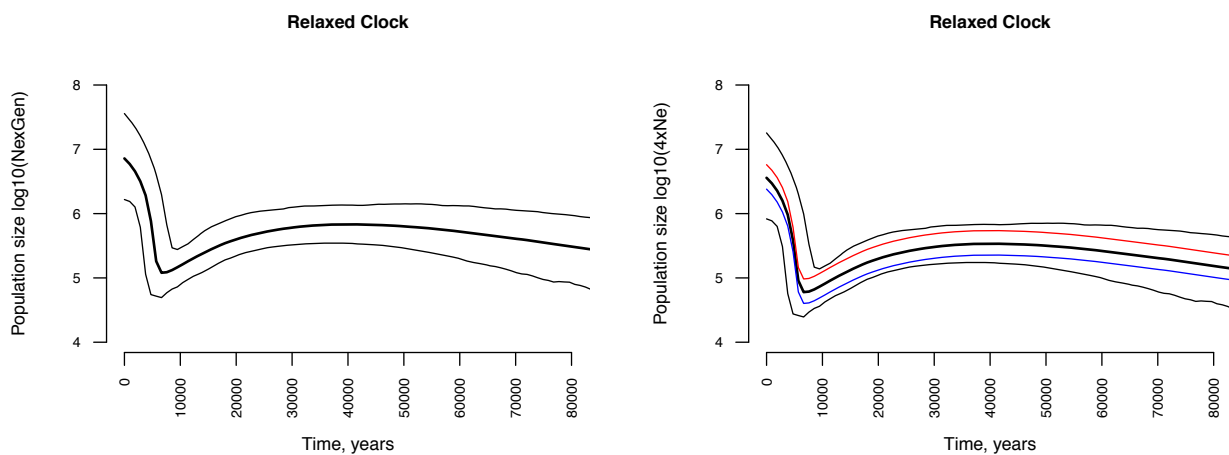

### Supplementary Figure S14. Bayesian skyline demographic profile

**Left:** The y-axis provides a  $\log_{10}$ -transformed measure of the product of the effective size and the generation time. Median values are indicated as thick lines, in contrast to the 5%-95% confidence range is indicated with plain thin lines. **Right:** Same as in the left panel, except that the y-axis now refers to the  $\log_{10}$ -transformed equivalent of the population size (i.e. 4 times the mitochondrial effective size), assuming a generation time of 8 years. Red and blue lines provide median estimates for the effective population size, assuming 5 years and 12 years as a generation time.

## S2.2 Median graph of chromosome Y sequences

Samples were mapped to the chrY contigs identified by Wallner *et al.* (34) (represented by sample HT1) and Lippold *et al.* (35) (excluding sequence G72337.1 due to overlap with the Wallner sequences), yielded a total of 193,857 bp of chrY sequences. Initial identification of candidate sequence alignments was carried out as described above (see Supplementary Section S1.3) using an index containing just these chrY contigs, excepting that quality and PCR duplicate filtering was not performed. Subsequently, these hits were re-mapped against the complete nuclear genome, with the addition of the chrY contigs, and filtering was carried out as described previously. Genotyping of the chrY contigs was carried out as described in Supplementary Section S2.5, excepting that a minimum depth of 4 and a maximum depth of 50 was used.

Scaffolds were merged into an unpartitioned supermatrix. The supermatrix was converted to RDF format using DNASP (36) v5.10.1. Median joining (37) was carried out using Network v4.612. The eight samples reported by Wallner *et al.* (34) (two Przewalski's horses and six domestic horses) were not included, as including these resulted in two distinct groups representing the samples from this study and the study Wallner *et al.* (34), a likely consequence of the (differing) systematic biases introduced by the sequencing techniques employed in the two studies (1, 34). The resulting graph matched the topology observed for the whole-genome phylogeny (Supplementary Figure S15).

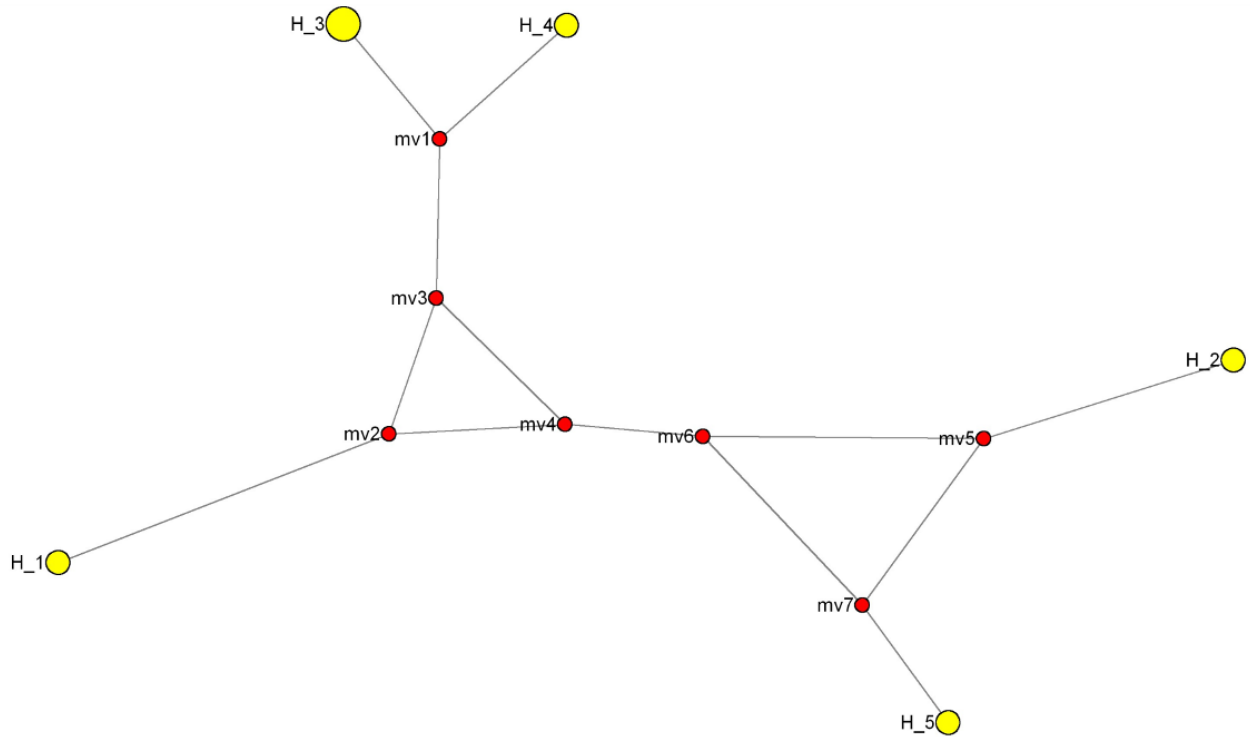

**Supplementary Figure S15. Median joining network of chrY sequences**

Median joining network based on 193,875 bp of chrY sequences; individual mutations are not shown. **H\_1**: Przewalski's horse; **H\_2**: CGG10022; **H\_3**: Icelandic horses (unnamed and P5782); **H\_4**: Standardbred; **H\_5**: Domestic donkey (Willy).

**S2.3 Principal Component Analysis and Procrustes Analysis**

BAM files containing the genomic coordinates of the sequenced reads mapped against EquCab2.0 were processed and converted to mpileup format by SAMTools (15). The mpileup files were used to call SNP variants following the quality filters described in Supplemental Section S2.5. We then considered the SNP variants that overlapped with the genomic coordinates covered by the equine SNP array and compared our ancient horses to the genetic diversity present amongst 9 Przewalski horses, as well as 14 (38) and 32 (39) domestic horse breeds, representing a total of 348 and 729 individuals, respectively. This resulted in the identification of 48,990 and 27,326 sites overlapping with the SNP dataset from McCue *et al.* 2012 for samples CGG10022 and CGG10023, respectively. A total of 46,672 and 25,977 sites were found in the SNP dataset from Petersen *et al.* 2013. Individual genotypes were converted into PLINK map and ped formats (40) and further analyzed using the software 'smartpca' of EIGENSOFT 4.0 (41). The first 10 eigen-vectors were calculated. Due to the significant lower number of sites covered for sample CGG10023, we combined our two ancient samples using a Procrustes transformation as implemented by the "proc" function of the CRAN library vegan (42). PCA plots were generated using R 2.12.2 (26) and were restricted to the first three principal components. Supplementary Figure S16 shows PCA plots for the first three principal components following Procrustes transformation and the analysis of the reference dataset from McCue *et al.* 2012. The same analysis was performed on the dataset from Petersen *et al.* 2013 and is shown as Supplementary Figure S17.

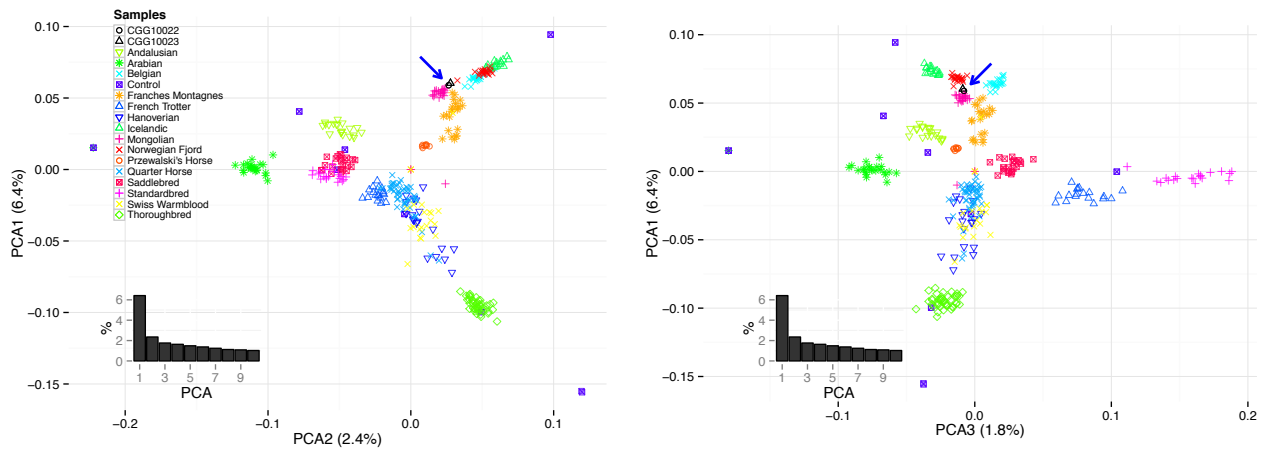

**Supplementary Figure S16. PCA analysis of pre-domesticated and McCue et al. horses**

Principal Component Analysis using 354 horses genotyped in McCue et al. 2012(38). The blue arrow indicates the position of the pre-domesticated samples CGG10022 and CGG10023. The barplot indicates the % of the variance explained by each of the principal components.

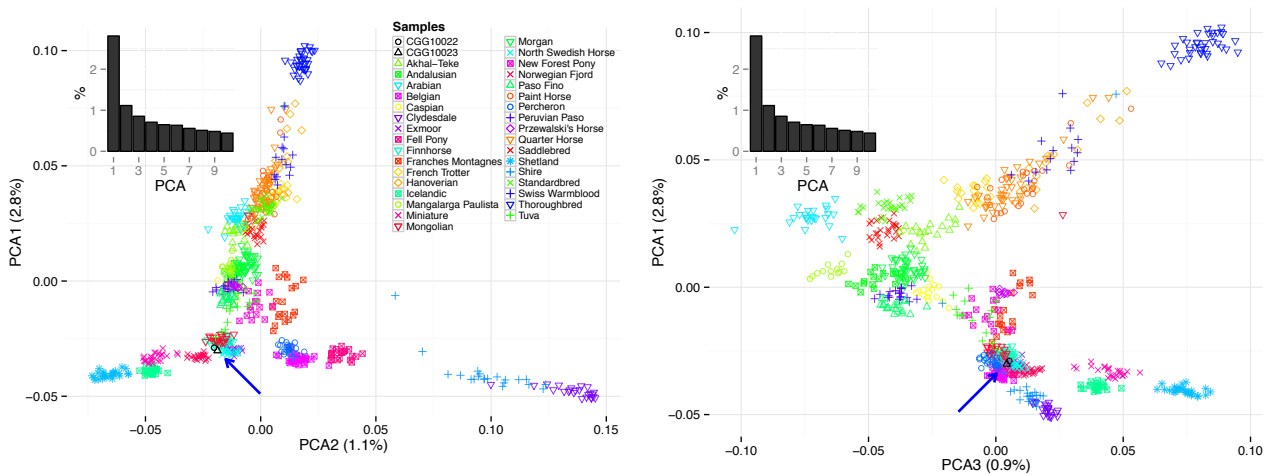

**Supplementary Figure S17. PCA analysis of pre-domesticated and Petersen et al. horses**

Principal Component Analysis using 354 horses genotyped in Petersen et al. 2013 (39). The blue arrow indicates the position of the pre-domesticated samples CGG10022 and CGG10023. The barplot indicates the % of the variance explained by each of the principal components.

## S2.4 Functional assessment of candidate SNPs

We screened the modern and ancient genomes investigated in this study for 50 loci associated with known diseases, coat coloration, and other phenotypical traits (Supplementary Table S11 and Supplementary Table S12), including phenotypes collected by Orlando *et al.* 2013 (1), Doan *et al.* 2012 (43), and the Mendelian Inheritance In Animals (OMIA) database (44). Genotyping was carried out as described in Supplementary Section S2.5; for sites in which the VCF record was filtered based on the criteria described in the same section, the total number of nucleotides observed at that site were tabulated as described in Orlando *et al.* 2013, *i.e.* excluding any nucleotide for which the base quality Phred score was < 35.

In the majority of cases, the two pre-domestic horses carry the reference allele; exceptions include alleles in the genes *ACN9*, *CKM*, and *COX4/1*, which are associated with racing performance, and which suggests that selection for racing performance on domestic horses acted on standing variation. While the derived allele for *CKM* and *COX4/1* is observed only for CGG10023, the derived allele for *ACN9* is observed for both CGG10022 and CGG10023.

Corroborating previous observations based on lower-coverage datasets for the pre-domesticated horse CGG10023 (1), this individual was found to be heterozygous for several loci involved body size (two loci in *PROP1*), known to be associated with dwarfism in domestic horses. Notable, this observation was further supported by the presence of derived alleles in CGG10022, which could not be included in its previous examination due to limited depth-of-coverage (1). It is noteworthy that both pre-domestic horses are heterozygous for SNPs located in *ZFAT*, all of which are associated with wither height in domestic horses. A fourth derived allele is observed only in CGG10022, for which the low coverage of CGG10022 (1 read) prevents genotyping.

The heterozygous allele observed in the *ZFAT* gene (chr9: 74,798,143) for the two pre-domesticated horses has been associated with a ~0.5 cm increase in height at the withers with regards to the deregressed estimated breeding values (dEBVs) (45). The exact effect of the other mutations observed in this gene has not been determined. None of the mutations known to be associated with various coat color phenotypes were observed for the pre-domesticated horses, preventing the determination of the coat color for these individuals. Nor were the mutations associated with spotting observed for these, nor in the Przewalski's horse, despite the fact that this phenotype is known to predate the domestication of horses (46, 47).

| Ref      | Chr | Coordinate  | Gene           | Phenotype                                                                         | Mutation     | ARA | CGG22 | CGG23 | FJO | ICE | P5782 | PRZ | STD | TWI | DON |
|----------|-----|-------------|----------------|-----------------------------------------------------------------------------------|--------------|-----|-------|-------|-----|-----|-------|-----|-----|-----|-----|
| (48)     | 1   | 74,842,283  | ACTN2          | Racing performance                                                                | A>G          | A/A | A/A   | A4    | A6  | A3  | A/A   | A/A | A/A | A/G | A/A |
| (49)     | 1   | 108,249,293 | TRPM1          | Leopard complex spotting and cation channel congenital stationary night blindness | C>T          | C/C | C/C   | C/C   | C/C | C/C | C/C   | C/C | C/C | C/C | C/C |
| (50)     | 1   | 128,056,148 | PPIB           | Hereditary equine dermal isomerase B asthenia                                     | G>A          | G/G | G/G   | G/G   | G/G | G5  | G/G   | G6  | G/G | G/G | G/G |
| (51)     | 1   | 138,235,715 | MYO5A          | Lavender foal syndrome                                                            | 1 bp del     | -   | -     | -     | -   | -   | -     | -   | -   | -   | -   |
| (52)     | 2   | 13,074,277  | TOE1           | Cerebellar abiotrophy                                                             | G>A          | C/C | C/C   | C/C   | C/C | C/C | C/C   | C5  | C/C | C/C | C/C |
| (48)     | 3   | 32,772,871  | COX4/1         | Racing performance                                                                | C>T          | C/C | C/C   | C1,T5 | C/T | C/C | T/T   | C/T | C/T | C/C | C/C |
| (53)     | 3   | 36,259,552  | MC1R           | Chestnut coat color                                                               | C>T          | C/T | C/C   | C/C   | C/T | C/T | T/T   | C/C | C/T | C/C | C/C |
| (54)     | 3   | 36,259,554  | MC1R           | Chestnut coat color                                                               | G>A          | G/G | G/G   | G/G   | G/G | G/G | G/G   | G/G | G/G | G/G | G/G |
| (55)     | 3   | 77,735,520  | KIT            | Sabino spotting                                                                   | A>T          | A2  | A/A   | A1    | A5  | A/A | A/A   | A1  | A/A | A/A | A/A |
| (56)     | 3   | 77,740,163  | KIT            | Tobiano spotting pattern                                                          | G>A          | G/G | G/G   | G/G   | G/G | G/G | G/G   | G/G | G/G | G/G | G/G |
| (45, 57) | 3   | 105,547,002 | LCORL1 / NCAPG | Larger body size                                                                  | T>C          | T/T | T/T   | T7    | T/T | T/T | T/T   | T/T | T/T | T/T | T/T |
| (48)     | 4   | 38,697,145  | PON1           | Racing performance                                                                | C>T          | C/C | C/C   | C/C   | C/C | C/C | C/C   | C/C | T/T | C/T | C/C |
| (48)     | 4   | 38,969,307  | PDK4           | Racing performance                                                                | C>A          | C/C | C/C   | C5    | C3  | C/C | C/C   | C3  | C/C | A/C | A/A |
| (48)     | 4   | 38,973,231  | PDK4           | Racing performance                                                                | G>A          | G/G | G/G   | G3    | G3  | G5  | A/G   | G7  | G/G | A/G | A/A |
| (48)     | 4   | 40,279,726  | ACN9           | Racing performance                                                                | C>T          | C/C | C/T   | C/T   | C/C | T/T | C/T   | C/C | T/T | C/T | T/T |
| (58)     | 4   | 96,375,588  | CLCN1          | Congenital myotonia                                                               | A>C          | A/A | A/A   | A/A   | A/A | A/A | A/A   | A/A | A/A | A/A | A6  |
| (59)     | 5   | 20,256,789  | LAMC2          | Junctional epidermolysis bullosa                                                  | 1 C ins      | -   | -     | -     | -   | -   | -     | -   | -   | -   | -   |
| (60, 61) | 6   | 11,429,753  | PAX3           | Splashed white coat                                                               | C>T          | C/C | C/C   | C/C   | C7  | C7  | C/C   | C/C | C/C | C/C | C5  |
| (62)     | 6   | 73,665,304  | PMEL17         | Silver coat color                                                                 | G>A          | G/G | G/G   | G/G   | G/G | G2  | G/G   | G/G | G/G | G/G | G/G |
| (57)     | 6   | 81,481,065  | HMGA2          | Larger body size                                                                  | C>T          | T2  | C2    | C4    | T2  | T4  | T/T   | T4  | C/T | C/T | C/C |
| (63)     | 8   | 45,603,643  | LAMA3          | Junctional epidermolysis bullosa                                                  | 6,589 bp del | -   | -     | -     | -   | -   | -     | -   | -   | -   | -   |
| (64)     | 9   | 35,528,429  | DNAPK          | Severe combined immunodeficiency                                                  | 5bp del      | -   | -     | -     | -   | -   | -     | -   | -   | -   | -   |
| (45)     | 9   | 74,795,013  | ZFAT           | Wither height                                                                     | C>T          | T/T | C/T   | C1,T1 | C/C | T/T | C/C   | C/T | C/C | C/C | C/C |
| (45)     | 9   | 74,795,089  | ZFAT           | Wither height                                                                     | C>A          | A/A | A/C   | C1    | C/C | A3  | C/C   | A/C | C/C | C/C | C/C |
| (45)     | 9   | 74,795,236  | ZFAT           | Wither height                                                                     | G>A          | A/A | A/G   | A3,G4 | G/G | A/A | G/G   | A/G | G/G | G/G | C2  |
| (45)     | 9   | 74,798,143  | ZFAT           | Wither height                                                                     | G>A          | A/A | A/G   | A/G   | G/G | A/A | G/G   | A/G | G/G | G/G | G/G |
| (57)     | 9   | 75,550,059  | ZFAT           | Larger body size                                                                  | C>T          | C/C | C/C   | C/C   | C/C | C1  | C/C   | C/C | C/T | T/T | C/C |

**Supplementary Table S11. Functional assessment of SNPs in horses and the domestic donkey (chromosomes 1 – 9)**

The following abbreviations are used; **ARA**bian, Norwegian **FJO**rd, **ICE**landic (unnamed), Icelandic (**P5782**), **ST**andardbred, **THO**roughbred (Twilight), **CGG10022**, **CGG10023**, **PRZ**ewalski, and domestic **DON**key (Willy).

| Ref      | Chr | Coordinate | Gene           | Phenotype                                        | Mutation   | ARA | CGG22 | CGG23 | FJO | ICE       | P5782 | PRZ | STD | TWI | DON |
|----------|-----|------------|----------------|--------------------------------------------------|------------|-----|-------|-------|-----|-----------|-------|-----|-----|-----|-----|
| (65)     | 10  | 9,554,699  | <i>RYR1</i>    | Malignant hyperthermia                           | C>G        | C7  | C/C   | C/C   | C/C | C/C       | C/C   | C/C | C/C | C/C | C/C |
| (66)     | 10  | 15,884,567 | <i>CKM</i>     | Racing performance                               | G>A        | A/G | G/G   | A/G   | A/G | A3,G<br>1 | A/A   | G/G | G/G | A/G | G4  |
| (38)     | 10  | 18,940,324 | <i>GYS1</i>    | Polysaccharide storage myopathy                  | C>T        | C/C | C/C   | C/C   | C/C | C/C       | C/C   | C/C | C/C | C/C | C/C |
| (67)     | 11  | 15,500,439 | <i>SCN4A</i>   | Equine hyperkalemic periodic paralysis           | C>T        | C/C | C/C   | C/C   | C/C | C/C       | C/C   | C/C | C/C | C/C | C/C |
| (68)     | 11  | 19,184,674 | <i>ITGA2B</i>  | Glanzmann Thrombasthenia                         | Del 10 bp  | -   | -     | -     | -   | -         | -     | -   | -   | -   | -   |
| (57)     | 11  | 23,259,732 | <i>LASP1</i>   | Larger body size                                 | G>A        | G/G | G/G   | G4    | G4  | A6        | G/G   | A6  | G/G | G1  | G/G |
| (69)     | 14  | 3,761,254  | <i>PROP1</i>   | Dwarfism                                         | G>C        | G/G | C/G   | C4,G2 | C/G | G/G       | C/G   | G/G | G/G | G/G | G/G |
| (69)     | 14  | 3,761,355  | <i>PROP1</i>   | Dwarfism                                         | T>C        | T/T | C/C   | C4,T2 | C/T | T/T       | C/T   | T/T | T4  | T/T | C/C |
| (69)     | 14  | 5,418,619  | <i>ND</i>      | Dwarfism                                         | G>A        | G/G | G/G   | G/G   | G/G | G/G       | A/A   | A/G | G/G | A/G | G/G |
| (70)     | 14  | 26,701,092 | <i>SLC36A1</i> | Champagne dilution                               | G>C        | G/G | G/G   | G/G   | G/G | G/G       | G/G   | G/G | G/G | G/G | G/G |
| (71)     | 14  | 27,991,841 | <i>SCL26A2</i> | Autosomal recessively inherited chondrodysplasia | A>G        | G/G | G/G   | G4    | G/G | G/G       | G/G   | G/G | G/G | A/G | G/G |
| (60, 61) | 16  | 20,103,081 | <i>MITF</i>    | Macchiato, hearing loss                          | T>C        | T6  | T/T   | T/T   | T/T | T3        | T/T   | T/T | T/T | T/T | T/T |
| (60, 61) | 16  | 20,105,348 | <i>MITF</i>    | Splashed white coat                              | 5 bp del   | -   | -     | -     | -   | -         | -     | -   | -   | -   | -   |
| (60, 61) | 16  | 20,117,302 | <i>MITF</i>    | Splashed white coat                              | 11bp indel | -   | -     | -     | -   | -         | -     | -   | -   | -   | -   |
| (72)     | 17  | 50,624,658 | <i>EDNRB</i>   | Lethal white foal syndrome                       | GA>CT      | -   | -     | -     | -   | -         | -     | -   | -   | -   | -   |
| (73, 74) | 18  | 66,493,737 | <i>MSTN</i>    | Optimum racing distance                          | T>C        | T7  | T7    | T7    | T3  | T4        | T/T   | T4  | T4  | T/T | T/T |
| (75)     | 21  | 30,666,626 | <i>SLC45A2</i> | Cream coat color                                 | G>A        | G/G | G/G   | G/G   | G/G | G2        | G/G   | G/G | G/G | G/G | G/G |
| (66)     | 22  | 22,684,390 | <i>COX4/2</i>  | Racing performance                               | C>T        | C/T | C/C   | C/C   | C/C | C/C       | C/C   | C/C | C/C | C/T | C/C |
| (76)     | 22  | 25,168,567 | <i>ASIP</i>    | Black and bay color                              | Del 11 bp  | -   | -     | -     | -   | -         | -/+   | -   | -   | -   | -   |
| (2)      | 23  | 22,999,655 | <i>DMRT3</i>   | Pattern of locomotion (altered gait)             | C>A        | C/C | C/C   | C/C   | C/C | A4        | C/C   | C/C | A/A | C/C | C/C |
| (77)     | 26  | 30,660,224 | <i>SLC5A3</i>  | Foal immunodeficiency syndrome                   | C>T        | C/C | C/C   | C/C   | C7  | C/C       | C/C   | C/C | C/C | C/C | C3  |
| (78)     | X   | 49,635,250 | <i>AR</i>      | Androgen insensitivity syndrome (AIS)            | A>G        | A/A | A/A   | A/A   | A7  | A1        | A/A   | A1  | A/A | A/A | A2  |
| (79)     | X   | 122,833,88 | <i>IKBK</i>    | Incontinentia pigmenti                           | C>T        | C/C | C/C   | C/C   | C/C | C/C       | C/C   | C/C | C4  | C/C | C4  |

**Supplementary Table S12. Functional assessment of SNPs in horses and the domestic donkey (chromosomes 10 – X)**

The following abbreviations are used; **ARA**bian, Norwegian **FJO**rd, **ICE**landic (unnamed), Icelandic (**P5782**), **ST**andardbred, **THO**roughbred (Twilight), **CGG10022**, **CGG10023**, **PRZ**ewalski, and domestic **DON**key (Willy).

## S2.5 Phylogenetic inference using super-matrix of nuclear coding sequences

Phylogenetic inference was carried out using a partitioned supermatrix of the coding sequences of protein-coding genes from Ensembl v72 (80); the longest transcript was selected for each gene, excluding any transcript for which the CDS was not divisible by 3; consequently 55 of 20,449 genes were excluded. Subsequently, a small subset of very poorly covered genes (10 in total) found to cause failures during bootstrapping, due to sampling generating alignments in which one or more nucleotide types were entirely absent, were excluded. The final selection included 20,384 genes out of 20,449 protein-coding genes included in the Ensemble release.

Genotyping was performed as described previously [Orlando *et al.* 2013, see their Supplementary Information, section S8.3] (1) using the PALEOMIX pipeline (10), with few modifications: Firstly, the maximum depth of coverage per site was set to  $> 0.995$  of the coverage distribution (excluding sites with depth 0; Supplementary Table S13) for the sample being genotyped, and secondly, no filtering of singletons was done for the pre-domesticated horses. Variant, reference sites, and indels were called, but indels were only used to filter SNPs adjacent to indels, and not included in the final sequences, and no multiple-sequence alignment was done following genotyping. Sites containing heterozygous SNPs were represented using the standard IUPAC codes (81). The sequences were subsequently merged into a partitioned super-matrix, with two partitions for each gene: The first partition covered codon positions 1 and 2, and the second partition covered codon position 3, for a total of 31,220,478 columns in 40,768 partitions. RAxML (82) v7.3.2 was used to remove columns / partitions that consisted purely of uncalled bases (N), reducing the final super-matrix to 30,185,251 columns in 40,096 partitions.

Phylogenetic inference was carried out using the PALEOMIX pipeline (10); briefly 100 bootstrap pseudo-replicate alignments were generated from the super-matrix, and parsimony starting trees were generated using RAxML for both the original super-matrix and the bootstrap super-matrices. Phylogenetic inference was carried out for each super-matrix using ExaML v1.0.2 (<http://sco.h-its.org/exelixis/software.html>) under the "GAMMA" model of nucleotide substitutions (Supplementary Figure S18), and the starting trees generated above. The resulting phylogenetic trees were rooted on the midpoint.

| Sample                  | Max | Sample                  | Max |
|-------------------------|-----|-------------------------|-----|
| Arabian                 | 39  | Icelandic (unnamed)     | 30  |
| CGG10022                | 72  | Norwegian Fjord         | 23  |
| CGG10023                | 35  | Przewalski's horse      | 30  |
| Domestic donkey (willy) | 28  | Standardbred            | 37  |
| Icelandic (P5782)       | 69  | Thoroughbred (Twilight) | 45  |

### **Supplementary Table S13. Per-sample maximum depths for SNP quality filtering**

*Maximum depth of coverage for quality filtering of SNPs, determined as the  $> 0.995$  quantile of the per-site depth distribution.*

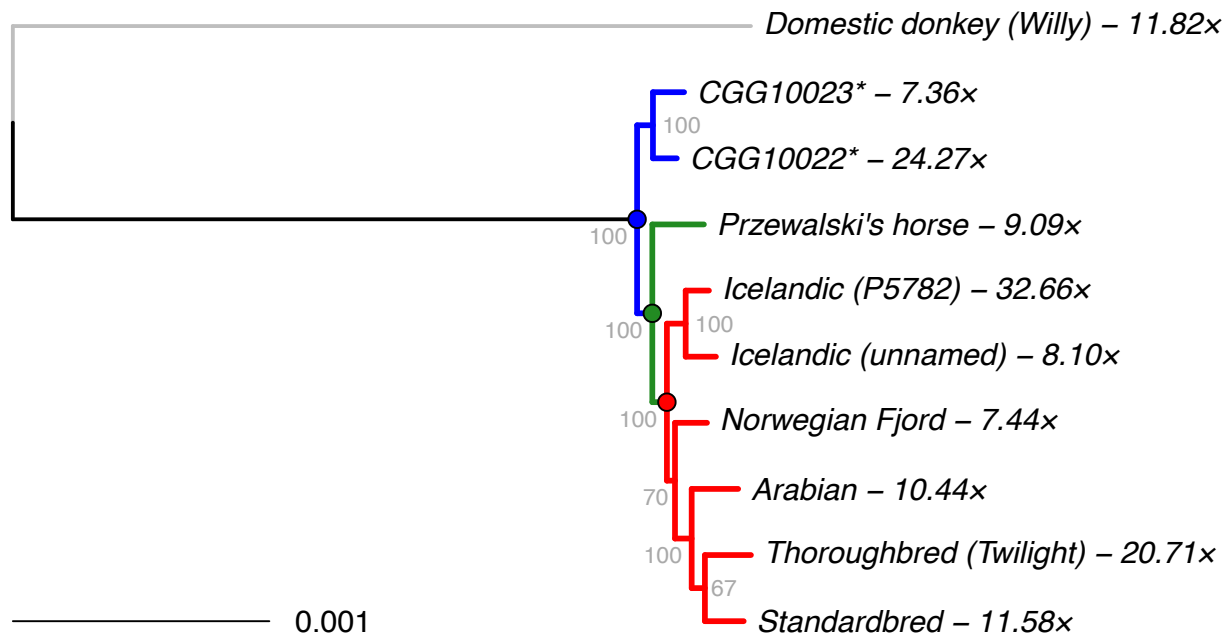

### Supplementary Figure S18. Phylogenetic tree of domesticated and wild horses

Pre-domesticated horses are marked in blue, modern, wild horses are marked in green, and domesticated horses are marked in red respectively; node labels show bootstrap support calculated using 100 bootstrap trees. Average depth-of-coverage relative to the EquCab2.0 reference genome is listed after the sample name. Samples marked with a star were generated for this study (see section S1.1).

## S2.6 Dating of the most recent common ancestors

TMRCAs were estimated for the bootstrap trees generated during phylogenetic inference (see section S2.5) using r8s (83), and using the LF method (molecular clock, maximum likelihood) and the NPRS method (relaxed molecular clock; Non-Parametric Rate Smoothing), both using the POWELL algorithm. In addition the following parameters were set:

- A random seed for each run
- $ftol = 10^{-9}$
- $num\_time\_guesses = 10$
- $num\_restarts = 10$
- $maxiter = 2000$

The date of the root node was constrained to 4.0-4.5 Mya following Orlando *et al.* 2013 (1), and the dates of CGG10022 and CGG10023 were fixed at 43 kyr and 16.5 kyr BP respectively, representing the midpoint of the calibrated radiocarbon dates (see Supplementary Section S1.1). To account for differing topologies in the bootstrap trees, the dating of the smallest clade forming a superset of a clade to be dated was determined for each bootstrap tree, and the median and CI determined based on these dates for both the molecular clock (Supplementary Figure S19 and Supplementary Table S14) and the relaxed clock (Supplementary Figure S20 and Supplementary Table S15).



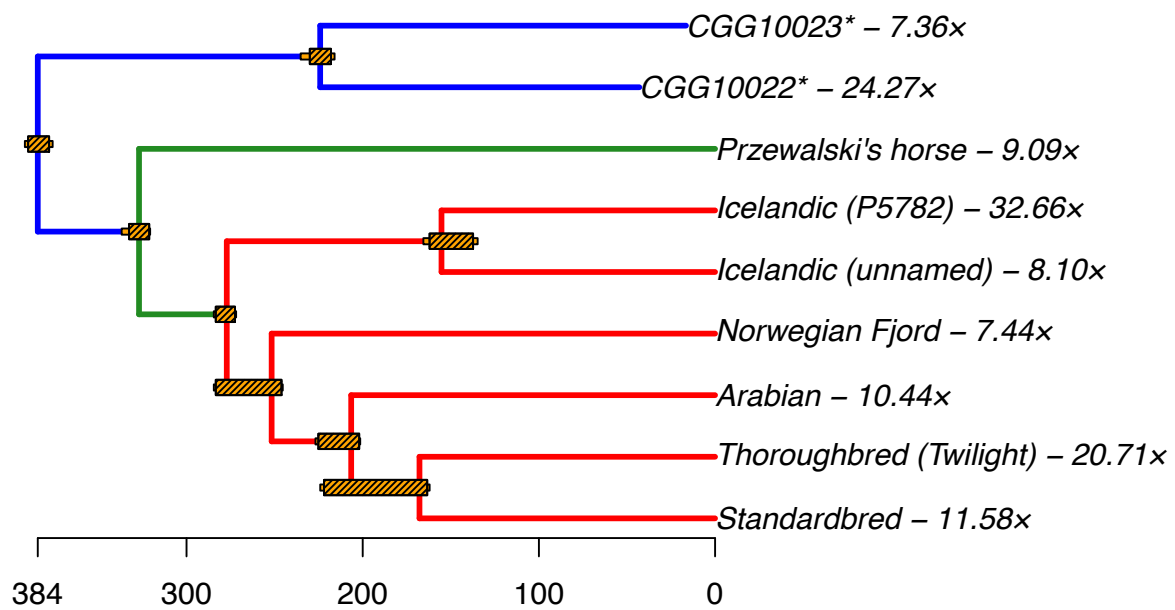

**Supplementary Figure S19. Chronogram of wild and domesticated horses**

Chronogram using the median ages estimated using *r8s* (Supplementary Section S2.6) under a molecular clock. Ages are shown in thousands of years. Pre-domesticated horses are marked in blue, modern, wild horses are marked in green, and modern, domesticated horses are marked in red respectively. Average depth-of-coverage relative to the EquCab2.0 reference genome is listed after the sample name. Samples marked with a star were generated for this study (see section S1.1). The dashed, orange bars indicate the 95% quantiles of the date estimates. The thin, orange bars indicate the minimum and maximum estimates.

|                                                                     | Min     | Q(0.025) | Median  | Q(0.975) | Max     |
|---------------------------------------------------------------------|---------|----------|---------|----------|---------|
| Root                                                                | 4000.38 | 4000.4   | 4000.53 | 4000.56  | 4000.56 |
| Horses                                                              | 375.99  | 377.98   | 384.44  | 389.91   | 391.76  |
| Modern horses                                                       | 320.66  | 321.18   | 326.97  | 332.62   | 336.83  |
| Domestic horses                                                     | 271.86  | 272.48   | 277.17  | 283.41   | 284.51  |
| Arabian, Norwegian Fjord, Standardbred, and Thoroughbred (Twilight) | 245.39  | 246.10   | 251.69  | 283.41   | 284.51  |
| Arabian, Standardbred, and Thoroughbred (Twilight)                  | 201.42  | 202.00   | 206.54  | 225.18   | 226.81  |
| CGG10022 and CGG10023                                               | 215.97  | 218.01   | 224.15  | 230.04   | 235.23  |
| Icelandic (P5782) and Icelandic (unnamed)                           | 134.77  | 137.35   | 155.30  | 162.05   | 165.58  |
| Standardbred and Thoroughbred (Twilight)                            | 162.03  | 163.39   | 167.79  | 221.99   | 224.12  |

**Supplementary Table S14. Times (kyr) to the most recent common ancestors**

Divergence times were estimated using '*r8s*' in thousands of years, under the assumption of a molecular clock, based on 100 bootstrap phylogenies generated from the CDS supermatrix (Supplementary Section S2.5). See Supplementary Figure S19 for the list of domesticated and modern horses.

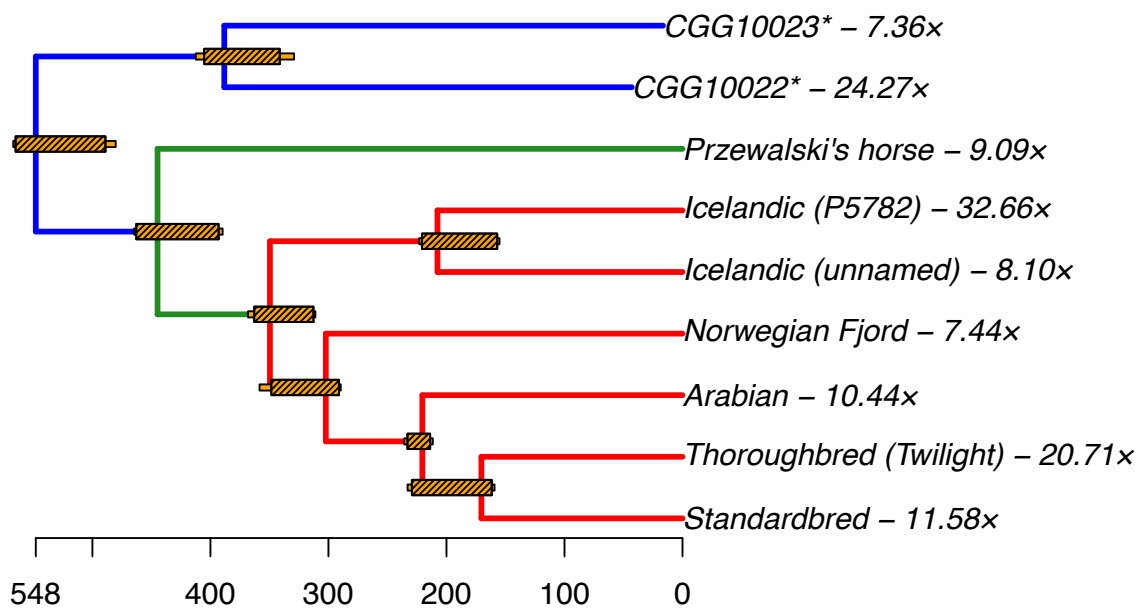

**Supplementary Figure S20. Relaxed chronogram of wild and domesticated horses**

Chronogram using the median ages estimated using *r8s* (Supplementary Section S2.6) under a molecular clock. Ages are shown in thousands of years. Pre-domesticated horses are marked in blue, modern, wild horses are marked in green, and modern, domesticated horses are marked in red respectively. Average depth-of-coverage relative to the EquCab2.0 reference genome is listed after the sample name. Samples marked with a star were generated for this study (see section S1.1). The dashed, orange bars indicate the 95% quantiles of the date estimates. The thin, orange bars indicate the full range of estimates.

|                                                                     | Min     | Q(0.025) | Median  | Q(0.975) | Max     |
|---------------------------------------------------------------------|---------|----------|---------|----------|---------|
| Root                                                                | 4499.81 | 4499.81  | 4499.85 | 4499.91  | 4499.92 |
| Horses                                                              | 480.25  | 488.95   | 547.99  | 565.11   | 567.09  |
| Modern horses                                                       | 389.65  | 393.07   | 444.81  | 462.82   | 464.69  |
| Domestic horses                                                     | 311.08  | 312.70   | 349.58  | 362.89   | 368.15  |
| Arabian, Norwegian Fjord, Standardbred, and Thoroughbred (Twilight) | 289.57  | 291.11   | 302.24  | 348.41   | 358.39  |
| Arabian, Standardbred, and Thoroughbred (Twilight)                  | 211.60  | 213.81   | 220.44  | 233.05   | 235.78  |
| CGG10022 and CGG10023                                               | 329.16  | 341.29   | 388.26  | 405.31   | 412.43  |
| Icelandic (P5782) and Icelandic (unnamed)                           | 155.08  | 156.99   | 207.62  | 220.79   | 223.05  |
| Standardbred and Thoroughbred (Twilight)                            | 159.29  | 161.63   | 170.40  | 229.32   | 232.97  |

**Supplementary Table S15. Times (kyr) to the most recent common ancestors (relaxed clock)**

Ages of population splits estimated using '*r8s*' in thousands of years, under the assumption of a relaxed molecular clock (NPRS), based on 100 bootstrap phylogenies generated from the CDS supermatrix (Supplementary Section S2.5). See Supplementary Figure S20 for the list of domesticated and modern horses.

## S2.7 Gene flow between pre-domesticated and modern horses

### S2.7.1 Background

The ABBA-BABA test was used to examine the presence of gene flow between the pre-domesticated horses (CGG10022 and CGG10023), and the modern horse breeds, using the domestic donkey (Willy) as outgroup. The methodology and theory behind the ABBA-BABA test was originally described by Green *et al.* 2010 (24) and Durand *et al.* 2011 (84). The implementation used here is described in Orlando *et al.* 2013 [see their Supplementary materials S12.1] (1). The Thoroughbred (Twilight) was excluded from the ABBA-BABA test, as the horse reference genome (EquCab2.0) was based on this individual, and remapping of reads from this individual is expected to introduce systematic bias into the test (i.e. this individual is significantly closer to the reference than any other horse).

To briefly summarize Orlando *et al.* 2013, given taxa H1, H2, and H3, and an outgroup, the ABBA-BABA test examines if the topology (((H1, H2), H3), outgroup) is correct, and whether or not there has been gene flow between H3 and H1 on one hand, or between H3 and H2 on the other hand. To accomplish this, bi-allelic loci in which the outgroup carries the (ancestral) allele A, and in which H3 carries the (derived) allele B, and where H1 and H2 carries different alleles (A or B) are tabulated. This yields two possible combinations of alleles: (((A, B), B), A) and (((B, A), B), A). Given the null hypothesis that the topology is correct, and there has been no gene flow between H3 and H1, or between H3 and H2, the two patterns result from incomplete lineage sorting, and are thus equally likely to occur. If however, the topology is incorrect, or if gene flow has occurred between H3 and either H1 or H2, one or the other pattern is expected to dominate.

This is tested using the statistic developed by Green *et al.* 2010 (24), where  $D = (n_{ABBA} - n_{BABA}) / (n_{ABBA} + n_{BABA})$ . If the null hypothesis is correct, this value should be close to zero, while a negative value suggests that H3 is closer to H1 than H2, and a positive value suggests that H3 is closer to H2 than H1. The standard error was estimated using "*delete-m Jackknife for unequal m*" based on 10 Mbp blocks (85). The blocks size was chosen to accommodate the large amount of linkage disequilibrium in horses. The Z-score is given as a measure of significance; absolute values greater than 3 indicate a statistically significant deviation from the null hypothesis.

### S2.7.2 Results

To examine the presence of gene flow between the ancient samples and the domestic horses, each pairwise combination of the modern domestic horses were used for H1 and H2, and tested with either CGG10022 or CGG10023 as H3, and using the Domestic donkey (Willy) as the outgroup. The results are tabulated in Supplementary Table S16. None of the tests performed were found to be significant, consistent with a lack of gene flow between the pre-domesticated horses and any particular domesticated breed.

To examine the presence of gene flow between the ancient samples, and the modern breeds (including Przewalski's horse), each combination of a domestic horse, and Przewalski's horse as H1 and H2, with either CGG10022 or CGG10023 as H3, and the domestic donkey (Willy) as the outgroup was tested. The results are tabulated in Supplementary Table S17, all of which indicates a small but statistically significant ( $D = 0.03$ ; Z-score > 5.4) violation of the topology (((Przewalski's horse, domestic horse), pre-domestic), outgroup).

In addition, we examined each quartet involving domestic horses as H1 and H2, the Przewalski's horse as H3, and the domestic donkey as the outgroup, in order detect the presence gene flow between the Przewalski's horse and the domesticated horses. All quartets were non-significant,

except for quartets involving the Icelandic (P5782) horse. This individual, however, was generated using a different methodology from that of the remaining samples (Supplementary Section S1.1). Therefore, this outcome likely reflects the sensitivity of D-statistic to the sequencing procedure used while generating this genome (2).

| H1    | H2    | H3       | Delta | Total  | D    | D <sub>Jackknife</sub> | D <sub>Sd</sub> | Z-score |
|-------|-------|----------|-------|--------|------|------------------------|-----------------|---------|
| ARA   | FJORD | CGG10022 | 504   | 780476 | 0.00 | 0.00                   | 0.004           | 0.1     |
| ARA   | ICE   | CGG10022 | -1976 | 751664 | 0.00 | 0.00                   | 0.004           | -0.6    |
| FJORD | ICE   | CGG10022 | -2055 | 745203 | 0.00 | 0.00                   | 0.004           | -0.7    |
| ARA   | P5782 | CGG10022 | -2023 | 817857 | 0.00 | 0.00                   | 0.004           | -0.6    |
| FJORD | P5782 | CGG10022 | -2306 | 801968 | 0.00 | 0.00                   | 0.004           | -0.7    |
| ICE   | P5782 | CGG10022 | 569   | 724327 | 0.00 | 0.00                   | 0.004           | 0.2     |
| STA   | P5782 | CGG10022 | 1219  | 836645 | 0.00 | 0.00                   | 0.004           | 0.3     |
| ARA   | STA   | CGG10022 | -3008 | 749934 | 0.00 | 0.00                   | 0.004           | -0.9    |
| FJORD | STA   | CGG10022 | -3370 | 792782 | 0.00 | 0.00                   | 0.004           | -1.0    |
| ICE   | STA   | CGG10022 | -966  | 771734 | 0.00 | 0.00                   | 0.004           | -0.3    |
| ARA   | FJORD | CGG10023 | -952  | 716326 | 0.00 | 0.00                   | 0.004           | -0.3    |
| ARA   | ICE   | CGG10023 | 3145  | 688797 | 0.00 | 0.00                   | 0.004           | 1.0     |
| FJORD | ICE   | CGG10023 | 4283  | 683197 | 0.01 | 0.01                   | 0.004           | 1.7     |
| ARA   | P5782 | CGG10023 | 883   | 745339 | 0.00 | 0.00                   | 0.004           | 0.3     |
| FJORD | P5782 | CGG10023 | 2026  | 730792 | 0.00 | 0.00                   | 0.004           | 0.8     |
| ICE   | P5782 | CGG10023 | -2090 | 657014 | 0.00 | 0.00                   | 0.004           | -0.7    |
| STA   | P5782 | CGG10023 | -742  | 761586 | 0.00 | 0.00                   | 0.004           | -0.2    |
| ARA   | STA   | CGG10023 | 1879  | 686335 | 0.00 | 0.00                   | 0.004           | 0.7     |
| FJORD | STA   | CGG10023 | 2925  | 726749 | 0.00 | 0.00                   | 0.004           | 1.1     |
| ICE   | STA   | CGG10023 | -1635 | 705431 | 0.00 | 0.00                   | 0.004           | -0.6    |

**Supplementary Table S16. ABBA-BABA tests between domestic and pre-domesticated horses**

Delta is  $nABBA - nBABA$ ; total is  $nABBA + nBABA$ ; D is the statistic described in section S2.7;  $D_{Jackknife}$  and  $D_{Sd}$  is the jackknife estimate of D and the associated standard-deviation; Z-scores are significant for values below -3 and values greater than 3; no result is statistically significant. Arabian is abbreviated as ARA, Icelandic (unnamed) as ICE, Icelandic (P5782) as P5782, Norwegian Fjord as FJORD, and Standardbred as STA. The domestic donkey (Willy) is used as the outgroup.

| H1  | H2    | H3       | Delta | Total  | D    | D <sub>Jackknife</sub> | D <sub>Sd</sub> | Z-score |
|-----|-------|----------|-------|--------|------|------------------------|-----------------|---------|
| PRZ | P5782 | CGG10022 | 27429 | 896257 | 0.03 | 0.03                   | 0.005           | 6.6     |
| PRZ | ARA   | CGG10022 | 28471 | 855803 | 0.03 | 0.03                   | 0.005           | 6.7     |
| PRZ | FJORD | CGG10022 | 28793 | 844897 | 0.03 | 0.03                   | 0.005           | 6.7     |
| PRZ | ICE   | CGG10022 | 25886 | 826186 | 0.03 | 0.03                   | 0.005           | 6.7     |
| PRZ | STA   | CGG10022 | 25794 | 872694 | 0.03 | 0.03                   | 0.005           | 5.9     |
| PRZ | P5782 | CGG10023 | 22872 | 818208 | 0.03 | 0.03                   | 0.005           | 5.6     |
| PRZ | ARA   | CGG10023 | 21328 | 786418 | 0.03 | 0.03                   | 0.005           | 5.4     |
| PRZ | FJORD | CGG10023 | 20671 | 775691 | 0.03 | 0.03                   | 0.005           | 5.4     |
| PRZ | ICE   | CGG10023 | 24065 | 757525 | 0.03 | 0.03                   | 0.005           | 6.5     |
| PRZ | STA   | CGG10023 | 23385 | 801365 | 0.03 | 0.03                   | 0.005           | 5.7     |

**Supplementary Table S17. ABBA-BABA tests between ancient, domestic and Przewalski's horse**

Delta is  $nABBA - nBABA$ ; total is  $nABBA + nBABA$ ;  $D$  is the statistic described in section S2.7;  $D_{Jackknife}$  and  $D_{Sd}$  is the jackknife estimate of  $D$  and the associated standard-deviation; Z-scores are significant for values below -3 and values greater than 3; all results are statistically significant. Arabian is abbreviated as ARA, Icelandic (unnamed) as ICE, Icelandic (P5782) as P5782, Norwegian Fjord as FJORD, Przewalski's horse as PRZ, and Standardbred as STA. The domestic donkey (Willy) is used as the outgroup.

| H1  | H2    | H3  | Delta  | Total  | D     | $D_{Jackknife}$ | $D_{Sd}$ | Z-score |
|-----|-------|-----|--------|--------|-------|-----------------|----------|---------|
| ARA | FJO   | PRZ | 9611   | 837791 | 0,01  | 0,01            | 0,005    | 2,1     |
| ARA | ICE   | PRZ | 469    | 803937 | 0,00  | 0,00            | 0,005    | 0,1     |
| FJO | ICE   | PRZ | -8358  | 799970 | -0,01 | -0,01           | 0,005    | -2,2    |
| ARA | STD   | PRZ | -284   | 802264 | 0,00  | 0,00            | 0,005    | -0,1    |
| FJO | STD   | PRZ | -10182 | 850770 | -0,01 | -0,01           | 0,005    | -2,2    |
| ICE | STD   | PRZ | -1085  | 826023 | 0,00  | 0,00            | 0,005    | -0,3    |
| ARA | P5782 | PRZ | -10882 | 870620 | -0,01 | -0,01           | 0,005    | -2,5    |
| FJO | P5782 | PRZ | -20913 | 857015 | -0,02 | -0,02           | 0,005    | -5,0    |
| ICE | P5782 | PRZ | -11298 | 770846 | -0,01 | -0,01           | 0,005    | -3,1    |
| STD | P5782 | PRZ | -10962 | 890656 | -0,01 | -0,01           | 0,005    | -2,6    |

**Supplementary Table S18. ABBA-BABA tests between two domestic and Przewalski's horse**

Delta is  $nABBA - nBABA$ ; total is  $nABBA + nBABA$ ;  $D$  is the statistic described in section S2.7;  $D_{Jackknife}$  and  $D_{Sd}$  is the jackknife estimate of  $D$  and the associated standard-deviation; Z-scores are significant for values below -3 and values greater than 3; all results are statistically significant. Arabian is abbreviated as ARA, Icelandic (unnamed) as ICE, Icelandic (P5782) as P5782, Norwegian Fjord as FJORD, Przewalski's horse as PRZ, and Standardbred as STA. The domestic donkey (Willy) is used as the outgroup.

**S2.7.3 Proportion of the genome of domesticated horses deriving from admixture**

We used the  $f_1^{\wedge}$  estimator to calculate the proportion of the genome within domesticated horses that might be derived from admixture with the ancient horse population (24, 84). This procedure is formally described by Cahill and coworkers (86) and estimates the proportion of an admixed genome by the fraction of derived allele sharing compared to that observed in a completely admixed individual. Originally, two individuals  $I_1$  and  $I_2$  from a first species (species<sub>I</sub>) are considered, and two individuals  $M_1$  and  $M_2$  from another species (species<sub>M</sub>). Admixture is detected between  $I_2$  and  $M_2$ . We can calculate the proportion of the  $I_2$  genome that result from admixture with  $M_2$ ,  $f_1^{\wedge}$ , as:

$$f_1^{\wedge} = \frac{ABBA-BABA_{(I1,I2;M2,Outgroup)}}{ABBA-BABA_{(I1,M1;M2,Outgroup)}}$$

where ABBA-BABA represents the numerator of the D-statistic (A=Ancestral allele, B=Derived allele, relative to the outgroup). This fraction provides a minimal boundary for the proportion of the admixed genome to deriving from admixture, which is proportional to the time difference between the admixture and speciation event. Here, we calculated  $f_1^{\wedge}$  estimators for all combinations of two ancient horses (representing  $M_1$  and  $M_2$ ) and pairs of Przewalski's and domesticated horses in our

study (representing  $I_1$  and  $I_2$ , respectively). The admixture event detected in the following quartet (Domesticated, Przewalski; Ancient, Outgroup) has occurred following the population split between Przewalski's horses and the horse population that will later be domesticated. However, with the data presented in this study, we cannot date the admixture event, which can have occurred at any time following divergence from the Przewalski's horse. Using F-statistics (Supplementary Section S2.8.2), we estimated this time to be ~43.0-51.8 kyr ago, which represents ~29.4-44.0% of the divergence between the ancient horse population and the population that led to modern horses (including domesticated and Przewalski's horses; 117.8-146.2 kyr ago, Supplementary Table S20).

Correcting the values observed for the  $f_1^{\wedge}$  estimator therefore provided an upper boundary for the proportion of the genome of modern domesticated horses that results from admixture with the descent of the ancient horses (Supplementary Table S19).

The D-statistic can be biased whenever the genomes considered as  $I_1$ ,  $I_2$  and  $M_1$  show difference in error rates (1, 87). In such cases, errors taking place at AABA sites introduce spurious ABBA or BABA sites, that influence the D-statistic calculation, hence, the  $f_1^{\wedge}$  estimator. The genome of the ancient horse CGG10023 shows higher error rates than that of CGG10022 (Supplemental Section S1.4). Therefore, quartets where  $M_1$  and  $M_2$  are CGG10023 and CGG10022, respectively, are more subject to errors than quartets where  $M_1$  and  $M_2$  are CGG10022 and CGG10023. We therefore consider all calculations resulting from the later quartets more reliable.

| Quartet Numerator                              | Quartet Denominator                          | All substitutions                |                                                | Transversions only               |                                                |
|------------------------------------------------|----------------------------------------------|----------------------------------|------------------------------------------------|----------------------------------|------------------------------------------------|
|                                                |                                              | Min. boundary ( $f_1^{\wedge}$ ) | Max. boundary ( $f_1^{\wedge}$ time corrected) | Min. boundary ( $f_1^{\wedge}$ ) | Max. boundary ( $f_1^{\wedge}$ time corrected) |
| (Arabian, Przewalski; CGG10022, Outgroup)      | (Arabian, CGG10023; CGG10022, Outgroup)      | 22.9%                            | 52.1-77.9%                                     | 20.0%                            | 45.5-68.0%                                     |
| (Fjord, Przewalski; CGG10022, Outgroup)        | (Fjord, CGG10023; CGG10022, Outgroup)        | 23.3%                            | 52.9-79.2%                                     | 19.9%                            | 45.3-67.7%                                     |
| (Icelandic, Przewalski; CGG10022, Outgroup)    | (Icelandic, CGG10023; CGG10022, Outgroup)    | 21.3%                            | 48.4-72.5%                                     | 21.4%                            | 48.6-72.8%                                     |
| (Standardbred, Przewalski; CGG10022, Outgroup) | (Standardbred, CGG10023; CGG10022, Outgroup) | 19.8%                            | 45.0-67.4%                                     | 20.0%                            | 45.4-68.0%                                     |
| (P5782, Przewalski; CGG10022, Outgroup)        | (P5782, CGG10023; CGG10022, Outgroup)        | 21.0%                            | 47.6-71.3%                                     | 15.7%                            | 35.8-53.5%                                     |
| (Arabian, Przewalski; CGG10023, Outgroup)      | (Arabian, CGG10022; CGG10023, Outgroup)      | 14.8%                            | 33.7-50.4%                                     | 14.0%                            | 31.9-47.8%                                     |
| (Fjord, Przewalski; CGG10023, Outgroup)        | (Fjord, CGG10022; CGG10023, Outgroup)        | 14.4%                            | 32.6-48.9%                                     | 13.7%                            | 31.1-46.5%                                     |
| (Icelandic, Przewalski; CGG10023, Outgroup)    | (Icelandic, CGG10022; CGG10023, Outgroup)    | 17.8%                            | 40.5-60.7%                                     | 17.3%                            | 39.4-59.0%                                     |
| (Standardbred, Przewalski; CGG10023, Outgroup) | (Standardbred, CGG10022; CGG10023, Outgroup) | 16.1%                            | 36.5-54.7%                                     | 17.3%                            | 39.2-58.7%                                     |
| (P5782, Przewalski; CGG10023, Outgroup)        | (P5782, CGG10022; CGG10023, Outgroup)        | 15.3%                            | 34.8-52.1%                                     | 12.9%                            | 29.4-44.0%                                     |

**Supplementary Table S19. Proportion of the genomes of domesticated horses resulting from admixture.**

## S2.8 Population tree and split times

### S2.8.1 Population Tree using TreeMix

We merged the species-specific VCF files for ancient specimens, all domesticated horses, the Przewalski's horse and the donkey outgroup (including non-variants) with 'bcftools' (15), strictly restricting to sites passing quality filters and with biallelic SNPs (Supplemental Section S2.5). Subsequently, the merged VCF file was converted into PLINK format using 'vcftools' (88), which

resulted in final SNP matrices of 4,207,193 SNPs (with donkey) or 2,686,345 SNPs (without the domestic donkey).

Two sets of TreeMix analyses (89) were performed in parallel, depending on whether the domestic donkey was included as outgroup or not. The PLINK SNP matrix was converted to TreeMix-format using the supplied python script ('plink2treemix.py'). In a first series of analyses, each sample was considered individually. In a second set of analyses, we grouped breeds according to their known historical affinities, namely considering the Arabian, the Standardbred and Thoroughbred (Twilight) in a first group (non-Nordic) and the Icelandic (unnamed), Icelandic (P5782) and the Norwegian Fjord in a second group (Nordic). For each analysis, we ran TreeMix considering up to one migration edge (-m 0-1), global perturbation of populations (-global) and 5,000 SNPs per block (-k 5000). Finally, the TreeMix output was plotted with the TreeMix R functions resulting in Supplementary Figure S21 to Supplementary Figure S23.

Using the individuals as distinct populations, the population tree obtained has the same topology as the phylogenetic tree of the samples (Supplementary Figure S22). The first migration edge for the analysis based on the grouped individuals was between the non-Nordic breeds and one of the ancient individuals (Supplementary Figure S23), we noticed that the gene flow direction was likely poorly inferred, as gene flow was inferred from modern domesticated horses into the ancient specimens, despite 16.5-43 kyr of time difference. However, incorrect inference of the directionality of gene flow represents one of the major types of errors for TreeMix (89), as also indicated by our admixture tests based on  $f_3$  statistics (Supplementary Section S2.8.2).

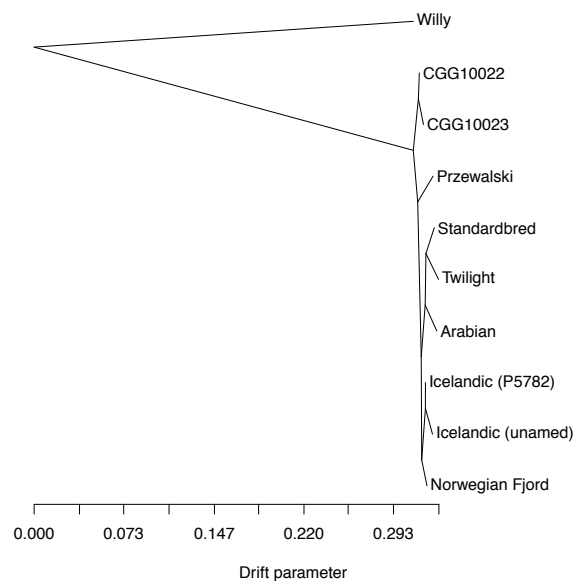

**Supplementary Figure S21. TreeMix population tree with no migration edges, considering each individual as a separate population.**

*99.99959% of the variation is explained by the tree.*

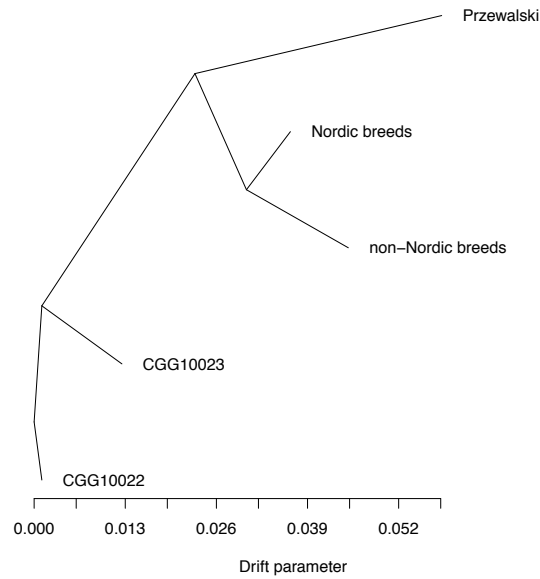

**Supplementary Figure S22.** TreeMix population tree with no migration edges, by using the Nordic (Icelandic (unnamed), Icelandic (P5782) and the Norwegian Fjord) and non-Nordic (Arabian, the Standardbred and Twilight) grouping for the domestic breeds.

99.99938% of the variation is explained by the tree.

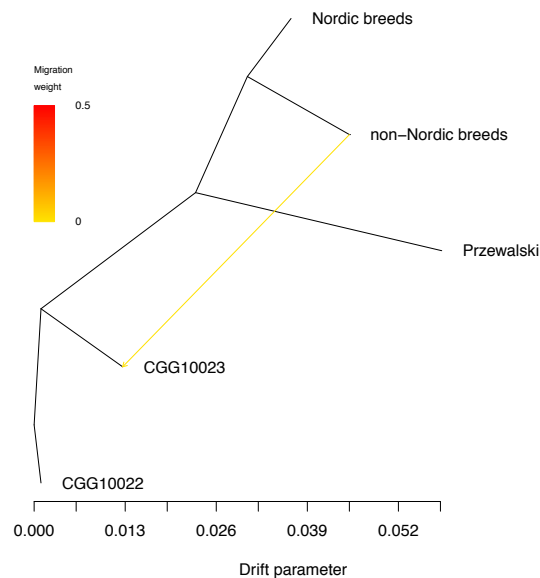

**Supplementary Figure S23.** TreeMix population tree with 1 migration edge, by using the Nordic (Icelandic (unnamed), Icelandic (P5782) and the Norwegian Fjord) and non-Nordic (Arabian, the Standardbred and Twilight) grouping for the domestic breeds.

99.99990% of the variation is explained by the graph.



### S2.8.2 Population split times

We estimated a minimal boundary for the date of divergence between horse populations using the F-statistics, originally introduced by Green and colleagues (24). Here, this statistics is calculated using 3-ways alignments, including one outgroup (the donkey) and two horses (hereafter referred to as Horse<sub>1</sub> and Horse<sub>2</sub>), originating from two different populations. At sites where Horse<sub>2</sub> shows heterozygosity, we random-sampled one base from the sequence data underlying the Horse<sub>1</sub> genome and counted how often the derived allele (i.e. different to that present in the Outgroup genome) was found. This frequency represents the F-statistics, which has been described to decrease with increasing population split times between Horse<sub>1</sub> and Horse<sub>2</sub>.

In order to avoid alignment biases toward the horse reference, trio pileups were built using BAM files aligned to the *de novo* donkey assembly (Orlando et al. 2013). The command '*mpileup*' from the SAMtools suite (15) was used with the options -EA as described in Orlando et al. 2013 (Supplementary section 5.2.a). The following filters were then applied to the sites and discarded:

- scaffolds predicted to be from the X or Y chromosomes by Orlando et al. 2013
- bases with a quality < Phred score 30
- Depth-of-coverage for Outgroup and Horse<sub>2</sub> < 8
- tri-allelic sites
- indels present in any of individual in the trio
- variants, homozygous derived or heterozygous for the Outgroup to itself

Finally, scaffolds with a minimal size of 10 kb and with at least 5 kb covered sites were retained. Coalescent simulations under a simple model consisting of two populations splitting at a given time T were then performed across a uniform grid of possible value for T (every 2,500 years; Supplementary Table S20), and Approximate Bayesian Computation was used to recover a posterior distribution for T (Supplementary Figure S24), following the methodology presented by Orlando and colleagues (1) and using the '*abc*' R package (90) with loclinear regression method and a tolerance value of 2.5%. This procedure is known to be sensitive to the demographic model used for simulations of the Horse<sub>2</sub> population, but is robust to that considered for the Horse<sub>1</sub> population (1, 24). We therefore used a simplified demographic model deriving from PSMC inference (Supplemental Section S2.10) for time periods older than 10,000 years. As PSMC inference is known to be unreliable for younger times, we relied on the recent demographic expansion described by Lippold and coworkers (35) and Achilli and coworkers (91) based on the variation present in mitochondrial genomes. We averaged the population size estimated in both studies. Details about the demographic model are presented in Supplementary Figure S24. We performed a total number of 100 simulations per population time split using *fastsimcoal2* (92) and independent genomic blocks of at least 5 kb. These blocks corresponded to all *de novo* genomic contigs available for the donkey outgroup and where sequence information was available for both Horse<sub>1</sub> and Horse<sub>2</sub> genomes. We used a generation time of 8 years and a global mutation rate of  $7.242 \times 10^{-9}$  mutation per site per generation for all mutation types and  $2.108 \times 10^{-9}$  mutation per site per generation for transversions (1).

Of note, coalescent simulations were performed without gene flow post-population split. Yet, following gene flow, derived mutations specific to any of the two horse populations will be shared with the other population, resulting in an increase of the F-statistics and longer time periods would be needed before the value for the F-statistics observed between Horse<sub>1</sub> and Horse<sub>2</sub> could be reached. D-statistics calculation and prior work (1) show that assumption of isolation is valid when considering populations of domesticated and Przewalski's horses. However, admixture tests (SI section S2.7) have revealed the presence of significant gene flow between the population of our ancient horses (and their descent) and the population of domesticated horses. Therefore, the

methodology used only provides a minimal boundary for the age of population split between ancient and modern horses.

In order to determine how our estimates for the time of this population split are affected by increasing amounts of gene flow, we performed the same simulations as those described above but assuming three possible migration rates (Supplementary Table S21). Migrations were assumed to go from the population including the ancient horses into the population leading to modern domesticated horses. The range selected spanned three orders of magnitudes ( $10^{-4}$ ,  $10^{-5}$  and  $10^{-6}$  migrants per generation) and comprised migration rate estimates recovered from  $\partial\text{adi}$  (SI section S2.9). In our simulations, such migration rates correspond to 1 migrant per generation, or 1 migrant per 10 or 100 generations. Migrations were allowed between 40 kya and 4 kya, following our findings that the gene flow could have occurred at any time after the split between Przewalski's horses and domesticated horses, and until the early stages of domestication. We then performed ABC (tolerance = 0.025) to recover posterior distributions of population time splits that we compared to those obtained in absence of gene flow (Supplementary Figure S25). We observed only a marginal effect on the population split time between ancient and modern horses from increasing levels of gene flow, except when migration rates were superior to 1 migrant per generation to 1 migrant per generation. These analyses were performed on the two following trios (Outgroup,(CGG10023, Icelandic)) and (Outgroup,(CGG10023,Twilight)).

In order to test the migration edge inferred between the CGG10023 and the non-Nordic breeds by TreeMix (Supplementary Section S2.8.1), we calculated  $f_3$ -statistics (93) using the 'threepop' program (-k 5000) provided in the TreeMix package. Here we use the same notation as Patterson et al. (93), that is, if  $f_3(C;A,B)$  is negative then it suggests that population C has contribution from both ancestral populations of A and B. The resulting  $f_3$ -statistics are in Supplementary Table S22 to Supplementary Table S24. Given that the addition of the migration edge explains a minute proportion of the residual variance (0.00052%; compare Supplementary Figure S22 and Supplementary Figure S23) and the  $f_3(\text{CGG10023}; \text{CGG10022}, \text{non-Nordic horses})$  statistics is positive ( $f_3 = 0.0114$ ; Supplementary Table Supplementary Table S22), we conclude that this inferred migration edge is probably of spurious nature.

We further tested the migration edge inferred by TreeMix by attempting to detect the presence of gene flow between CGG10023 and the modern horses using D-statistics (Supplementary Table S25), and found no support for admixture in all but one test, namely between CGG10023 and the Arabian horse. This is in contrast with the migration edge inferred by TreeMix (from non-Nordic breeds into CGG10023) and hence we do not consider this as supporting the migration edge inferred by TreeMix. We further tested for the possibility of gene flow from the modern breeds into the ancient populations using  $f_3$  (Supplementary Table S26) but, as all tests yielded positive  $f_3$  values, we did not find support for such gene flow in any of the tests.

| 3-way (Outgroup,(Horse <sub>1</sub> ,Horse <sub>2</sub> )) | Mutation | #Blocks | #Length (bp)  | T <sub>min</sub><br>(KY) | T <sub>max</sub><br>(KY) | Posterior Time (T, KY) |       |       |
|------------------------------------------------------------|----------|---------|---------------|--------------------------|--------------------------|------------------------|-------|-------|
|                                                            |          |         |               |                          |                          | 2.5%                   | mode  | 97.5% |
| (Outgroup, (CGG10022, Twilight))*                          | tv       | 32,083  | 1,596,551,988 | 47.5                     | 450                      | 125.8                  | 154.6 | 192.9 |
|                                                            | all      | 32,083  | 1,596,551,988 | 47.5                     | 450                      | 80.7                   | 117.9 | 145.4 |
| (Outgroup, (CGG10023, Twilight))*                          | tv       | 31,608  | 1,553,167,427 | 20                       | 450                      | 135.3                  | 159.2 | 211.4 |
|                                                            | all      | 31,608  | 1,553,167,427 | 20                       | 450                      | 103.1                  | 126.3 | 153.1 |
| (Outgroup, (CGG10022, Icelandic))*                         | tv       | 24,663  | 751,879,578   | 47.5                     | 450                      | 89.3                   | 127.4 | 155.9 |
|                                                            | all      | 24,663  | 751,879,578   | 47.5                     | 450                      | 57.2                   | 76.3  | 115.4 |
| (Outgroup, (CGG10023, Icelandic))*                         | tv       | 24,444  | 736,932,893   | 20                       | 450                      | 118.7                  | 138.0 | 173.6 |
|                                                            | all      | 24,444  | 736,932,893   | 20                       | 450                      | 68.9                   | 107.1 | 128.7 |
| (Outgroup, (Twilight, Icelandic))                          | tv       | 24,808  | 758,019,473   | 2.5                      | 300                      | 35.1                   | 36.5  | 38.2  |
|                                                            | all      | 24,808  | 758,019,473   | 2.5                      | 300                      | 32.8                   | 34.1  | 35.9  |
| (Outgroup, (P5782, Icelandic))                             | tv       | 24,815  | 758,350,065   | 2.5                      | 300                      | 29.0                   | 29.9  | 31.1  |
|                                                            | all      | 24,815  | 758,350,065   | 2.5                      | 300                      | 28.1                   | 29.1  | 36.3  |

|                                     |     |        |               |     |     |      |      |      |
|-------------------------------------|-----|--------|---------------|-----|-----|------|------|------|
| (Outgroup, (Przewalski, Icelandic)) | tv  | 24,729 | 753,877,917   | 2.5 | 300 | 43.8 | 47.1 | 52.0 |
|                                     | all | 24,729 | 753,877,917   | 2.5 | 300 | 40.7 | 43.0 | 46.6 |
| (Outgroup, (Przewalski, Twilight))  | tv  | 32,036 | 1,596,534,893 | 2.5 | 300 | 46.9 | 51.8 | 58.1 |
|                                     | all | 32,036 | 1,596,534,893 | 2.5 | 300 | 42.6 | 46.7 | 70.2 |

**Supplementary Table S20. Population split times with no migration**

$T_{min}$  and  $T_{max}$  represent the time grid used for coalescent simulations, which changed given the difference in age between our ancient and modern samples. The mode, 2.5% and 97.5% quantiles are indicated for each posterior distribution (in thousands of years, KY). (tv): only transversions were considered. (all): all mutation types were considered. \*: lower boundary.

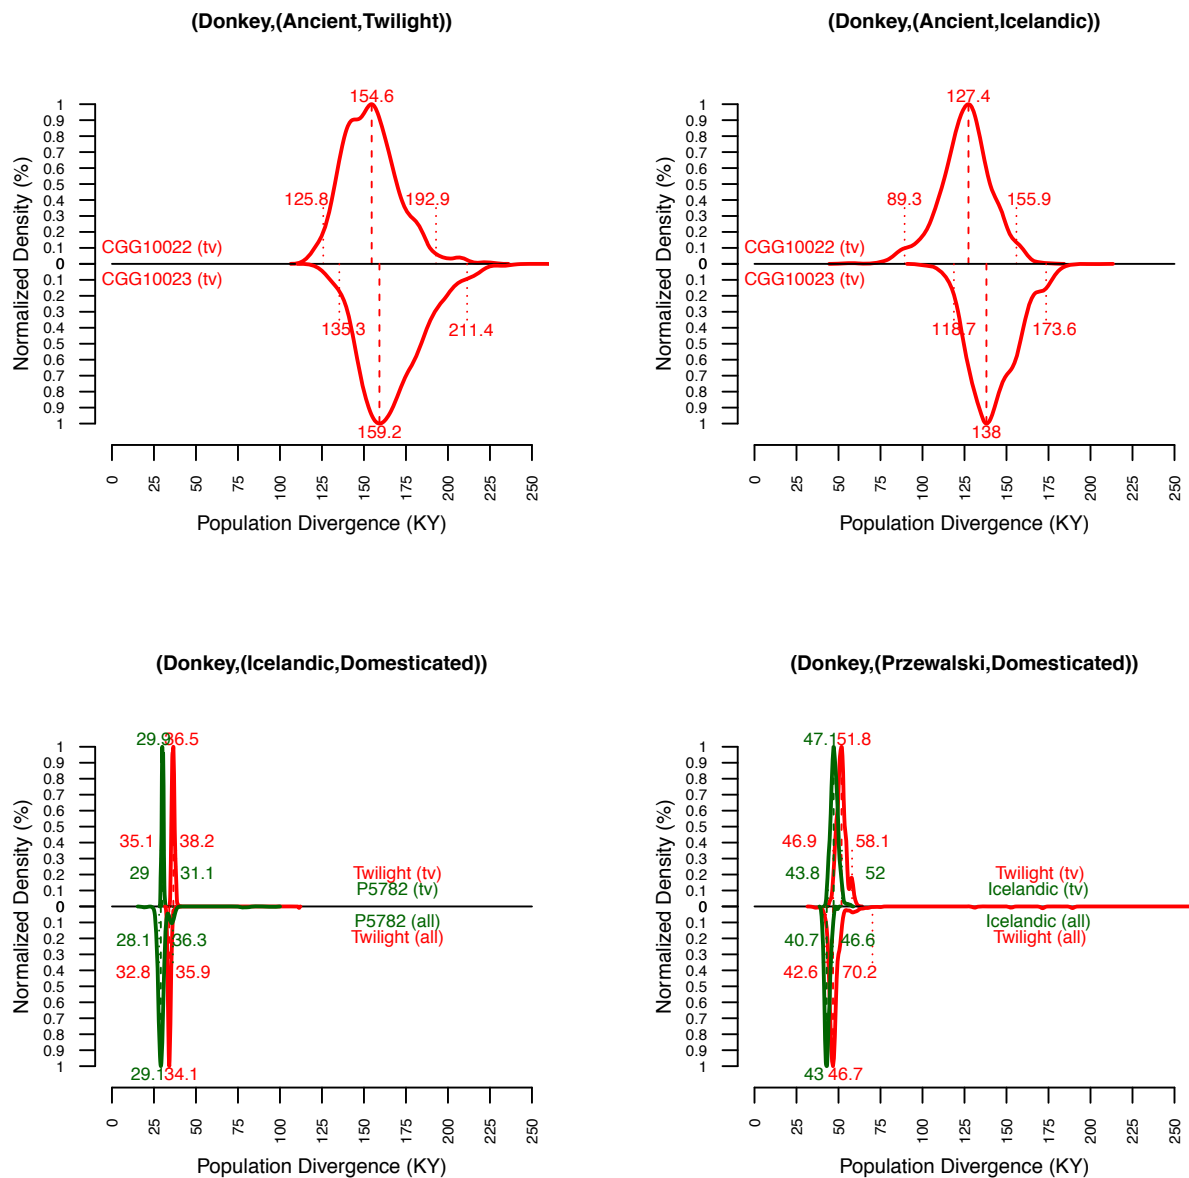

**Supplementary Figure S24. Posterior distributions of population split times.**

The 3-way alignment considered is provided above each graph. The mode, 2.5% and 97.5%

quantiles are indicated for each posterior distribution (in thousands of years, KY). Top Left panel: Population split time between the ancient and modern horse population, using Twilight as Horse<sub>2</sub>. Top Right panel: Population split time between the ancient and modern horse population, using Icelandic as Horse<sub>2</sub>. Bottom Left panel: Population split time between two modern domesticated horses, using either Twilight or Icelandic as Horse<sub>2</sub>. Bottom Right panel: Population split time between the Przewalski's horse population and modern domesticated horses, using either Twilight or Icelandic as Horse<sub>2</sub>. (tv): only tranversions were considered. (all): all mutation types were considered.

| 3-way (Outgroup,(Horse <sub>1</sub> ,Horse <sub>2</sub> )) | Mutation | MigRate          | T <sub>min</sub><br>(KY) | T <sub>max</sub><br>(KY) | Posterior Time (T, KY) |       |        |
|------------------------------------------------------------|----------|------------------|--------------------------|--------------------------|------------------------|-------|--------|
|                                                            |          |                  |                          |                          | 2.5%                   | mode  | 97.5%  |
| (Outgroup, (CGG10023, Twilight))                           | tv       | 10 <sup>-4</sup> | 20                       | 600                      | 369.7                  | 523.0 | 597.7  |
|                                                            | all      | 10 <sup>-4</sup> | 20                       | 600                      | 232.3                  | 340.1 | 583.5  |
|                                                            | tv       | 10 <sup>-5</sup> | 20                       | 450                      | 146.4                  | 179.5 | 233.4  |
|                                                            | all      | 10 <sup>-5</sup> | 20                       | 450                      | 115.0                  | 134.0 | 165.2  |
|                                                            | tv       | 10 <sup>-6</sup> | 20                       | 450                      | 134.3                  | 165.0 | 208.0  |
|                                                            | all      | 10 <sup>-6</sup> | 20                       | 450                      | 106.6                  | 131.0 | 155.1  |
| (Outgroup, (CGG10023, Icelandic))                          | tv       | 10 <sup>-4</sup> | 20                       | 600                      | 277.5                  | 374.4 | 594.3  |
|                                                            | all      | 10 <sup>-4</sup> | 20                       | 600                      | 165.1                  | 208.3 | 336.5  |
|                                                            | tv       | 10 <sup>-5</sup> | 20                       | 450                      | 125.8                  | 149.2 | 184.2  |
|                                                            | all      | 10 <sup>-5</sup> | 20                       | 450                      | 75.2                   | 114.9 | 135.17 |
|                                                            | tv       | 10 <sup>-6</sup> | 20                       | 450                      | 120.3                  | 139.4 | 176.1  |
|                                                            | all      | 10 <sup>-6</sup> | 20                       | 450                      | 67.1                   | 107.9 | 130.6  |

**Supplementary Table S21. Population split times with migration**

T<sub>min</sub> and T<sub>max</sub> represent the time grid used for coalescent simulations. The mode, 2.5% and 97.5% quantiles are indicated for each posterior distribution (in thousands of years, KY). (tv): only tranversions were considered. (all): all mutation types were considered. MigRate = Migration rate (proportion of individuals migrating from the ancient population into the modern population). The number of genomic blocks simulated as well as their total length is indicated in Supplementary Table S20.

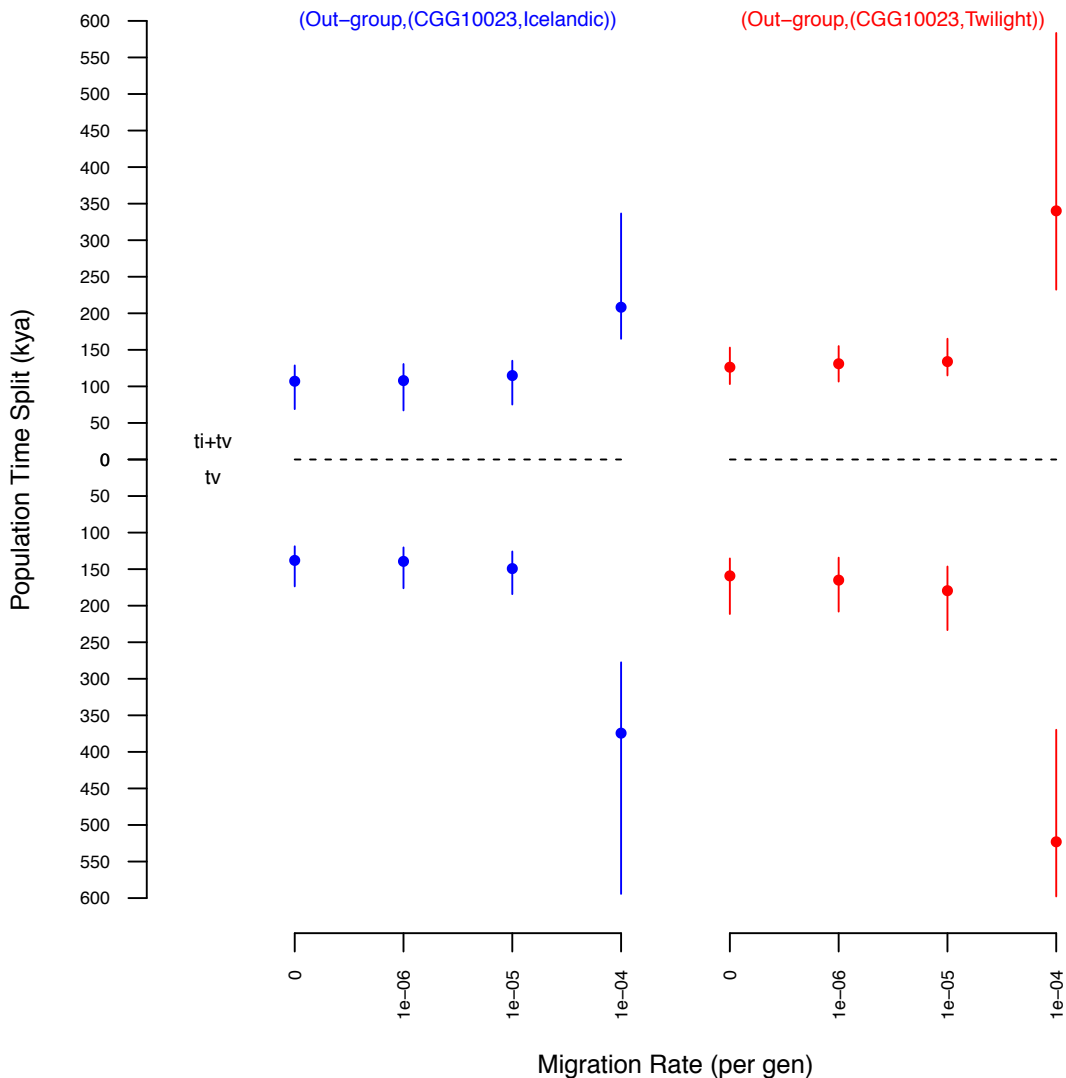

**Supplementary Figure S25. Sensitivity of Population split times to migration rates**

We used the *F*-statistics, serial coalescent simulations and Approximate Bayesian Computation to estimate the population split time between ancient and modern domesticated horses. Simulations were performed assuming no migration, or increasing migration rates (proportion of migrant per generation =  $10^{-6}$ ,  $10^{-5}$  and  $10^{-4}$ ) from the ancient population into the population of modern domesticated horses. Migration rates were considered constant between 40,000 and 4,000 years ago but zero at any other time. *ti+tv* = all mutations were considered. *tv* = transversions only.

| <b>(C=CGG10023; A=CGG10022, B)</b> | <b>f3</b> | <b>std</b> | <b>Z</b> |
|------------------------------------|-----------|------------|----------|
| CGG10023; CGG10022, Nordic         | 0.0115    | 0.000483   | 23.8     |
| CGG10023; CGG10022, non-Nordic     | 0.0114    | 0.000470   | 24.1     |

|                                  |        |          |      |
|----------------------------------|--------|----------|------|
| CGG10023; CGG10022, Icelandic    | 0.0113 | 0.000496 | 22.7 |
| CGG10023; CGG10022, P5782        | 0.0115 | 0.000494 | 23.2 |
| CGG10023; CGG10022, Standardbred | 0.0113 | 0.000510 | 22.1 |
| CGG10023; CGG10022, Arabian      | 0.0115 | 0.000474 | 24.3 |
| CGG10023; CGG10022, Fjord        | 0.0118 | 0.000506 | 23.3 |
| CGG10023; CGG10022, Przewalski   | 0.0115 | 0.000472 | 24.4 |
| CGG10023; CGG10022, Twilight     | 0.0113 | 0.000473 | 23.9 |

**Supplementary Table S22. f-3 statistic for CGG10023; CGG10022, (non-)Nordic horses**

| <b>(C=CGG10023; A, B)</b>          | <b>f3</b> | <b>std</b> | <b>Z</b> |
|------------------------------------|-----------|------------|----------|
| CGG10023; Nordic, non-Nordic       | 0.0407    | 0.000685   | 59.3     |
| CGG10023; Nordic, Przewalski       | 0.0241    | 0.000637   | 37.9     |
| CGG10023; non-Nordic, Przewalski   | 0.0332    | 0.000638   | 52.1     |
| CGG10023; Icelandic, P5782         | 0.0504    | 0.000924   | 54.6     |
| CGG10023; Icelandic, Standardbred  | 0.0407    | 0.000744   | 54.7     |
| CGG10023; Icelandic, Arabian       | 0.0411    | 0.000781   | 52.6     |
| CGG10023; Icelandic, Fjord         | 0.0417    | 0.000710   | 58.8     |
| CGG10023; Icelandic, Przewalski    | 0.0331    | 0.000687   | 48.2     |
| CGG10023; Icelandic, Twilight      | 0.0406    | 0.000753   | 53.9     |
| CGG10023; P5782, Standardbred      | 0.0407    | 0.000784   | 51.9     |
| CGG10023; P5782, Arabian           | 0.0404    | 0.000735   | 55.0     |
| CGG10023; P5782, Fjord             | 0.0420    | 0.000757   | 55.4     |
| CGG10023; P5782, Przewalski        | 0.0331    | 0.000630   | 52.5     |
| CGG10023; P5782, Twilight          | 0.0401    | 0.000752   | 53.3     |
| CGG10023; Standardbred, Arabian    | 0.0480    | 0.000888   | 54.0     |
| CGG10023; Standardbred, Fjord      | 0.0410    | 0.000782   | 52.4     |
| CGG10023; Standardbred, Przewalski | 0.0331    | 0.000656   | 50.5     |
| CGG10023; Standardbred, Twilight   | 0.0512    | 0.001028   | 49.8     |
| CGG10023; Arabian, Fjord           | 0.0405    | 0.000744   | 54.4     |
| CGG10023; Arabian, Przewalski      | 0.0335    | 0.000679   | 49.3     |
| CGG10023; Arabian, Twilight        | 0.0512    | 0.001011   | 50.6     |
| CGG10023; Fjord, Przewalski        | 0.0341    | 0.000686   | 49.8     |
| CGG10023; Fjord, Twilight          | 0.0410    | 0.000704   | 58.3     |
| CGG10023; Przewalski, Twilight     | 0.0332    | 0.000664   | 50.0     |

**Supplementary Table S23. f-3 statistic for CGG10022; modern horse, modern horse**

| <b>(C=CGG10022; A, B)</b>         | <b>f3</b> | <b>std</b> | <b>Z</b> |
|-----------------------------------|-----------|------------|----------|
| CGG10022; Nordic, non-Nordic      | 0.0315    | 0.000683   | 46.1     |
| CGG10022; Nordic, Przewalski      | 0.0241    | 0.000637   | 37.9     |
| CGG10022; non-Nordic, Przewalski  | 0.0241    | 0.000646   | 37.3     |
| CGG10022; Icelandic, P5782        | 0.0414    | 0.000942   | 43.9     |
| CGG10022; Icelandic, Standardbred | 0.0319    | 0.000737   | 43.2     |
| CGG10022; Icelandic, Arabian      | 0.0320    | 0.000809   | 39.6     |
| CGG10022; Icelandic, Fjord        | 0.0324    | 0.000736   | 44.0     |

|                                    |        |          |      |
|------------------------------------|--------|----------|------|
| CGG10022; Icelandic, Przewalski    | 0.0241 | 0.000682 | 35.3 |
| CGG10022; Icelandic, Twilight      | 0.0317 | 0.000745 | 42.6 |
| CGG10022; P5782, Standardbred      | 0.0317 | 0.000768 | 41.2 |
| CGG10022; P5782, Arabian           | 0.0311 | 0.000729 | 42.7 |
| CGG10022; P5782, Fjord             | 0.0324 | 0.000720 | 45.0 |
| CGG10022; P5782, Przewalski        | 0.0238 | 0.000635 | 37.4 |
| CGG10022; P5782, Twilight          | 0.0309 | 0.000723 | 42.8 |
| CGG10022; Standardbred, Arabian    | 0.0389 | 0.000920 | 42.3 |
| CGG10022; Standardbred, Fjord      | 0.0317 | 0.000766 | 41.3 |
| CGG10022; Standardbred, Przewalski | 0.0241 | 0.000654 | 36.8 |
| CGG10022; Standardbred, Twilight   | 0.0423 | 0.001026 | 41.2 |
| CGG10022; Arabian, Fjord           | 0.0309 | 0.000741 | 41.7 |
| CGG10022; Arabian, Przewalski      | 0.0242 | 0.000694 | 34.8 |
| CGG10022; Arabian, Twilight        | 0.0426 | 0.001028 | 40.9 |
| CGG10022; Fjord, Przewalski        | 0.0245 | 0.000679 | 36.2 |
| CGG10022; Fjord, Twilight          | 0.0316 | 0.000712 | 44.4 |
| CGG10022; Przewalski, Twilight     | 0.0241 | 0.000673 | 35.8 |

**Supplementary Table S24. f-3 statistic for CGG10023; modern horse, modern horse**

| <b>(H1, H2; H3, Outgroup)</b>                | <b>D</b> | <b>Std</b> | <b>Z</b> | <b>Jackknife</b> |
|----------------------------------------------|----------|------------|----------|------------------|
| (CGG10022, CGG10023; Arabian, Outgroup)      | -0.0137  | 0.00455    | -3.0     | -0.0137          |
| (CGG10022, CGG10023; Fjord, Outgroup)        | -0.0137  | 0.00473    | -2.9     | -0.0137          |
| (CGG10022, CGG10023; Icelandic, Outgroup)    | -0.0095  | 0.00497    | -1.9     | -0.0095          |
| (CGG10022, CGG10023; P5782, Outgroup)        | -0.0100  | 0.00463    | -2.2     | -0.0100          |
| (CGG10022, CGG10023; Przewalski, Outgroup)   | -0.0069  | 0.00455    | -1.5     | -0.0069          |
| (CGG10022, CGG10023; Standardbred, Outgroup) | -0.0078  | 0.00481    | -1.6     | -0.0079          |

**Supplementary Table S25. ABBA-BABA tests between modern and two ancient horses**

*Delta is nABBA – nBABA; total is nABBA + nBABA; D is the statistic described in section S2.7; Jackknife and Std is the jackknife estimate of D and the associated standard-deviation; Z-scores are significant for values below -3 and values greater than 3. The domestic donkey (Willy) is used as the outgroup.*

| <b>(C; A, B)</b>                  | <b>f3</b> | <b>std</b> | <b>Z</b> |
|-----------------------------------|-----------|------------|----------|
| non-Nordic; Nordic, CGG10022      | 0.0146    | 0.000451   | 32.4     |
| non-Nordic; Nordic, CGG10023      | 0.0145    | 0.000453   | 31.9     |
| non-Nordic;Przewalski,CGG10022    | 0.0220    | 0.000517   | 42.5     |
| non-Nordic;Przewalski,CGG10023    | 0.0219    | 0.000540   | 40.5     |
| Nordic; non-Nordic, Przewalski    | 0.0062    | 0.000313   | 19.8     |
| Standardbred; Icelandic, CGG10022 | 0.0289    | 0.001174   | 24.7     |
| Standardbred; Icelandic, CGG10023 | 0.0290    | 0.001197   | 24.2     |
| Arabian; Icelandic, CGG10022      | 0.0345    | 0.001097   | 31.4     |
| Arabian; Icelandic, CGG10023      | 0.0347    | 0.001140   | 30.5     |
| Twilight; Icelandic, CGG10022     | 0.0393    | 0.001172   | 33.5     |
| Twilight; Icelandic, CGG10023     | 0.0394    | 0.001154   | 34.1     |
| Standardbred; P5782, CGG10022     | 0.0291    | 0.001156   | 25.2     |
| Standardbred; P5782, CGG10023     | 0.0289    | 0.001171   | 24.7     |
| Arabian; P5782, CGG10022          | 0.0354    | 0.001114   | 31.8     |

|                                     |        |          |      |
|-------------------------------------|--------|----------|------|
| Arabian; P5782, CGG10023            | 0.0354 | 0.001130 | 31.4 |
| Twilight; P5782, CGG10022           | 0.0401 | 0.001182 | 33.9 |
| Twilight; P5782, CGG10023           | 0.0399 | 0.001167 | 34.2 |
| Standardbred; Fjord, CGG10022       | 0.0292 | 0.001150 | 25.4 |
| Standardbred; Fjord, CGG10023       | 0.0286 | 0.001166 | 24.6 |
| Arabian; Fjord, CGG10022            | 0.0356 | 0.001109 | 32.1 |
| Arabian; Fjord, CGG10023            | 0.0353 | 0.001123 | 31.5 |
| Twilight; Fjord, CGG10022           | 0.0394 | 0.001152 | 34.2 |
| Twilight; Fjord, CGG10023           | 0.0390 | 0.001120 | 34.8 |
| Standardbred; Przewalski, CGG10022  | 0.0368 | 0.001171 | 31.4 |
| Standardbred; Przewalski, CGG10023  | 0.0365 | 0.001203 | 30.3 |
| Arabian; Przewalski, CGG10022       | 0.0423 | 0.001126 | 37.6 |
| Arabian; Przewalski, CGG10023       | 0.0424 | 0.001188 | 35.7 |
| Twilight; Przewalski, CGG10022      | 0.0470 | 0.001159 | 40.5 |
| Twilight; Przewalski, CGG10023      | 0.0468 | 0.001119 | 41.8 |
| Icelandic; Standardbred, Przewalski | 0.0253 | 0.000842 | 30.0 |
| Icelandic; Arabian, Przewalski      | 0.0253 | 0.000895 | 28.2 |
| Icelandic; Twilight, Przewalski     | 0.0254 | 0.000917 | 27.7 |
| P5782; Arabian, Przewalski          | 0.0093 | 0.000605 | 15.4 |
| P5782; Standardbred, Przewalski     | 0.0086 | 0.000533 | 16.2 |
| P5782; Twilight, Przewalski         | 0.0093 | 0.000589 | 15.9 |
| Fjord; Arabian, Przewalski          | 0.0130 | 0.000854 | 15.2 |
| Fjord; Standardbred, Przewalski     | 0.0122 | 0.000837 | 14.5 |
| Fjord; Twilight, Przewalski         | 0.0122 | 0.000823 | 14.8 |

**Supplementary Table S26. f-3 statistic testing for admixture for (non-)Nordic**

## S2.9 Joint demographic inference using $\partial a \partial i$

We refined the joint demographic history of horses using  $\partial a \partial i$  (version 1.6.3), a program which estimates demographic parameters based on the diffusion approximation to the site frequency spectrum (SFS) (93). We used the 3-dimensions SFS (3D-SFS) using the Domestic horse (DOM), CGG10022 (ANC) and Przewalski's horse (PRZ) samples. We did not include CGG10023 due to its lower sequencing coverage and we did not take into account SNPs leading to transitions, as the latter is more likely to be due to DNA damage in ancient samples. We folded the spectrum to avoid biases when assessing the ancestral allelic states.

We adopted the demographic model used in simulations using *fastsimcoal2* (see Section S2.8). We allowed only instantaneous population size changes, except for the most recent expansion of domesticated horses where we modeled an exponential growth (Supplementary Figure S26).

We ran the program 20 times with varying starting points to ensure convergence, and retained the fitting with the highest likelihood. Gene flow from ANC to DOM/PRZ was modeled as a continuous migration event from the time of the split to the ANC collecting time (43 kya). After the split between DOM and PRZ, the same rate of gene flow was imposed from ANC solely to DOM, as supported by previous analyses (see Supplementary Section S2.7).



We calibrated our estimated model parameters into years and effective population sizes using estimates previously obtained from fastsimcoal2 analyses. We let 4 parameters free to be estimated: the split time between ANC and DOM/PRZ, the migration rate from ANC to DOM/PRZ, the split time between DOM and PRZ, and the current effective population size of ANC and PRZ.

Supplementary Table S27 shows the most likely values of estimated parameters. The resulting population split time at around ~169k year BP support the results obtained from the F-Statistics (Supplementary Section S2.8), and closely matches estimates obtained when assuming a migration rate of  $10^{-5}$ . Observed and modeled spectra are presented in Supplementary Figure S27.

We assessed the statistical significance of the model improvement observed following the addition of migration event using a Likelihood Ratio Test (LRT) with a block re-sampling approach. For this sole purpose, we generated a SFS by randomly sampling one unique single site for each non-overlapping window of 25 kb across the entire genome. This procedure ensured that a sufficiently large number of sites was considered and that the observations were approximately independent.

A model was fitted assuming no migration between ANC and DOM/PRZ and assuming migration from ANC to DOM/PRZ, following the same procedure as above where the fit was computed several times and the best likelihood was recorded. P-value was computed by doubling the difference in log-likelihood between models and assuming a  $\chi^2$  distribution with 1 degree of freedom. To assess the robustness in the resulting p-value, 10 different sampling procedures were used and the highest (and therefore most conservative) value was recorded.

We find statistical support for the model including migration from ANC to DOM/PRZ, with the highest p-value among all 10 replicates being equal to  $3.23 \times 10^{-8}$ .

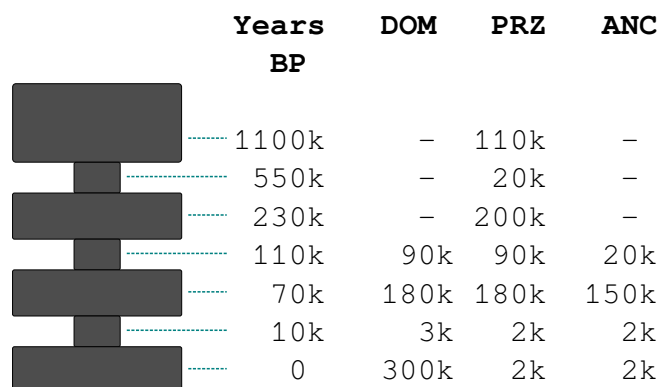

**Supplementary Figure S26. Population models for the  $\Delta a \Delta i$  analysis**

Demographic shifts have been modelled as instantaneous for tractability reasons; for the first three shifts, the population sizes are identical for the three populations, as these have not yet split. Gene flow was allowed between the ANC and DOM/PRZ populations from the initial population split between ANC and DOM/PRZ, and between ANC and DOM after the DOM/PRZ split, but not between ANC and PRZ in agreement with the population model supported by admixture tests. The expansion in the DOM population from 10k BP to now was modelled as an exponential expansion.

| Parameter | Estimated value |
|-----------|-----------------|
|-----------|-----------------|

|                                                                                       |                       |
|---------------------------------------------------------------------------------------|-----------------------|
| Split time between ANC and DOM/PRZ                                                    | 169,351 years BP      |
| Migration rate from ANC to DOM/PRZ (fraction made up of new migrants each generation) | $5.94 \times 10^{-5}$ |
| Split time between DOM and PRZ                                                        | 46,200 years BP       |
| Current effective population size for ANC and PRZ                                     | 1,973                 |

**Supplementary Table S27. The  $\partial\text{a}\partial\text{i}$  maximum-likelihood estimates for the horses demographic inferences**

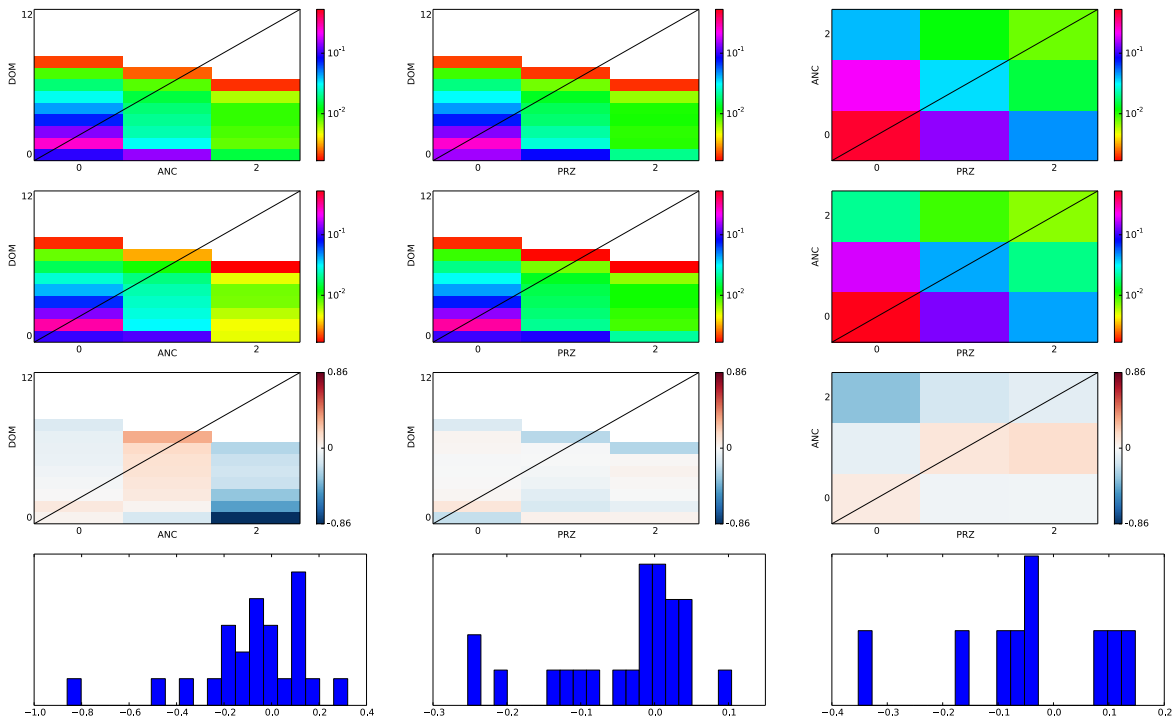

**Supplementary Figure S27. Observed and modeled spectra from  $\partial\text{a}\partial\text{i}$  analyses**

Pairwise Site Frequency Spectra (SFS) of horses from our observed data (upper panel) and from our model estimated using  $\partial\text{a}\partial\text{i}$  (second panel from the top). Residuals (third and fourth panel from the top) show the distance between the data and the model. The first column from left represents the comparison between ANC and DOM, the second between DOM and PRZ, the third between ANC and PRZ. We show 2D-SFS instead of 3D-SFS for ease of visual inspection of the fitting.

## S2.10 Demographic reconstruction based on the nuclear genome information

The depth-of-coverage obtained for CGG10022 (24.27X, Supplementary Table S4) is compatible with the inference of past demographic population sizes using Pairwise Sequentially Markovian Coalescent (PSMC), which requires at least 20X coverage (94). For comparison, the same procedure was applied to the previously published modern horse genomes for which the depth-of-

coverage was sufficient, namely the Thoroughbred (Twilight) (1) and the Icelandic (P5782) (2).

The demographic inferences were performed as described earlier [Orlando *et al.* 2013, see their Supplementary Information section S9.2](1) with slight modifications, namely per-sample maximum coverage threshold. Briefly, a consensus sequence was generated for the autosomes (excluding chrUn) using the BAM files for alignments against the horse reference genome EquCab2.0 (3). SNPs were called using SAMtools (15) v0.1.18 and filtered using the '*vcfutils.pl vcf2fq*' command with the following parameters:

- Minimum depth-of-coverage: 8
- Maximum depth-of-coverage: Supplementary Table S13
- Indels filtered in a windows size of 5 bp
- Minimum RMS mapping quality: 10

The coverage distribution was determined using the '*depths*' tool included with the PALEOMIX pipeline (10), and excludes sites with depth 0. In addition, bases with Phred quality scores inferior to 35 were filtered.

The PSMC inference was run using input parameters recommended by the developers (Number of iterations = 25; maximum  $2N_0$  coalescent time = 15; initial  $\theta/\rho = 5$ ). 100 bootstrap pseudo-replications were performed by splitting chromosomal sequences into shorter fragments of 500 kb and randomly selected among these (with replacement) in order to evaluate the spread of the PSMC reconstructions. For scaling the demographic inferences, we took advantage of the recent recalibration time of all *Equus* species, ranging between 4 to 4.5 Myr (Orlando *et al.* 2013). For a calibration point at 4.5 Myr, the resulting mutation rate used for scaling all PSMC was  $7.242 \times 10^{-9}$  per site per generation. The generation time was set to 8 years (Supplementary Figure S28).

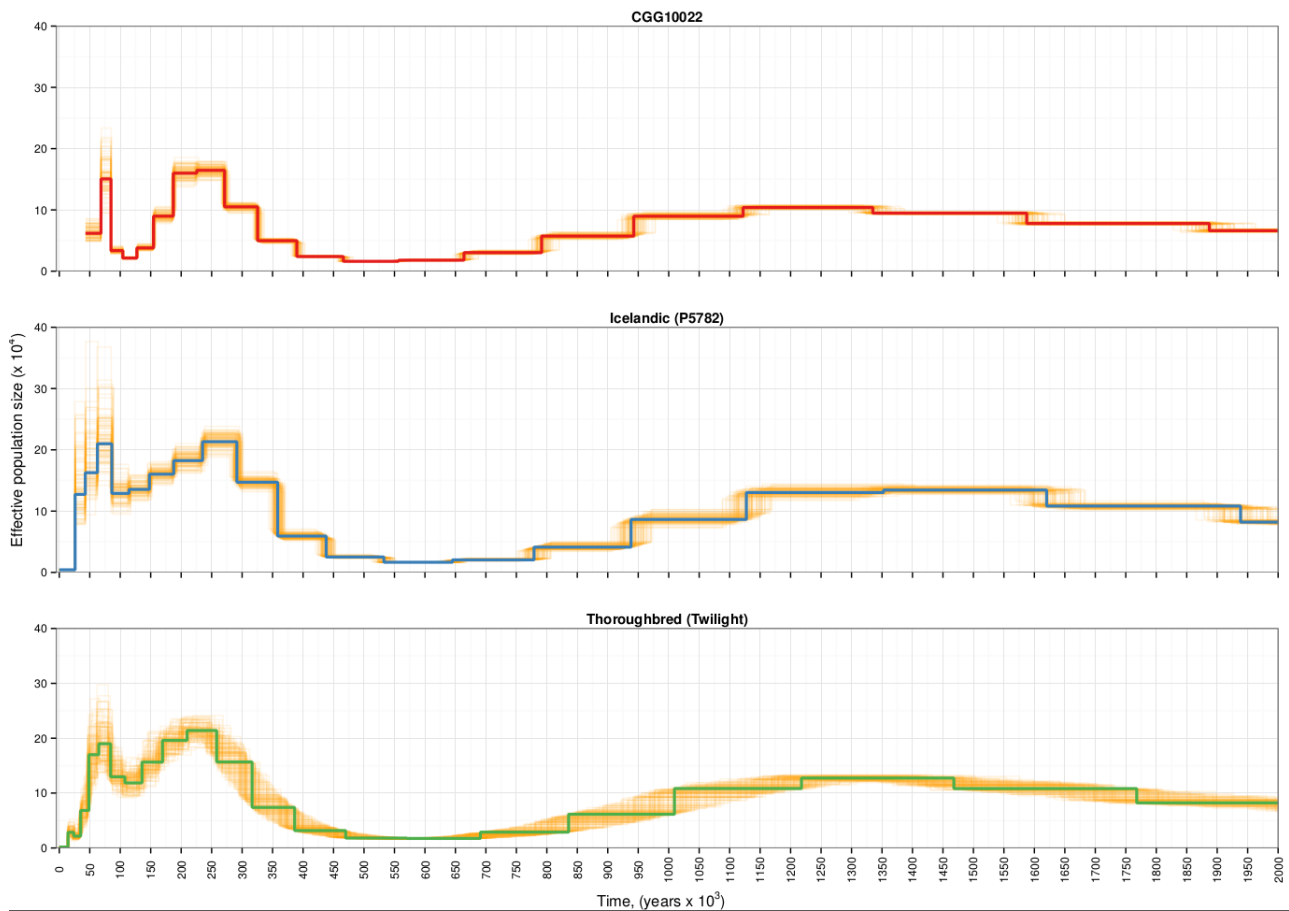

**Supplementary Figure S28. Demographic fluctuations over the last 2 million years**

*The 100 bootstrap pseudo-replications are depicted in yellow for each of the three specimens. The demographic inference and the associated bootstrap pseudo-replications for the pre-domesticated horse (CGG10022) are plotted starting from the sample age, namely 43 kyr BP (Supplementary Table S1).*

## S3 Genetic load and inbreeding

### S3.1 Genetic load in the genomes of modern and pre-domesticated samples

#### S3.1.1 Comparison between modern and pre-domesticated samples

We restricted the analyses described here to the high-coverage genome sequence of specimen CGG10022 and disregarded the sequence data from specimen CGG10023 that showed lower depth-of-coverage and higher error rates (Supplementary Section S1.4 and Supplementary Figure S3). Similarly, we did not measure the genetic load for Twilight, as this specimen corresponds to the individual that was originally sequenced to generate the horse reference sequence EquCab2.0 and is consequently expected to show a deficit in derived alleles, with respect to the reference (3).

We used Genomic Evolutionary Rate Profiling (GERP) scores to quantify the level of evolutionary constraint at each polymorphic site. GERP scores computed from the alignment of 35 mammals to the human genome reference hg19 were downloaded from the UCSC platform (95). GERP scores are defined as the number of substitutions expected under neutrality minus the number of substitutions observed at that position (96). Positive scores, larger than 2, represent a substitution deficit, which is expected for sites under selective constraints; scores smaller than 2, including negative values, indicate that a site is probably evolving neutrally (97). New mutations at constrained sites are expected to be deleterious. We converted the EquCab2.0 genomic coordinates of the horse polymorphic sites into the hg19 coordinates with the liftover tool (95). GERP scores at each site were then extracted using the hg19 coordinates. We validated GERP score calculations by checking that the class of sites associated with GERP scores greater than or equal to 2 (as opposed to the class of sites with GERP scores between -2 and 2) was enriched for exonic and non-synonymous sites (Supplementary Figure S29). Functional classifications into exons and non-synonymous sites were obtained with ANNOVAR applied to the Ensembl horse transcripts (98).

We restricted our analyses to genomic regions corresponding to coding DNA sequences (CDS) from Ensembl v72. The 10 bp upstream and downstream of each exon were also considered to enable calling SNP following the same quality filters as described in Supplemental Section S2.5. For each polymorphic site observed in a given horse sample, we defined the ancestral state using the donkey sequence data. We then computed a measure of genetic load as the product of the GERP score at each site and the number of derived alleles carried by this individual at this site (Supplementary Figure S30), averaged across sites for each individual. We considered only sites with GERP scores  $\geq -2$ , since only those sites are considered as under selection.

We plotted the distributions of genetic loads (Supplementary Figure S31), and performed QQ plots (Supplementary Figure S32) and Kolmogorov-Smirnov tests to compare the distribution of genetic load measures among individuals. The statistical significance of each of those tests is presented in Supplementary Table S28. The full set of analyses was repeated disregarding sites with transitions to limit the bias introduced by nucleotide misincorporations at positions affected by *post-mortem* DNA damage (Supplementary Table S29 and Supplementary Figure S33).

That the high-quality ancient horse genome and the genomes from domesticated horses show different genetic load measures is in line with the 'Cost of Domestication' hypothesis (99-101), which supposes that the repeated bottleneck events associated with domestication have changed the patterns of molecular evolution by limiting the strength of purifying selection. As a result, the genomes of domesticated animals, such as dogs (99), and plants, such as rice (101, 102) and tomatoes (103), but not fungi (104), show an excess of (slightly) deleterious mutations. The difference observed in genetic load values could also result from the higher levels of inbreeding measured in domesticated horses (Figure 2; Supplemental Section S3.2), as homozygous sites contribute to a greater extent than heterozygous sites in the calculation of the genetic load. This is

because GERP scores are counted twice at homozygous sites, while at heterozygous sites, GERP scores are counted only once.

In order to control for the various levels of inbreeding found across individuals, we stratified our analyses across homozygous and heterozygous sites and tested for each category whether the high-quality ancient genome showed significantly fewer mutations at sites under selection than the genomes of domesticated horses and the Przewalski's horse (Supplementary Figure S34). To accomplish this, we first stratified heterozygous and homozygous sites for each individual. We then considered sites with GERP scores in the range between -2 and 2, representing sites under no or very weak selective constraints, and sites with GERP scores greater than or equal to 4, representing sites under strong selective constraint. We next counted the number of sites containing mutations in each of the two classes of sites and calculated the ratio between numbers of mutations for the domestic horses in aggregate, and for the Przewalski's horse by itself. Ratios were calculated separately for sites containing homozygous or heterozygous derived mutations.

We next calculated the odds-ratio between these ratios and the ratios observed for CGG10022 and performed one-sided ("greater") Fisher exact-tests using R. Following correction for multiple tests using Holm-correction, we found that sites under strong selective constraint in the genomes of the domestic horses were enriched for homozygous mutations relative to CGG10022 ( $p_{hom} = 0.033$ ;  $p_{het} = 0.072$ ). We furthermore found that the genome of the Przewalski's horse was enriched for both homozygous and heterozygous mutations at sites under strongly selective constraint ( $p_{hom} = 0.033$ ;  $p_{het} = 0.041$ ).

Overall, our results support the presence of an excess of mutations at sites under selection amongst domestic horses and therefore the 'Cost of domestication' hypothesis. Interestingly, a similar excess was found in the genome of the Przewalski's horse, which has never been successfully domesticated, most likely as a result of the recent massive bottleneck experienced following the foundation of the captive stock from only 13 individuals (105).

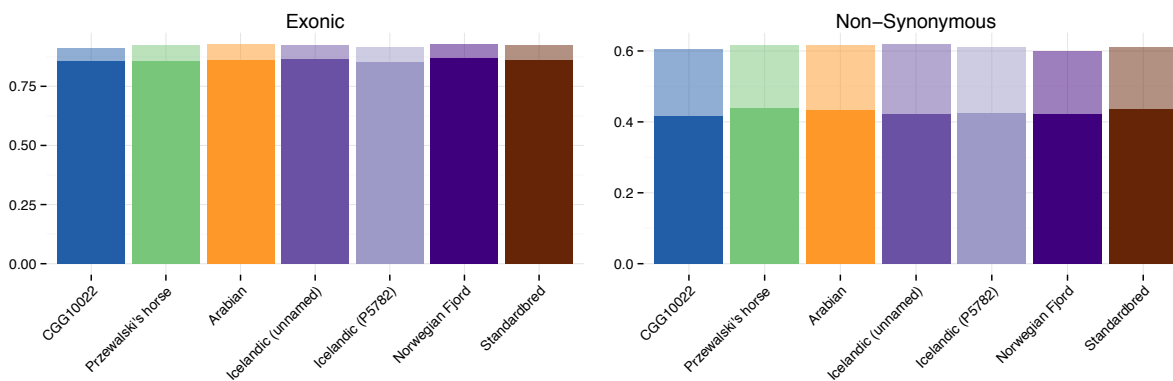

**Supplementary Figure S29 Mutations stratified by GERP scores and annotation**

Plot showing the fraction of sites with a given annotation (exonic or non-synonymous), stratified by GERP score. The dark bars show the fraction of sites for GERP scores in the range [-2; 2[, superimposed on the lighter bars showing the fraction of sites for GERP scores in the range [2;].

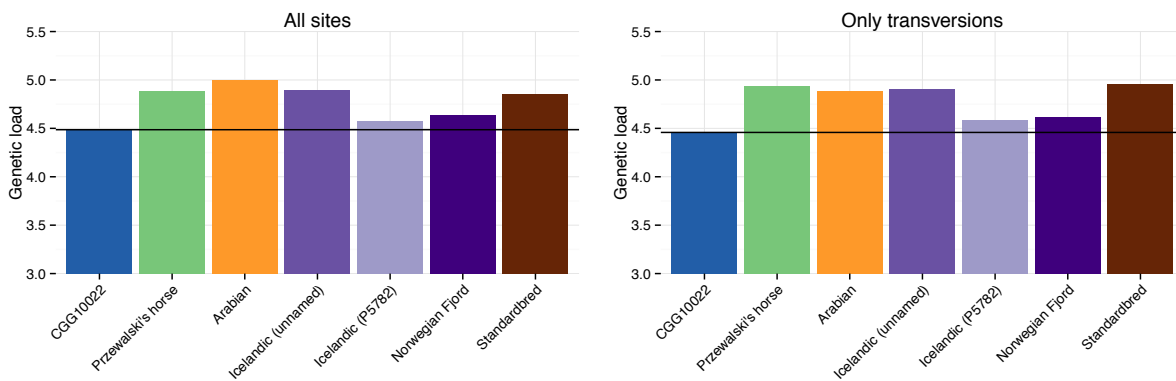

**Supplementary Figure S30 Genetic load calculated for sites with / without transitions**

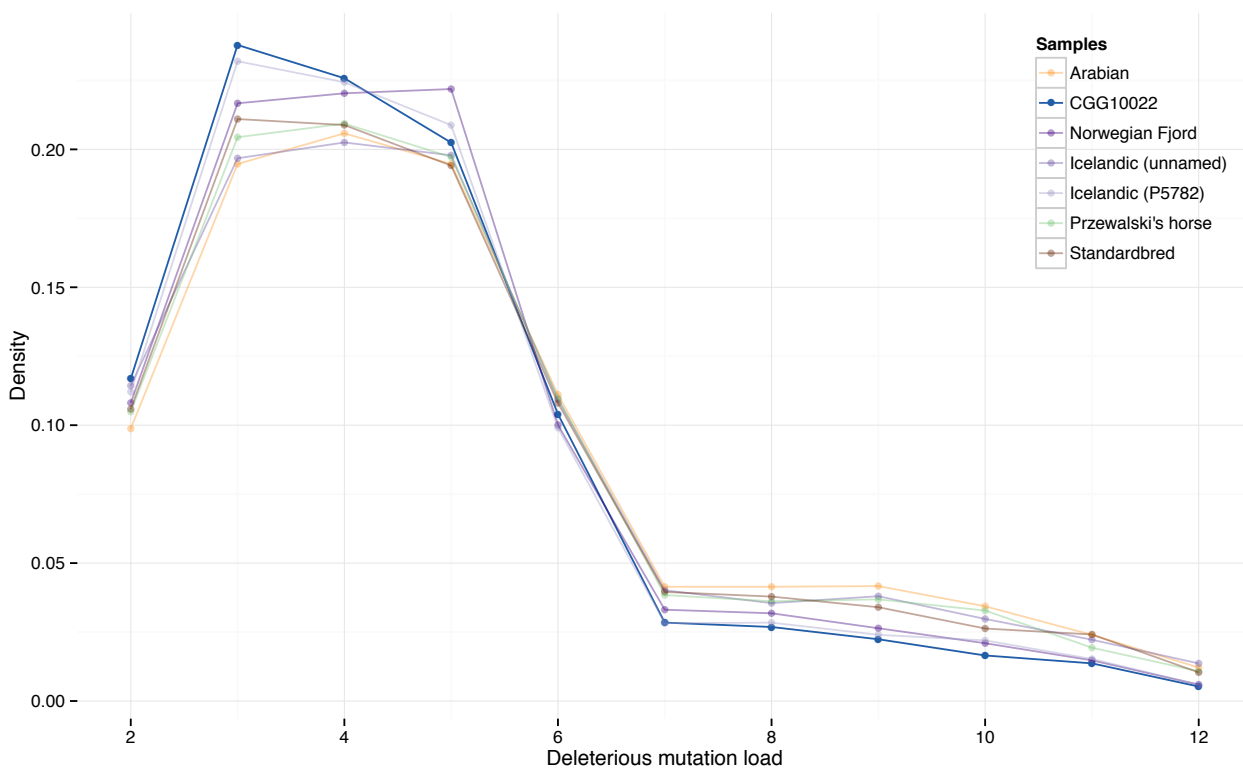

**Supplementary Figure S31 Distribution of genetic loads**

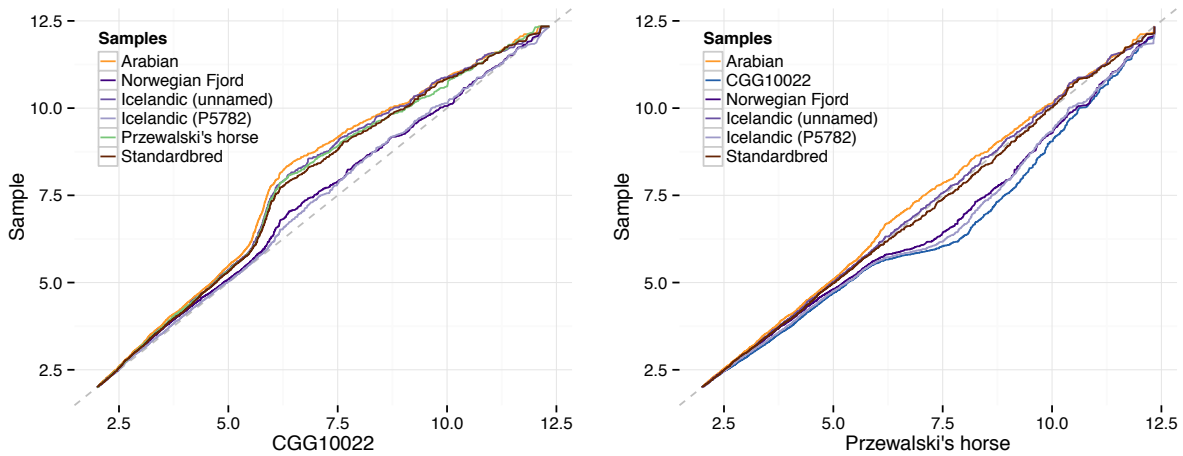

**Supplementary Figure S32 QQ-plots of genetic load vs CGG10022 / Przewalski's horse (all sites)**

| Vs                 | Sample              | p-value                | q-value                                  |
|--------------------|---------------------|------------------------|------------------------------------------|
| CGG10022           | Arabian             | $0.00 \times 10^0$     | <b><math>0.00 \times 10^0</math></b>     |
| CGG10022           | Norwegian Fjord     | $5.28 \times 10^{-4}$  | <b><math>2.64 \times 10^{-3}</math></b>  |
| CGG10022           | Icelandic (unnamed) | $1.24 \times 10^{-9}$  | <b><math>9.94 \times 10^{-9}</math></b>  |
| CGG10022           | Icelandic (P5782)   | $2.25 \times 10^{-1}$  | $6.74 \times 10^{-1}$                    |
| CGG10022           | Przewalski's horse  | $2.86 \times 10^{-11}$ | <b><math>3.15 \times 10^{-10}</math></b> |
| CGG10022           | Standardbred        | $1.36 \times 10^{-10}$ | <b><math>1.22 \times 10^{-9}</math></b>  |
| Przewalski's horse | Arabian             | $8.26 \times 10^{-2}$  | $3.30 \times 10^{-1}$                    |
| Przewalski's horse | CGG10022            | $2.86 \times 10^{-11}$ | <b><math>3.15 \times 10^{-10}</math></b> |
| Przewalski's horse | Norwegian Fjord     | $2.36 \times 10^{-5}$  | <b><math>1.41 \times 10^{-4}</math></b>  |
| Przewalski's horse | Icelandic (unnamed) | $9.30 \times 10^{-1}$  | $9.30 \times 10^{-1}$                    |
| Przewalski's horse | Icelandic (P5782)   | $4.95 \times 10^{-9}$  | <b><math>3.47 \times 10^{-8}</math></b>  |
| Przewalski's horse | Standardbred        | $3.90 \times 10^{-1}$  | $7.81 \times 10^{-1}$                    |

**Supplementary Table S28 Kolmogorov-Smirnov test of genetic loads (all sites)**

Significant tests (after correction for multiple tests) are shown in bold.



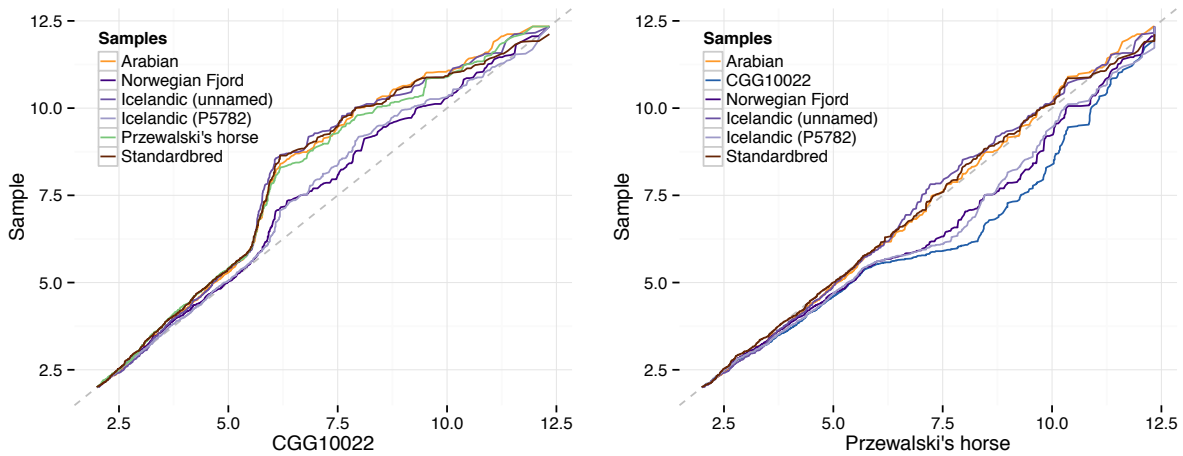

**Supplementary Figure S33 QQ-plots of genetic load scores vs CGG10022 / Przewalski's horse (tv only)**

| Vs                 | Sample              | p-value               | q-value                                 |
|--------------------|---------------------|-----------------------|-----------------------------------------|
| CGG10022           | Arabian             | $7.09 \times 10^{-5}$ | <b><math>6.38 \times 10^{-4}</math></b> |
| CGG10022           | Norwegian Fjord     | $2.85 \times 10^{-1}$ | $1.00 \times 10^0$                      |
| CGG10022           | Icelandic (unnamed) | $1.65 \times 10^{-3}$ | <b><math>9.87 \times 10^{-3}</math></b> |
| CGG10022           | Icelandic (P5782)   | $5.07 \times 10^{-1}$ | $1.00 \times 10^{+0}$                   |
| CGG10022           | Przewalski's horse  | $9.97 \times 10^{-6}$ | <b><math>1.10 \times 10^{-4}</math></b> |
| CGG10022           | Standardbred        | $5.76 \times 10^{-6}$ | <b><math>6.91 \times 10^{-5}</math></b> |
| Przewalski's horse | Arabian             | $5.46 \times 10^{-1}$ | $1.00 \times 10^0$                      |
| Przewalski's horse | CGG10022            | $9.97 \times 10^{-6}$ | <b><math>1.10 \times 10^{-4}</math></b> |
| Przewalski's horse | Norwegian Fjord     | $8.10 \times 10^{-4}$ | <b><math>5.67 \times 10^{-3}</math></b> |
| Przewalski's horse | Icelandic (unnamed) | $3.41 \times 10^{-1}$ | $1.00 \times 10^0$                      |
| Przewalski's horse | Icelandic (P5782)   | $1.65 \times 10^{-4}$ | <b><math>1.32 \times 10^{-3}</math></b> |
| Przewalski's horse | Standardbred        | $8.70 \times 10^{-1}$ | $1.00 \times 10^0$                      |

**Supplementary Table S29 Kolmogorov-Smirnov test of genetic loads (transversions only)**  
 Significant tests (after correction for multiple tests) are shown in bold.

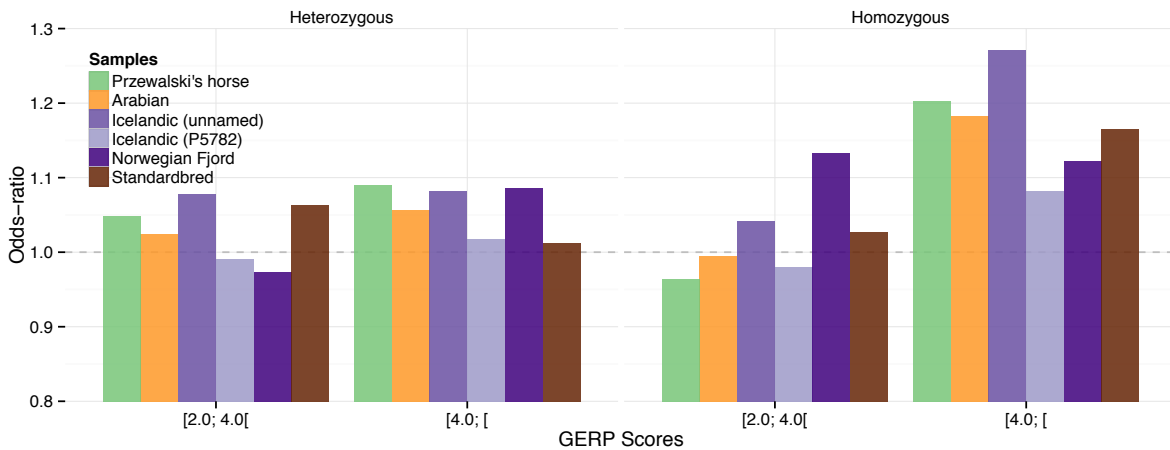

**Supplementary Figure S34 Odds-ratios vs CGG10022 for GERP scores across homo/heterozygous sites**

### S3.1.2 Comparison of the Przewalski's horse with domestic breeds

To determine if the deleterious mutation load observed for the Przewalski's horse differed from that observed for the domesticated horses, sites in coding regions containing SNPs in at least one modern breed were stratified according to the GERP scores, and the number of differences calculated for trios of horses. Each trio included the high-quality pre-domesticated sample (CGG10022), the Przewalski's horse, and one domestic horse. Differences were calculated by pairwise comparisons between the pre-domesticated horse and the two modern horses (Przewalski's and domestic), counting any site that did not match the pre-domestic horse as 1 difference. For a given trio, only sites for which all 3 samples were called were included in the comparison. The Thoroughbred (Twilight) was excluded from the comparison.

The fractions of sites differing from the pre-domesticated horse were calculated for each modern horse in a trio, stratified by the two classes of GERP scores described in Supplementary Section S3.1.1 (namely scores  $[-2;2[$  and scores  $[4;[$ ). More specifically, these fractions were calculated as the number of sites showing differences (as defined above) to the pre-domestic horse divided by the total number of sites in the class, for a given trio. The odds-ratios were calculated as the ratio of these two fractions. 100 bootstrap pseudo-replicates were performed by sampling with replacement among the set of sites which were included in at least one comparison, and estimating the ratio of fractions as described above. The overlapping intervals are consistent with the hypothesis that rates are similar/same between the modern horses and the Przewalski's horse (Supplementary Figure S35).

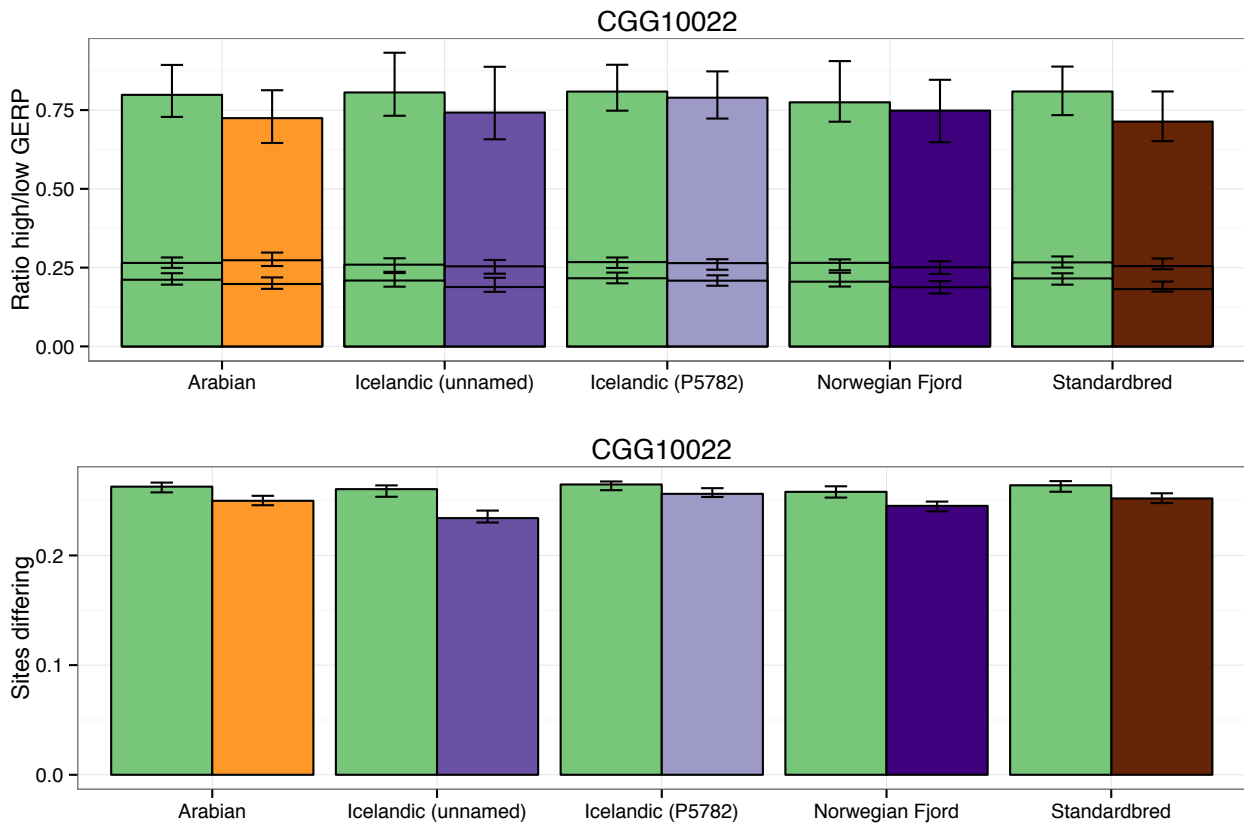

**Supplementary Figure S35. GERP scores for CGG10022**

The top plot shows the ratios of sites stratified according to the top/bottom 5% of GERP scores. The two smaller error bars indicate the rates observed for each of these classes respectively. The bottom plot shows the overall rate of differences across all sites. Error bars were estimated using 100 bootstrap pseudo-replicates. Each pair of bars represent a comparison with the Przewalski's horse (green).

### S3.2 Estimation of inbreeding in domestic and wild horses

Inbreeding in the domestic and wild horses was estimated using a methodology similar to that detailed in Prüfer *et al.* 2013 [see their Supplementary Information section S10] (106), in which the proportion of mostly homozygous genomic segments is calculated. These regions are termed homozygous-by-descent (HBD) in the following section, in line with Prüfer *et al.* (106).

To detect HBD regions, heterozygosity was estimated across the samples by calculating the  $\hat{\theta}_w$  for sliding windows of 50 kb with a 10 kb step size (Supplementary Section S1.6), excluding regions where less than 90% of bases (45 kb) were covered, and excluding transitions to account for the presence of *post-mortem* DNA damage in CGG10022 and CGG10023 (plots with transitions available upon request). Segments with local changes in  $\hat{\theta}_w$  values were estimated using the R package 'changepoints' (<http://cran.r-project.org/web/packages/changepoint/index.html>) using the binary segmentation algorithm. Segment coordinates and corresponding heterozygosity estimates (mean  $\log(\hat{\theta}_w)$ ) were extracted (Supplementary Figure S36 and Supplementary Figure S37), and segments were plotted according to the segment length and heterozygosity estimate for each sample (Supplementary Figure S38). We excluded chromosome X from male individuals.

A bimodal distribution indicates inbreeding in the corresponding individual. The R package 'turnpoints' (<http://www.sciviews.org/pastecs/>) was used to determine the coordinate of the lowest point (pit) between the two modes for bimodal distributions, indicated by a vertical red line on the plots (Supplementary Figure S38), providing a threshold used to group genomic segments into the categories 'high' and 'low' heterozygosity. The proportion of HBD tracks was subsequently calculated as the total size of 'low' heterozygosity regions divided by the total size of all regions (value shown adjacent to the line indicating the turnpoint).

The results suggest that the Arabian, Standardbred, and Thoroughbred (Twilight) are the most inbred individuals, although all modern horses appear to be inbred to some extent (4.1 - 29.8% regions HBD). This is expected for the Thoroughbred (Twilight) as this individual was selected for the *Equus caballus* reference genome because of its high level of inbreeding (3). Lower levels of inbreeding were observed for the Icelandic horses, the Norwegian Fjord, and the Przewalski's horse (4.1 - 13.8% regions HBD). The latter is encouraging in light of efforts to preserve the Przewalski's horse as representing the last remaining truly wild horses (1). Low to non-existent levels of inbreeding were detected for the two pre-domesticated specimens, in line with the high amount of genetic variability known to predate domestication (107), while the current population of Przewalski's horses derive from a small population of captured individuals, of which only 12 individuals contributed to the current population (108).

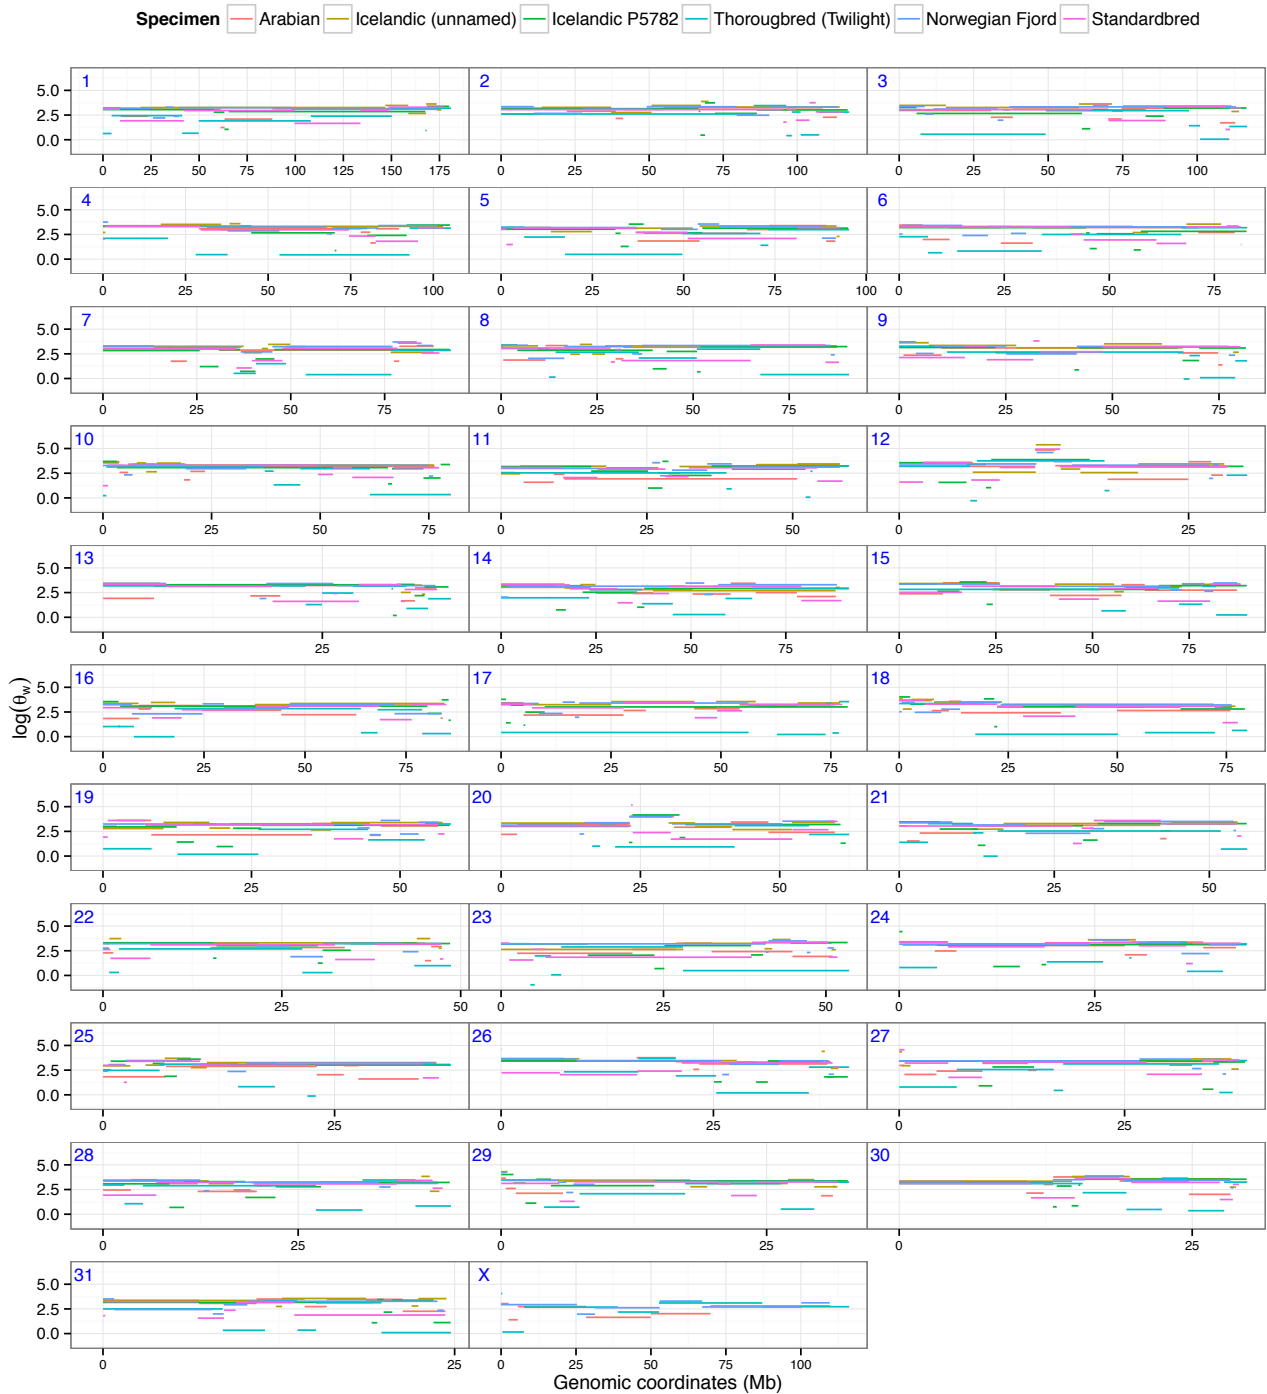

**Supplementary Figure S36. Heterozygosity of genomic regions for domestic horses**

Blue numbers in the upper-left corner of plots indicate the chromosome. Heterozygosity was estimated across the samples by calculating the  $\hat{d}_w$  for sliding windows of 50 kb with a 10 kb step size, excluding regions where less than 90% of bases (45 kb) were covered. Transitions were excluded to allow comparison with pre-domesticated samples.

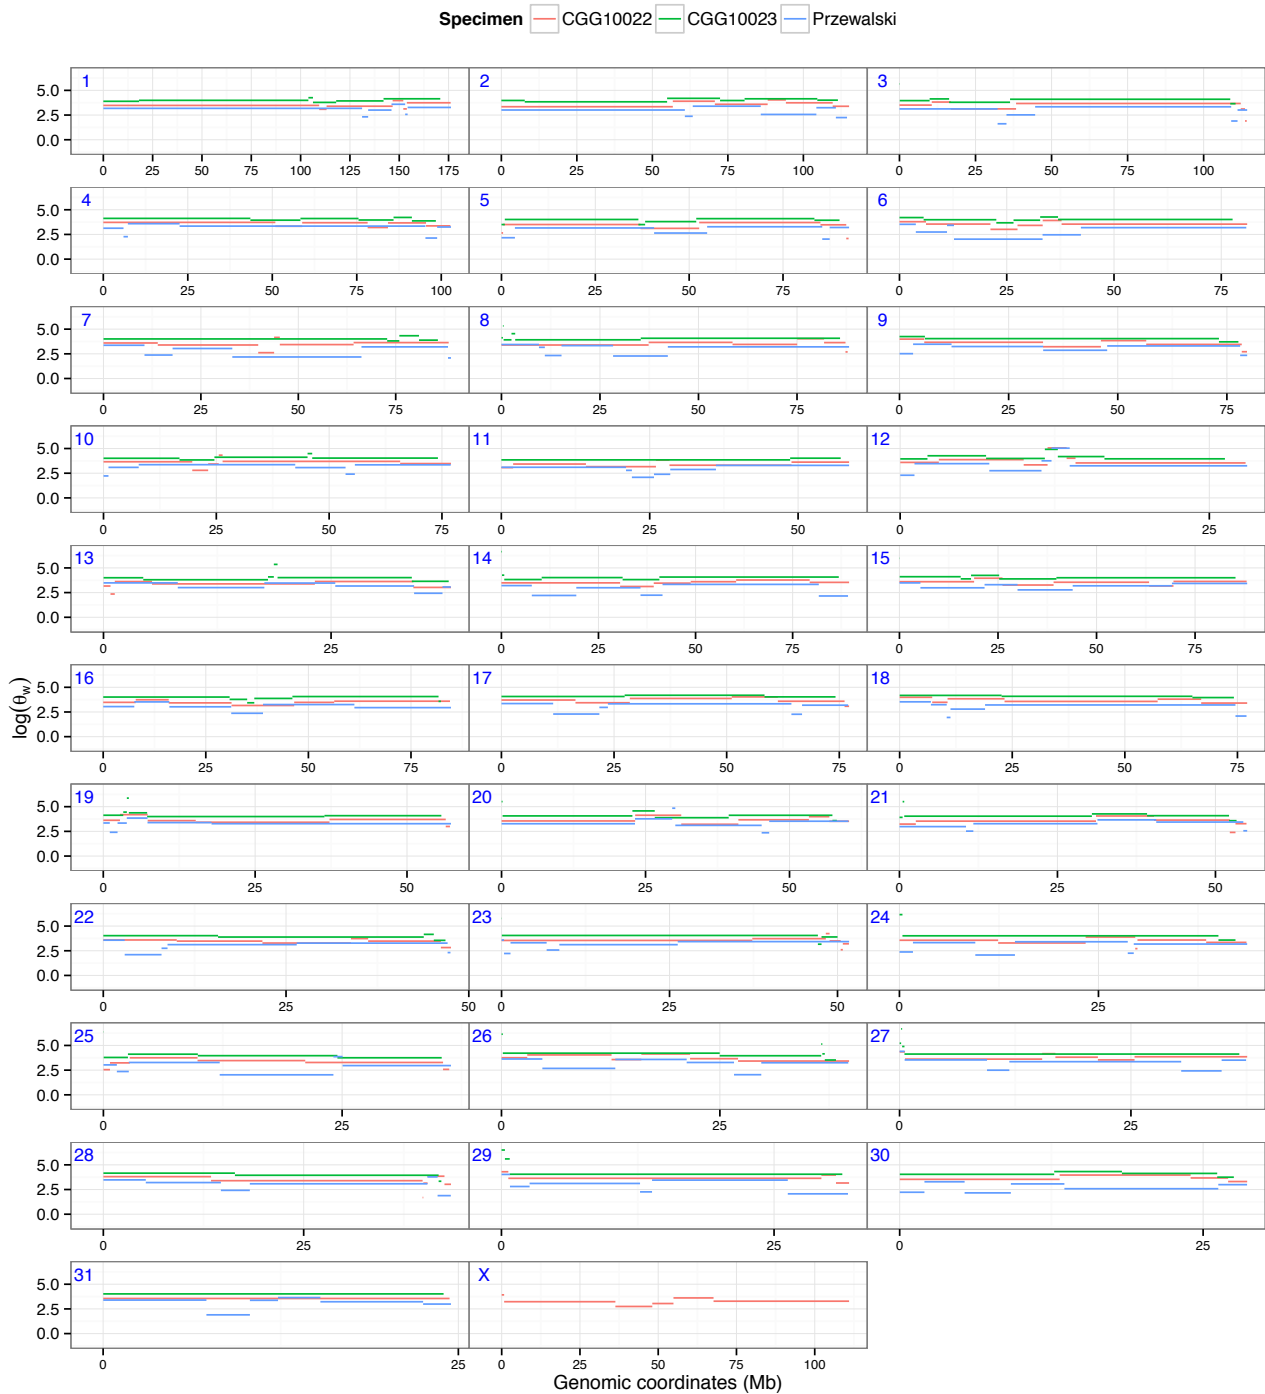

**Supplementary Figure S37. Heterozygosity of genomic regions for wild horses**

Blue numbers in the upper-left corner of plots indicate the chromosome. Heterozygosity was estimated across the samples by calculating the  $\hat{\theta}_w$  for sliding windows of 50 kb with a 10 kb step size, excluding regions where less than 90% of bases (45 kb) were covered. Transitions were excluded to allow comparison with pre-domesticated samples.

**A**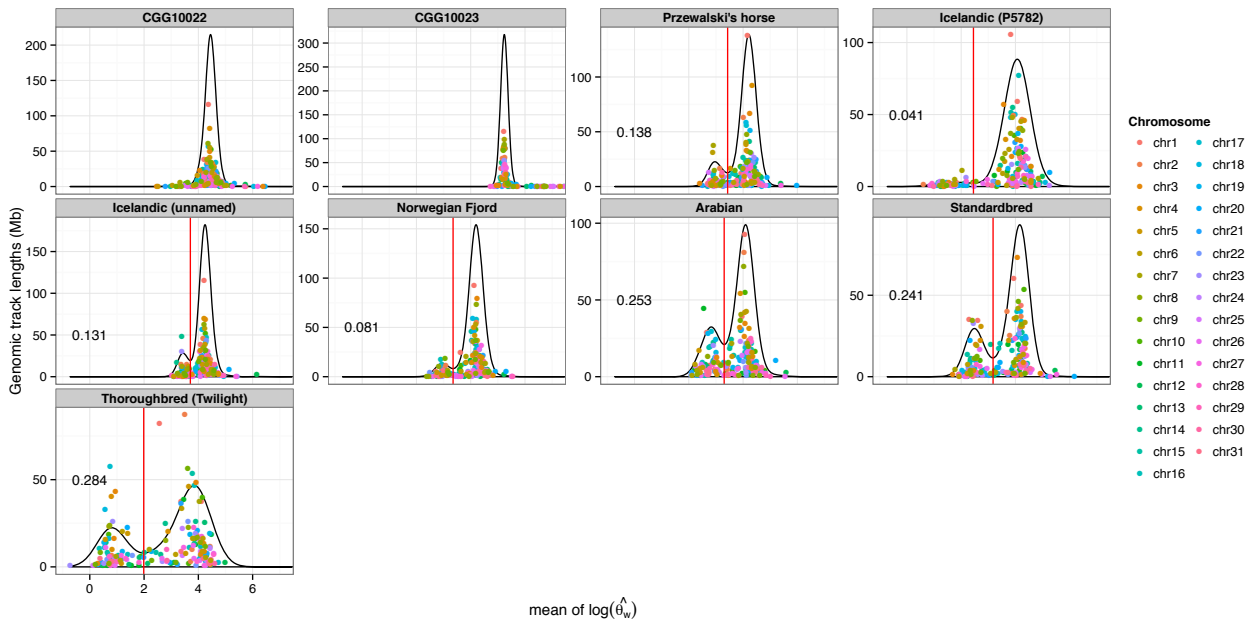**B**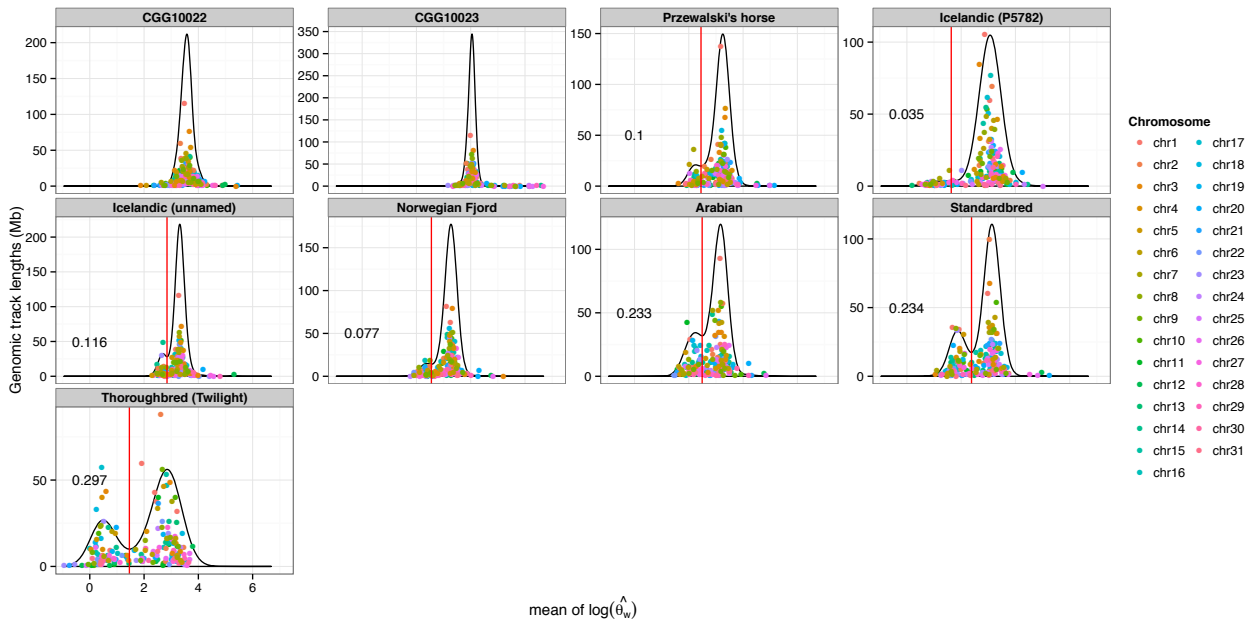

### Supplementary Figure S38. Inbreeding coverage estimates for domestic and wild horses

(A) Inbreeding estimates calculated using both transitions and transversions; (B) Inbreeding estimates calculated using only transversions. The average level of inbreeding coverage is indicated for bi-modal distributions. Unimodal distributions suggested low levels of inbreeding, if any. In such case, the average level of inbreeding is left undetermined.

## S4 Selection scans

### S4.1 Screening for positive selection using PAML

Transcripts for which at least 80% of sites were called (across all samples) were selected from the 20,384 transcripts genotyped for the phylogenetic inference (Supplementary Section S2.5), yielding 9,663 candidates. PAML (109) 'codeml' was subsequently used to estimate the number of synonymous and non-synonymous substitutions at each branch, using the topology inferred as described in the section "Phylogenetic Inference", while allowing a different  $\omega$  for each branch (model = 1), with no clock, F3X4 codon frequencies, no dN/dS variation among sites,  $\kappa$  fixed at 2.2 as determined from the substitution type counts between the domestic donkey genome and modern horse genomes (Orlando et al. 2013, see their Supplemental section S10.1.c). Genes for which there were at least 2 non-synonymous substitutions in the domestic clade, and for which the  $\omega$  of the domestic clade was both  $> 1$  and greater than the background were selected for subsequent analysis, yielding a total of 454 candidate genes.

PAML 'codeml' was run on the 454 selected genes, allowing 2 possible values for  $\omega$ ; one value for the domestic clade and one value for the rest of the tree. In addition, a null model in which a single  $\omega$  was assigned to the entire tree was used. To account for problems with the numerical optimization in PAML, each test was run twice, with different starting values for  $\omega$  (1.5 and 3.0); if the log-likelihood of a test for a given gene was lower than that of the null test, PAML codeml was re-run for that gene. Subsequently, the best model was selected for both the null model and the test based on the log-likelihood of each pair of tests, and the likelihood-ratio test LRT was calculated for each gene.

Due to the highly conserved nature of protein coding genes, the LRT scores do not follow a Chi<sup>2</sup> distribution, and could therefore not be used directly to determine  $p$ -values of tests. To detect statistically significant tests,  $q$ -values were estimated using a false discovery rate (FDR) modulated sequential MC algorithm (110); for each simulation, the parameters derived from the null model for the gene were used to simulate sequences of the same length as the gene using PAML 'evolver'. PAML 'codeml' was run as described above for the genes themselves. For each simulation for each gene, the resulting LRT was compared with the LRT observed for a given gene, with a cut-off value ( $h$ ) of 10 LRT values at least as significant as that observed for the real sequences. Consequently, 36 genes were selected with a FDR of 5% (Supplementary Table S30).

Notably, among these genes are two olfactory receptors (*OR4E2* and *OR2A25*), and one gene involved in the regulation of axon growth in olfactory sensory neurons (*RAP1GAP2*). Olfactory receptors were similarly observed for genomic scans of the domesticated pig (*Sus scrofa*) (111), suggesting a potential commonality in the effect of domestication of these species. In addition to olfactory genes, several genes (*ADAMTS1*, *PLEKHM1*, *RTRD1*, and *THSD7A*) have been observed to relate to bone structure, potentially resulting from the use of the horse as a draft animal. The gene *SYNJ2* is furthermore known to be a longevity gene candidate in humans, with SNPs in this gene associated with statistically significant changes in levels of agreeableness (112, 113).



| Ensembl Gene ID    | Gene Name       | q-value | $\omega(\text{null})$ | $\omega(\text{bg})$ | $\omega(\text{domestic})$ |
|--------------------|-----------------|---------|-----------------------|---------------------|---------------------------|
| ENSECAG00000000264 | <i>DCT</i>      | 0.048   | 0.149                 | 0.049               | 88.628                    |
| ENSECAG00000000292 | <i>THSD7A</i>   | 0.031   | 0.138                 | 0.061               | $\infty$                  |
| ENSECAG00000001279 | <i>AGTR1</i>    | 0.031   | 0.272                 | 0.000               | $\infty$                  |
| ENSECAG00000002752 | <i>OR4E2</i>    | 0.031   | 0.440                 | 0.145               | $\infty$                  |
| ENSECAG00000002769 |                 | 0.031   | 0.262                 | 0.000               | $\infty$                  |
| ENSECAG00000006310 | <i>OR2A25</i>   | 0.048   | 0.204                 | 0.000               | 218.467                   |
| ENSECAG00000007936 | <i>SARDH</i>    | 0.031   | 0.061                 | 0.020               | $\infty$                  |
| ENSECAG00000008303 | <i>LAMB1</i>    | 0.035   | 0.217                 | 0.158               | 104.501                   |
| ENSECAG00000008427 | <i>SLC43A1</i>  | 0.031   | 0.238                 | 0.000               | $\infty$                  |
| ENSECAG00000010028 |                 | 0.048   | 0.076                 | 0.059               | $\infty$                  |
| ENSECAG00000010092 | <i>POLR1A</i>   | 0.031   | 0.058                 | 0.035               | 168.09                    |
| ENSECAG00000010370 | <i>CDK5RAP1</i> | 0.031   | 0.257                 | 0.000               | 18.475                    |
| ENSECAG00000010758 | <i>KIF24</i>    | 0.050   | 0.633                 | 0.361               | $\infty$                  |
| ENSECAG00000011312 | <i>RTDR1</i>    | 0.031   | 0.163                 | 0.000               | $\infty$                  |
| ENSECAG00000011659 | <i>KIAA1549</i> | 0.031   | 0.335                 | 0.237               | 330.347                   |
| ENSECAG00000012056 | <i>MLXIP</i>    | 0.035   | 0.222                 | 0.110               | 443.218                   |
| ENSECAG00000012646 | <i>SYNJ2</i>    | 0.035   | 0.190                 | 0.100               | 1.894                     |
| ENSECAG00000013824 | <i>POC5</i>     | 0.031   | 0.209                 | 0.031               | $\infty$                  |
| ENSECAG00000014500 | <i>ART5</i>     | 0.031   | 0.189                 | 0.000               | 428.945                   |
| ENSECAG00000014501 | <i>TMEM54</i>   | 0.048   | 0.702                 | 0.000               | $\infty$                  |
| ENSECAG00000015852 | <i>GOT1L1</i>   | 0.048   | 0.201                 | 0.000               | $\infty$                  |
| ENSECAG00000016339 | <i>ADAMTS1</i>  | 0.031   | 0.085                 | 0.000               | 8.039                     |
| ENSECAG00000016408 | <i>CABP4</i>    | 0.050   | 0.163                 | 0.000               | 0.813                     |
| ENSECAG00000017284 | <i>ANKDD1A</i>  | 0.048   | 0.108                 | 0.023               | 1.123                     |
| ENSECAG00000018068 | <i>MROH2B</i>   | 0.031   | 0.208                 | 0.113               | $\infty$                  |
| ENSECAG00000018566 | <i>TMEM63A</i>  | 0.048   | 0.074                 | 0.049               | $\infty$                  |
| ENSECAG00000019738 | <i>MTMR3</i>    | 0.050   | 0.346                 | 0.172               | $\infty$                  |
| ENSECAG00000020278 | <i>RAP1GAP2</i> | 0.035   | 0.158                 | 0.063               | 127.614                   |
| ENSECAG00000021040 | <i>CDC42BPB</i> | 0.031   | 0.353                 | 0.253               | $\infty$                  |
| ENSECAG00000022722 | <i>ESPL1</i>    | 0.048   | 0.162                 | 0.129               | 218.485                   |
| ENSECAG00000022735 | <i>DOPEY2</i>   | 0.031   | 0.176                 | 0.136               | 375.465                   |
| ENSECAG00000023888 | <i>ALDH1L2</i>  | 0.031   | 0.091                 | 0.000               | $\infty$                  |
| ENSECAG00000024194 | <i>POLA2</i>    | 0.031   | 0.080                 | 0.000               | $\infty$                  |
| ENSECAG00000024397 | <i>UBR4</i>     | 0.041   | 0.110                 | 0.081               | 1.313                     |
| ENSECAG00000024405 | <i>CATSPER1</i> | 0.048   | 0.180                 | 0.085               | 1.406                     |
| ENSECAG00000025023 | <i>PLEKHM1</i>  | 0.031   | 0.110                 | 0.044               | $\infty$                  |

**Supplementary Table S30. Genes undergoing positive selection in the domestic clade**

The infinity symbol signifies that maximum value allowed by 'codeml' during the model optimization stage (999.0);  $\omega(\text{null})$  signifies the global  $\omega$  of the null model,  $\omega(\text{bg})$  and  $\omega(\text{domestic})$  signifies the omegas of the background (wild horses and the domestic donkey (Willy)) and the domestic horses respectively.

## S4.2 Screening for selective sweeps using $\hat{\theta}_w$ and Tajima's D statistic

### S4.2.1 Overall methodology

Regions in which the domestic horses show low genetic diversity and deviation from neutrality as compared to either the pre-domesticated horses or Przewalski's horses are proposed as candidates for evolving under selection since the onset of horse domestication. To identify such regions, the genomes were analyzed by calculating the Watterson estimator ( $\hat{\theta}_w$ ) (18) and Tajima's D statistic (114) using a sliding window approach. To compensate for missing data and the variation in the depth-of-coverage across the different genomes (ranging from 7.44× to 32.66×; Supplementary Table S1) an empirical Bayes method based on genotype likelihoods was used to calculate the posterior probabilities for the sample frequency spectrum using a maximum likelihood estimate of the site frequency spectrum as the prior (115). The implementation is available in the software *angsd* (<http://www.popgen.dk/angsd>). In addition to  $\hat{\theta}_w$ , the nucleotide diversity ( $\pi$ ) was estimated and used for the Tajima's D statistic. The prior was estimated on chromosome 22 for each set, and was used to screen the genomes using a window size of 50 kb and a step size of 10 kb. Only the genomic windows in which at least 90% of bases were covered were considered in order to avoid coverage-related bias.

For each genomic window, the  $\hat{\theta}_w$  log-ratio was calculated as  $\ln(\hat{\theta}_{wPD}) - \ln(\hat{\theta}_{wD})$ , where  $\hat{\theta}_{wPD}$  is the Watterson estimator for the pre-domesticated horse genomes, and  $\hat{\theta}_{wD}$  is the Watterson estimator for the domestic horse genomes, using the natural logarithm. Selective sweeps results in decreased variation in regions under positive natural selection (116), causing a local increase in the ratio calculated above. For modern horse breeds the Tajima's D statistic was calculated using the same sliding windows approach in order to detect deviation from neutrality; more specifically, selective sweeps decrease the amount of polymorphism around the site under selection, resulting in a negative Tajima's D value. Therefore, candidate genomic regions are selected when a local increase in the  $\hat{\theta}_w$  log-ratio is associated with a decrease of the Tajima's D statistic for modern horses within the same region.

For ancient specimens, *post-mortem* DNA damage artificially increases the nucleotide diversity and consequently the  $\hat{\theta}_w$  log-ratio. Supplementary Figure S39 shows the correlation between the  $\hat{\theta}_w$  of pre-domesticated horses, calculated with or without transition, which indicates that the presence of *post-mortem* DNA damage results in a *global* - but importantly, not a local - shift in the  $\hat{\theta}_w$ . As a consequence, the relationship between the  $\hat{\theta}_w$  of different genomic regions remains constant, and the presence of *post-mortem* DNA is not expected to lead to an increase in the false discovery rate.

Three scans using the  $\hat{\theta}_w$  log-ratio were performed: In analysis I (Supplementary Section S4.2.2), we calculated the  $\hat{\theta}_w$  log-ratios for the domestic horses and the pre-domesticated horses, but excluded the Icelandic (P5782); in analysis II (Supplementary Section S4.2.4), we calculated the  $\hat{\theta}_w$  log-ratios for *all* of the domestic horses and the pre-domesticated horses; and in analysis III (Supplementary Section S4.2.5) we calculated the  $\hat{\theta}_w$  log-ratio the domesticated horses, and Przewalski's horse, but excluded the Icelandic (P5782). Analyses were performed with and without the Icelandic (P5782) on the ground that it was sequenced using a different technology than the remaining samples, and could therefore potentially introduce a systematic bias in the analyses.

### S4.2.2 Analysis I: Determining outliers in $\hat{\theta}_w$ log-ratio and Tajima's D values

The procedure to extract outliers was defined as follows: A cubic spline was fitted to the  $\hat{\theta}_w$  log-ratio and Tajima's D values from all genomic windows, using the R function *smooth.spline* (26).

Peaks and pits (local increase and decrease) were determined using the *turnpoints* function in the R package 'pastecs' (<http://cran.r-project.org/web/packages/pastecs/>). The obtained pits and peaks were then used to define the limits of genomic regions showing a local increase and decrease for the  $\hat{\theta}_w$  log-ratio, and Tajimas's D values respectively. In the regions defined by the pits and peaks, mean values for the summary statistics ( $\hat{\theta}_w$  log-ratio and Tajima's D) were computed. A normal approximation was applied to the summary statistics averages for the peaks/pits defined regions (Supplementary Figure S40). Outliers were defined as values found greater than the 95% upper predictive quantile for the  $\hat{\theta}_w$  log-ratio (red points; Supplementary Figure S40, left) and less than the 5% lower predictive quantile for the Tajima's D values (red points; Supplementary Figure S40, right panel). The resulting outliers are depicted as triangles on Supplementary Figure S41.

57 candidate regions with a significantly higher  $\hat{\theta}_w$  log-ratio were detected and are reported in Supplementary Table S31. Among those regions, 16 also intersect with regions showing significant low Tajima's D. The intersection of these regions is reported in Supplementary Table S32. The quantile-quantile plot of the summary statistics for the Tajima's D demonstrate that the outliers do not deviate from the normal distribution quantile (Supplementary Figure S40). Hence, using modern domestic horses does not bring the sensitivity needed to detect deviation from neutrality. Thus intercepting high  $\hat{\theta}_w$  log-ratio and low Tajima's D is over-conservative for identifying the candidate regions for selection.

Of note, those 16 candidate regions also include two genes identified in previous genome selection scans: *MC1R* (chr3: 35,115,000 - 37,265,000) which plays a role in coat color; and *KITLG* (chr28: 14,375,000 - 15,135,000), a ligand that was previously identified as a potential gene under selection while scanning modern domestic horse genomes (1). *KITLG* encodes a ligand which is a pleiotropic factor involved in fertility, neural cell development and hematopoiesis, and which is associated with the roan coat-color in cattle (*Bos taurus*; gene symbol *MGF*) (117).

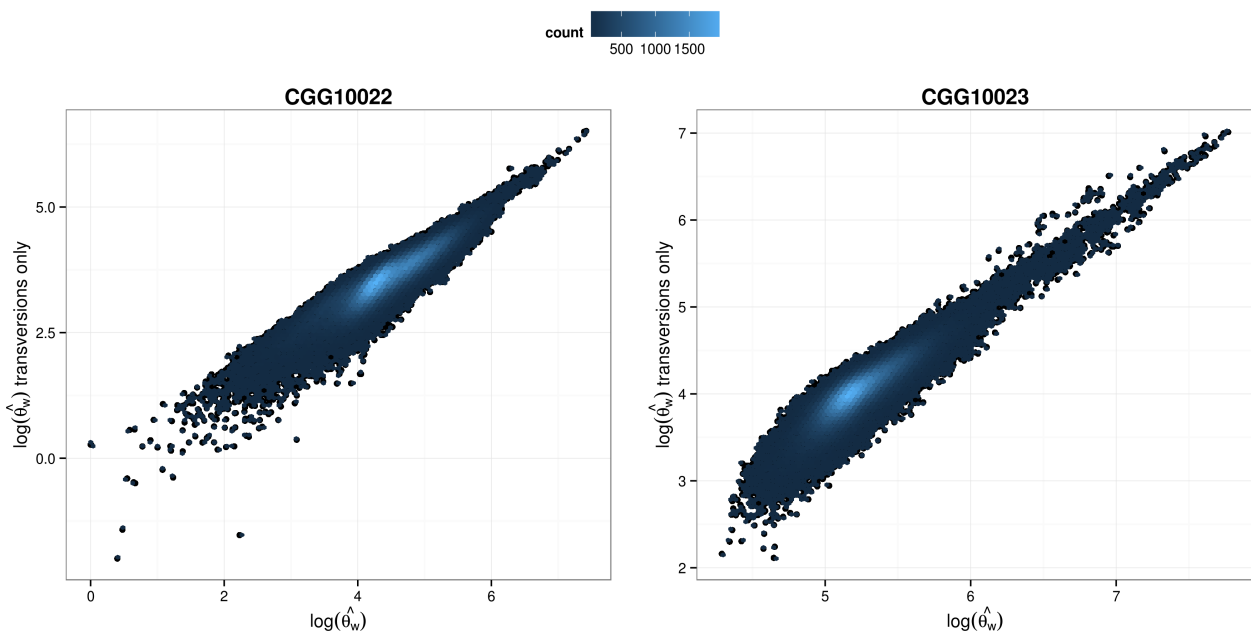

**Supplementary Figure S39. Correlation between  $\hat{\theta}_w$  log values with or without transitions for pre-domesticated horses**

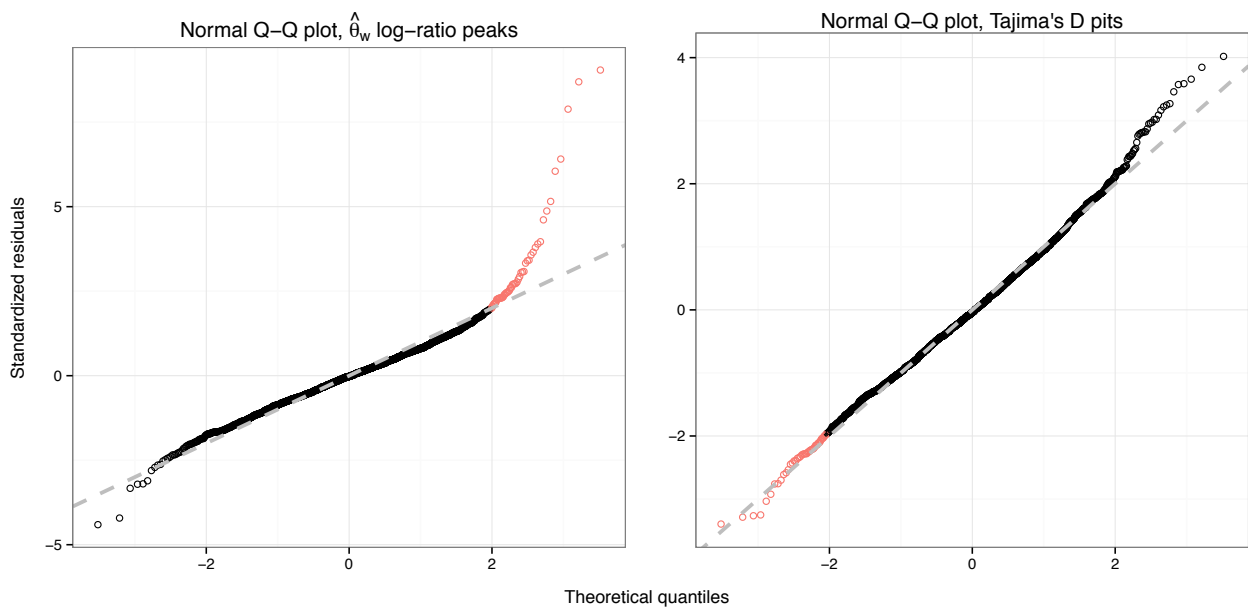

**Supplementary Figure S40. Q-Q plots for the normal approximation to the local average of the summary statistics ( $\hat{\theta}_w$  log-ratio and Tajima's D) in the comparison between pre-domestic horses and domesticated horses (excluding Icelandic (P5782))**

Comparison between the pre-domesticated horses, CGG10022, CGG10023, and the domestic horse breeds, Arabian, Icelandic, Norwegian Fjord, Standardbred, and Thoroughbred (Twilight). Outliers are defined using the upper or lower 5% predictive intervals for  $\hat{\theta}_w$  log-ratio and Tajima's D respectively and depicted in red.

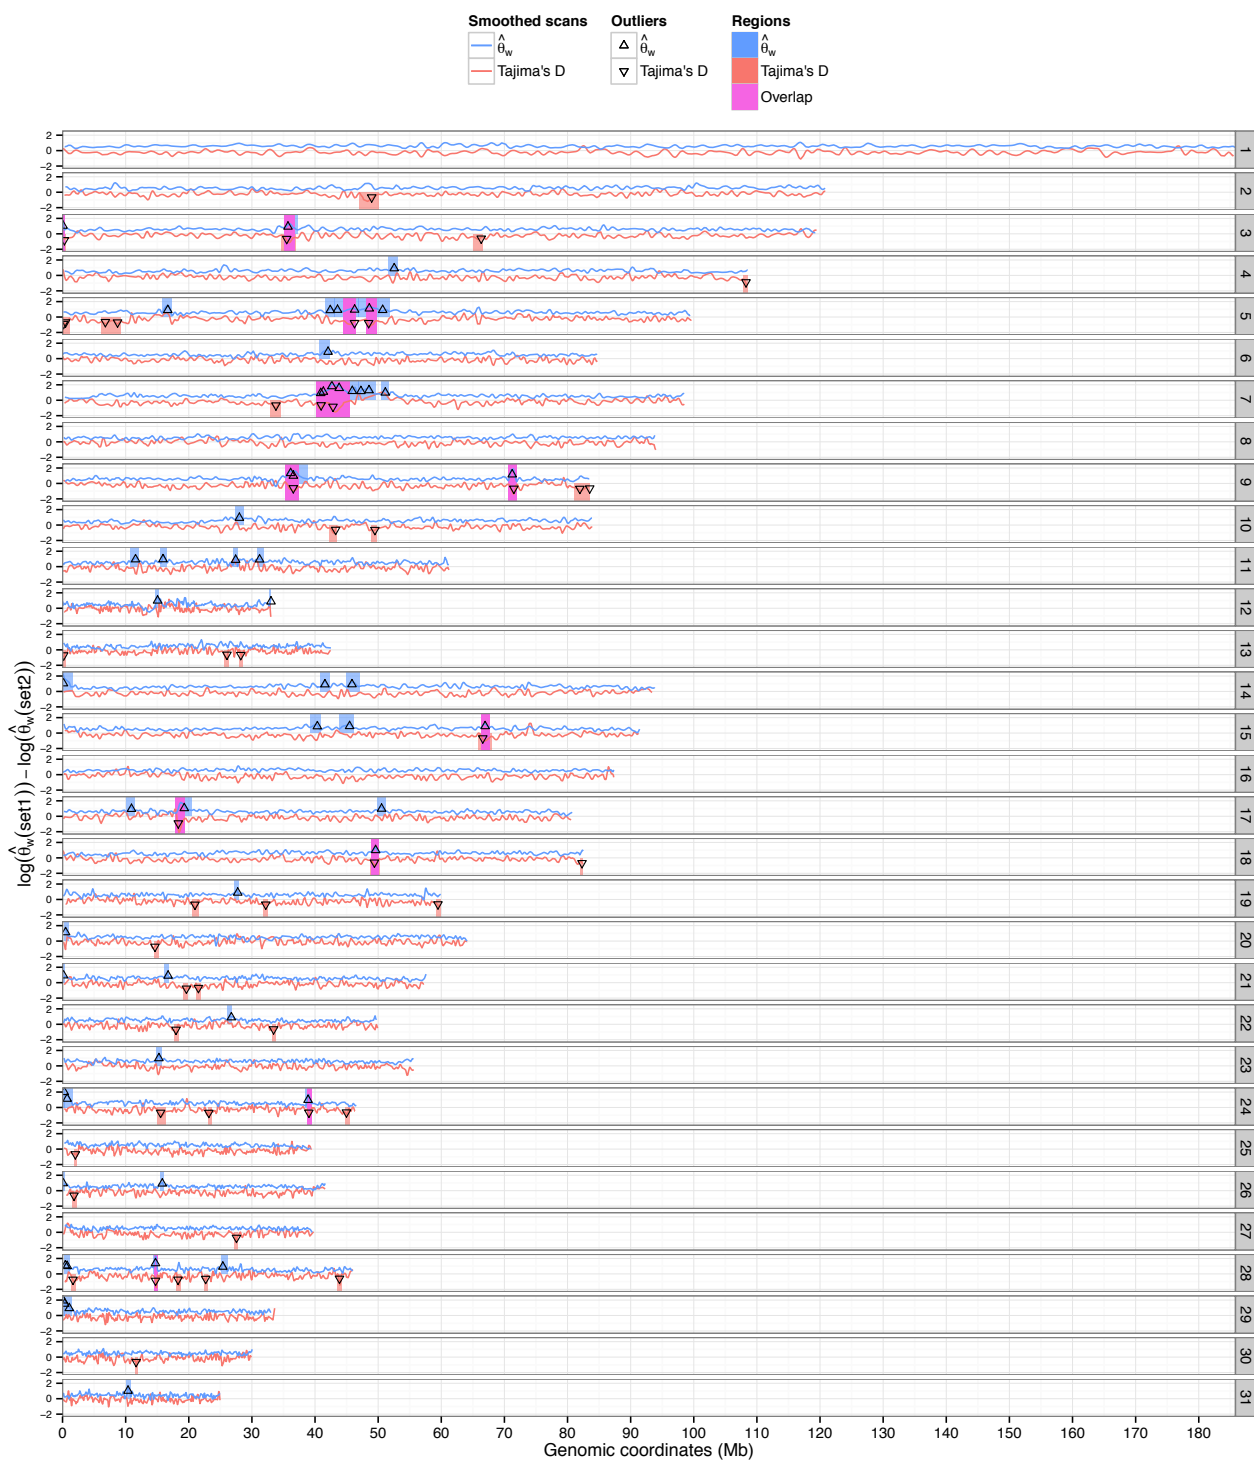

**Supplementary Figure S41. Screening for selective sweeps using the  $\hat{\theta}_w$  log-ratio between pre-domesticated horses (set1) and domestic horses (set) and Tajima's D values among domestic**

Autosomes are depicted. The cubic spline fitted to the  $\hat{\theta}_w$  log-ratio and Tajima's D values for all 50 kb sliding windows with a 10 kb step is reported by blue and red lines respectively. The outlier regions are depicted with rectangle and mean of the summary statistics within the outlier regions are presented with an arrow.

| Chromosome | Start             | End               | Peak              | y <sub>mean</sub> |
|------------|-------------------|-------------------|-------------------|-------------------|
| <b>3</b>   | <b>35,000</b>     | <b>375,000</b>    | <b>75,000</b>     | <b>1.047</b>      |
| <b>3</b>   | <b>35,115,000</b> | <b>37,265,000</b> | <b>35,715,000</b> | <b>0.922</b>      |
| 4          | 51,685,000        | 53,135,000        | 52,545,000        | 0.917             |
| 5          | 15,795,000        | 17,365,000        | 16,675,000        | 0.897             |
| 5          | 41,615,000        | 43,045,000        | 42,415,000        | 0.885             |
| 5          | 43,045,000        | 44,415,000        | 43,565,000        | 0.922             |
| <b>5</b>   | <b>44,415,000</b> | <b>46,845,000</b> | <b>46,275,000</b> | <b>0.948</b>      |
| <b>5</b>   | <b>46,845,000</b> | <b>50,555,000</b> | <b>48,595,000</b> | <b>1.100</b>      |
| 5          | 50,555,000        | 51,815,000        | 50,715,000        | 0.905             |
| 6          | 40,755,000        | 42,385,000        | 42,065,000        | 0.875             |
| <b>7</b>   | <b>40,165,000</b> | <b>41,065,000</b> | <b>40,905,000</b> | <b>0.920</b>      |
| <b>7</b>   | <b>41,065,000</b> | <b>41,905,000</b> | <b>41,315,000</b> | <b>1.086</b>      |
| <b>7</b>   | <b>41,905,000</b> | <b>43,165,000</b> | <b>42,665,000</b> | <b>1.811</b>      |
| <b>7</b>   | <b>43,165,000</b> | <b>45,445,000</b> | <b>43,825,000</b> | <b>1.576</b>      |
| 7          | 45,445,000        | 46,875,000        | 45,905,000        | 1.187             |
| 7          | 46,875,000        | 47,795,000        | 47,265,000        | 1.176             |
| 7          | 47,795,000        | 49,615,000        | 48,555,000        | 1.290             |
| 7          | 50,495,000        | 51,675,000        | 51,135,000        | 0.985             |
| <b>9</b>   | <b>35,315,000</b> | <b>36,465,000</b> | <b>36,135,000</b> | <b>1.332</b>      |
| <b>9</b>   | <b>36,465,000</b> | <b>38,875,000</b> | <b>36,565,000</b> | <b>0.991</b>      |
| <b>9</b>   | <b>70,565,000</b> | <b>71,965,000</b> | <b>71,235,000</b> | <b>1.160</b>      |
| 10         | 27,375,000        | 28,735,000        | 28,015,000        | 0.928             |
| 11         | 10,795,000        | 12,085,000        | 11,565,000        | 0.939             |
| 11         | 15,565,000        | 16,565,000        | 15,915,000        | 0.953             |
| 11         | 27,005,000        | 27,715,000        | 27,425,000        | 0.874             |
| 11         | 30,855,000        | 31,935,000        | 31,215,000        | 0.922             |
| 12         | 14,705,000        | 15,325,000        | 15,055,000        | 0.988             |
| 12         | 32,805,000        | 33,065,000        | 33,025,000        | 0.869             |
| 14         | 35,000            | 1,575,000         | 145,000           | 1.044             |
| 14         | 40,875,000        | 42,345,000        | 41,565,000        | 0.915             |
| 14         | 44,895,000        | 46,985,000        | 45,855,000        | 0.923             |
| 15         | 39,175,000        | 40,895,000        | 40,365,000        | 0.870             |
| 15         | 43,845,000        | 46,185,000        | 45,475,000        | 0.894             |
| <b>15</b>  | <b>66,255,000</b> | <b>67,615,000</b> | <b>66,945,000</b> | <b>0.885</b>      |
| 17         | 10,085,000        | 11,355,000        | 10,925,000        | 0.944             |
| <b>17</b>  | <b>17,885,000</b> | <b>20,435,000</b> | <b>19,285,000</b> | <b>1.042</b>      |
| 17         | 49,805,000        | 51,175,000        | 50,545,000        | 0.971             |
| <b>18</b>  | <b>48,885,000</b> | <b>50,135,000</b> | <b>49,595,000</b> | <b>0.997</b>      |
| 19         | 27,275,000        | 27,945,000        | 27,755,000        | 0.874             |
| 20         | 185,000           | 965,000           | 485,000           | 1.137             |
| 21         | 155,000           | 335,000           | 155,000           | 0.936             |
| 21         | 16,185,000        | 16,875,000        | 16,725,000        | 0.900             |
| 22         | 26,075,000        | 26,805,000        | 26,745,000        | 0.892             |
| 23         | 14,785,000        | 15,705,000        | 15,265,000        | 0.988             |
| 24         | 195,000           | 355,000           | 275,000           | 1.995             |
| 24         | 355,000           | 1,635,000         | 735,000           | 1.124             |
| <b>24</b>  | <b>38,525,000</b> | <b>39,485,000</b> | <b>38,895,000</b> | <b>0.970</b>      |
| 26         | 65,000            | 365,000           | 105,000           | 0.958             |

|           |                   |                   |                   |              |
|-----------|-------------------|-------------------|-------------------|--------------|
| 26        | 15,495,000        | 16,105,000        | 15,805,000        | 0.918        |
| 28        | 235,000           | 525,000           | 445,000           | 1.097        |
| 28        | 525,000           | 1,095,000         | 735,000           | 1.011        |
| <b>28</b> | <b>14,375,000</b> | <b>15,135,000</b> | <b>14,725,000</b> | <b>1.377</b> |
| 28        | 25,065,000        | 26,125,000        | 25,395,000        | 0.925        |
| 29        | 85,000            | 275,000           | 105,000           | 1.940        |
| 29        | 275,000           | 695,000           | 345,000           | 1.519        |
| 29        | 695,000           | 1,355,000         | 1,065,000         | 0.949        |
| 31        | 10,145,000        | 10,805,000        | 10,375,000        | 1.023        |

**Supplementary Table S31. Candidate genomic regions for selective sweeps, in the comparison between two pre-domesticated horses and five domestic horse breeds**

Start and end refers to the external coordinates for the regions defined by two valleys of the  $\hat{\theta}_w$  log-ratios cubic spline. The columns "Peak" and  $y_{mean}$  corresponds to the genome coordinate of the peak of the  $\hat{\theta}_w$  log-ratio and the local mean within the region respectively. Regions that also show a significantly decreased Tajima's D value are reported in bold.

| Chromosome | Start      | End        | $y_{mean}(\hat{\theta}_w)$ | $y_{mean(D)}$ |
|------------|------------|------------|----------------------------|---------------|
| 3          | 35,000     | 375,000    | 1.047                      | -0.806        |
| 3          | 35,115,000 | 36,855,000 | 0.922                      | -0.650        |
| 5          | 44,455,000 | 46,445,000 | 0.948                      | -0.770        |
| 5          | 48,035,000 | 49,765,000 | 1.100                      | -0.771        |
| 7          | 40,195,000 | 41,065,000 | 0.920                      | -0.641        |
| 7          | 41,065,000 | 41,905,000 | 1.086                      | -0.641        |
| 7          | 41,905,000 | 41,935,000 | 1.811                      | -0.641        |
| 7          | 41,935,000 | 43,165,000 | 1.811                      | -0.830        |
| 7          | 43,165,000 | 45,435,000 | 1.576                      | -0.830        |
| 9          | 35,315,000 | 36,465,000 | 1.332                      | -0.606        |
| 9          | 36,465,000 | 37,415,000 | 0.991                      | -0.606        |
| 9          | 70,585,000 | 71,965,000 | 1.160                      | -0.669        |
| 15         | 66,255,000 | 67,615,000 | 0.885                      | -0.673        |
| 17         | 17,885,000 | 19,405,000 | 1.042                      | -0.907        |
| 18         | 48,885,000 | 50,135,000 | 0.997                      | -0.601        |
| 24         | 38,765,000 | 39,485,000 | 0.970                      | -0.658        |
| 28         | 14,615,000 | 15,105,000 | 1.377                      | -0.879        |

**Supplementary Table S32. Intersection of genomic regions for selective sweeps defined by the overlap of between  $\hat{\theta}_w$  peaks and Tajima's D valleys, in the comparison between two pre-domesticated horses and five domestic horse breeds**

Candidate genomic regions were selected based on the presence of an increased  $\hat{\theta}_w$  log-ratios, overlapping a region with a decreased Tajima's D (Supplementary Table S31); these were truncated to just the region of overlap between the two measures.

### S4.2.3 Quality controls

The three analyses were performed using a window size of 50 kb with a step of 10 kb. Because of this, and due to moderate LD in horses (twice the  $r^2$  background at 100 – 150 kb (3)), the genomic regions analyzed are not independent. The autocorrelation of the summary statistics was reduced, without resorting to using large non-overlapping regions with the accompanying poor resolution, by using the mean of the summary statistics within regions defined by the local extremities. The lag correlation of the summary statistics with different offsets was calculated with the ‘acf’ function in R (26) and the results are shown in Supplementary Figure S42 for the pre-domesticated horses and the domestic horses, excluding Icelandic (P5782), for the same dataset including the Icelandic (P5782), and when using the Przewalski instead of the pre-domesticated horses.

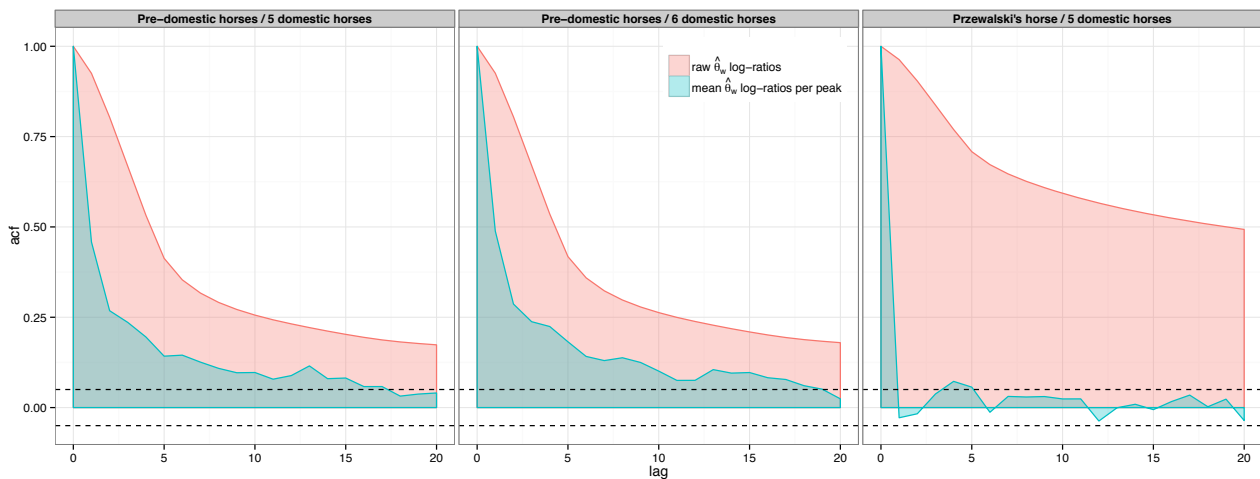

**Supplementary Figure S42. Autocorrelation plots of all  $\hat{\theta}_w$  log-ratios (left) and mean  $\hat{\theta}_w$  log-ratios retained per peak (right)**

**Left:** Auto-correlation for the pre-domesticated horses and the domestic horses, excluding the Icelandic (P5782); **Center:** for the pre-domesticated horses and all 6 domestic horses; **Right:** for Przewalski’s horse and the domestic horses, excluding Icelandic (P5782). Performed using the ‘acf’ function in R (26).; lag represents the distance in 10kbp windows between the each window, and the window with which it is compared; the stippled lines demarcate the region indicating +/- 0.05 Pearson-correlation coefficient.

### S4.2.4 Analysis II: Adding the Icelandic (P5782) genome to the set of domestic horse breeds

In the second analysis, we investigated the same parameters, the  $\hat{\theta}_w$  log-ratio and Tajima's D, but adding an additional domestic horse: Icelandic (P5782) (2). Following the same procedure as described in section S4.2.2, we selected outliers for both the  $\hat{\theta}_w$  log-ratios (Supplementary Figure S43, left panel) and Tajima's D values (Supplementary Figure S43, right panel) using a 5% threshold for predictive intervals. The resulting selection scans are depicted on Supplementary Figure S44.

We obtained 55 candidate regions using the 5% threshold for detecting  $\hat{\theta}_w$  log-ratio outliers to the upper predictive interval. 46 of these regions overlapped the 57 regions detected when excluding the Icelandic (P5782) in analysis I, accounting for 74.1% of the genomic regions in the first analysis. Out of the 55 candidate regions, 12 were confirmed by unusual low Tajima's D values, i.e., outliers to 5% of the lower predictive interval (Supplementary Table S33); the regions intersecting the two measures are reported in Supplementary Table S34. The 12 truncated regions overlap 9 of the 16



truncated regions detected in the first analysis (see above), accounting for 47.0% of the genomic regions in the previous set. Notably, these 9 overlapping regions include both of the genes described previously (*MC1R* and *KITLG*).

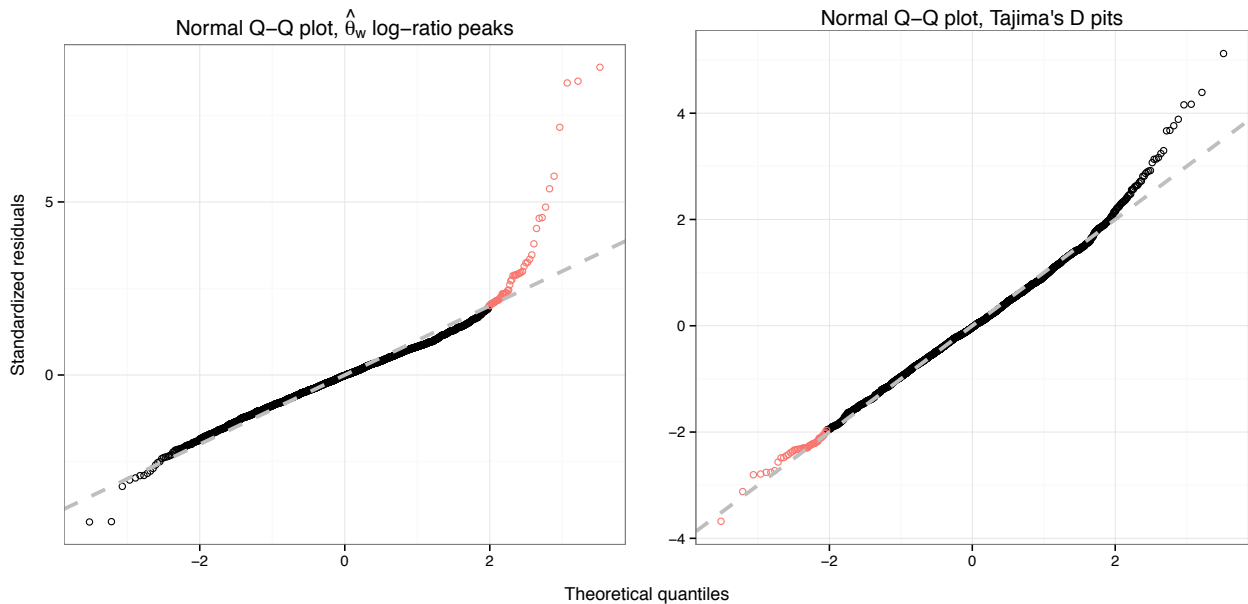

**Supplementary Figure S43. Q-Q plots for the normal approximation to the local average of the summary statistics ( $\hat{\theta}_w$  log-ratio and Tajima's D) in the comparison between pre-domesticated horses and the domestic horses**

Comparison between the pre-domesticated horses, CGG10022, CGG10023, and the domestic horse breeds, Arabian, Icelandic, Norwegian Fjord, Standardbred, Thoroughbred (Twilight), and the Icelandic (P5782). Outliers are defined using the upper or lower 5% predictive intervals for  $\hat{\theta}_w$  log-ratio and Tajima's D respectively and depicted in red.

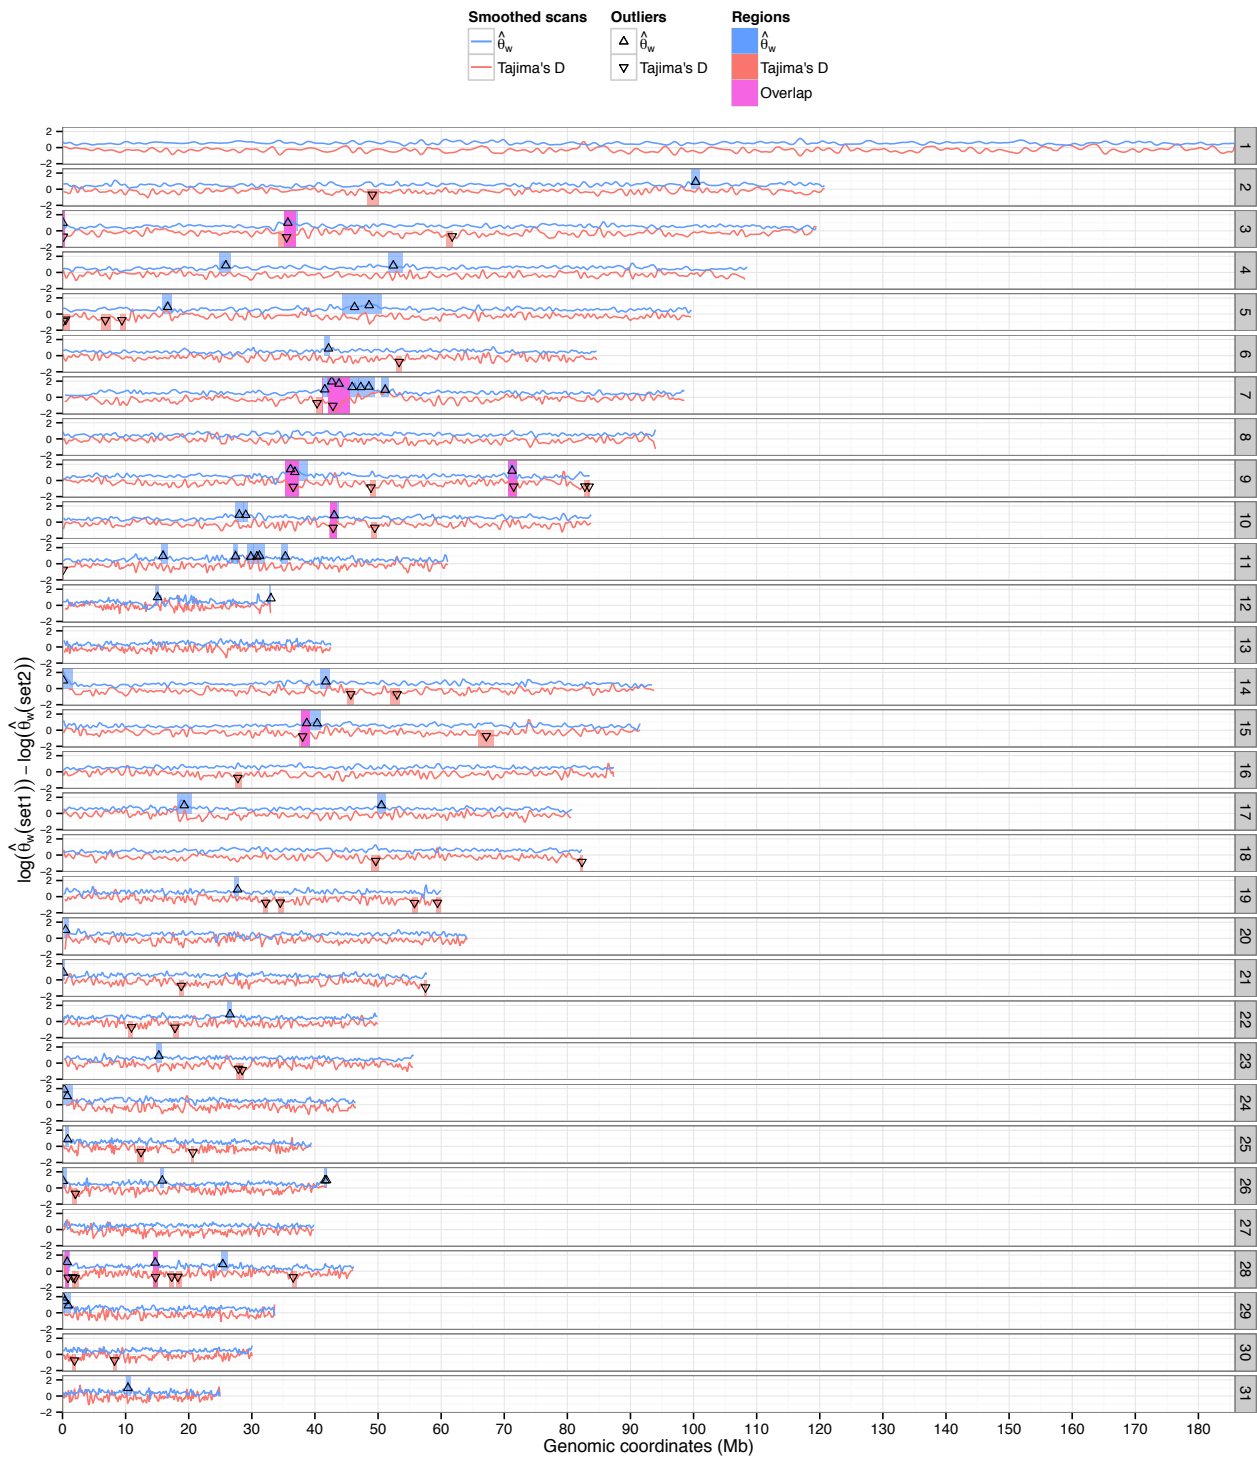

**Supplementary Figure S44. Screening for selective sweeps using the  $\hat{\theta}_w$  log-ratio between pre-domesticated (set1) and domestic horses (set2) including Icelandic (P5782), 5% significant threshold**

The smooth spline that fits the  $\hat{\theta}_w$  log-ratio and Tajima's D values for all 50 kb sliding windows with a 10 kb step is reported using blue and red lines respectively. The outlier regions are depicted with rectangles and the mean of the summary statistics within the outlier regions are presented with an arrow.

| Chromosome | Start             | End               | Peak              | y <sub>mean</sub> |
|------------|-------------------|-------------------|-------------------|-------------------|
| 2          | 99,725,000        | 101,015,000       | 100,335,000       | 0.907             |
| <b>3</b>   | <b>35,000</b>     | <b>375,000</b>    | <b>75,000</b>     | <b>0.992</b>      |
| <b>3</b>   | <b>35,115,000</b> | <b>37,265,000</b> | <b>35,715,000</b> | <b>0.994</b>      |
| 4          | 24,855,000        | 26,725,000        | 25,885,000        | 0.864             |
| 4          | 51,565,000        | 53,905,000        | 52,425,000        | 0.852             |
| 5          | 15,795,000        | 17,365,000        | 16,675,000        | 0.872             |
| 5          | 44,325,000        | 46,805,000        | 46,275,000        | 0.861             |
| 5          | 46,805,000        | 50,495,000        | 48,595,000        | 1.086             |
| 6          | 41,525,000        | 42,395,000        | 42,155,000        | 0.877             |
| <b>7</b>   | <b>41,105,000</b> | <b>41,945,000</b> | <b>41,555,000</b> | <b>0.972</b>      |
| <b>7</b>   | <b>41,945,000</b> | <b>43,135,000</b> | <b>42,665,000</b> | <b>1.952</b>      |
| <b>7</b>   | <b>43,135,000</b> | <b>45,455,000</b> | <b>43,825,000</b> | <b>1.675</b>      |
| 7          | 45,455,000        | 46,885,000        | 45,905,000        | 1.258             |
| 7          | 46,885,000        | 47,805,000        | 47,265,000        | 1.255             |
| 7          | 47,805,000        | 49,485,000        | 48,555,000        | 1.307             |
| 7          | 50,545,000        | 51,675,000        | 51,135,000        | 0.921             |
| <b>9</b>   | <b>35,315,000</b> | <b>36,475,000</b> | <b>36,135,000</b> | <b>1.391</b>      |
| <b>9</b>   | <b>36,475,000</b> | <b>38,895,000</b> | <b>36,815,000</b> | <b>1.049</b>      |
| <b>9</b>   | <b>70,555,000</b> | <b>71,965,000</b> | <b>71,235,000</b> | <b>1.208</b>      |
| 10         | 27,355,000        | 28,695,000        | 28,015,000        | 0.911             |
| 10         | 28,695,000        | 29,415,000        | 29,035,000        | 0.882             |
| <b>10</b>  | <b>42,405,000</b> | <b>43,725,000</b> | <b>43,055,000</b> | <b>0.848</b>      |
| 11         | 15,605,000        | 16,565,000        | 15,925,000        | 0.967             |
| 11         | 26,995,000        | 27,715,000        | 27,425,000        | 0.907             |
| 11         | 29,325,000        | 30,315,000        | 29,845,000        | 0.869             |
| 11         | 30,315,000        | 30,825,000        | 30,805,000        | 0.876             |
| 11         | 30,825,000        | 31,955,000        | 31,215,000        | 0.990             |
| 11         | 34,635,000        | 35,655,000        | 35,315,000        | 0.896             |
| 12         | 14,715,000        | 15,335,000        | 15,055,000        | 1.005             |
| 12         | 32,765,000        | 33,065,000        | 33,025,000        | 0.856             |
| 14         | 35,000            | 1,575,000         | 145,000           | 0.999             |
| 14         | 40,835,000        | 42,325,000        | 41,735,000        | 0.875             |
| <b>15</b>  | <b>37,735,000</b> | <b>39,145,000</b> | <b>38,705,000</b> | <b>0.866</b>      |
| 15         | 39,145,000        | 40,885,000        | 40,355,000        | 0.851             |
| 17         | 18,105,000        | 20,475,000        | 19,285,000        | 1.001             |
| 17         | 49,815,000        | 51,145,000        | 50,545,000        | 1.010             |
| 19         | 27,275,000        | 27,975,000        | 27,755,000        | 0.885             |
| 20         | 185,000           | 965,000           | 485,000           | 1.033             |
| 21         | 155,000           | 355,000           | 155,000           | 0.891             |
| 22         | 26,065,000        | 26,835,000        | 26,535,000        | 0.878             |
| 23         | 14,805,000        | 15,735,000        | 15,265,000        | 0.912             |
| 24         | 195,000           | 385,000           | 275,000           | 1.880             |
| 24         | 385,000           | 1,605,000         | 755,000           | 1.066             |
| 25         | 495,000           | 1,055,000         | 815,000           | 0.866             |
| 26         | 55,000            | 605,000           | 105,000           | 0.860             |
| 26         | 15,515,000        | 16,125,000        | 15,805,000        | 0.906             |
| 26         | 41,425,000        | 41,785,000        | 41,595,000        | 0.923             |
| 26         | 41,785,000        | 41,835,000        | 41,835,000        | 0.948             |
| <b>28</b>  | <b>235,000</b>    | <b>1,095,000</b>  | <b>735,000</b>    | <b>1.137</b>      |
| <b>28</b>  | <b>14,385,000</b> | <b>15,155,000</b> | <b>14,685,000</b> | <b>1.051</b>      |
| 28         | 25,085,000        | 26,175,000        | 25,395,000        | 0.863             |
| 29         | 85,000            | 275,000           | 105,000           | 1.888             |

|    |            |            |            |       |
|----|------------|------------|------------|-------|
| 29 | 275,000    | 705,000    | 345,000    | 1.450 |
| 29 | 705,000    | 1,335,000  | 925,000    | 0.907 |
| 31 | 10,145,000 | 10,805,000 | 10,375,000 | 0.993 |

**Supplementary Table S33. Genomic regions candidate for selective sweeps, in the comparison between 2 pre-domesticated horses and 6 domestic horse breeds**

Start and end refers to the external coordinates for the regions defined by two valleys of the  $\hat{\theta}_w$  log-ratios cubic spline. The columns "Peak" and  $y_{mean}$  corresponds to the genome coordinate of the peak of the  $\hat{\theta}_w$  log-ratio and the local mean within the region, respectively. Regions that also show a significantly decreased Tajima's D value are reported in bold.

| Chromosome | Start      | End        | $y_{mean}(\hat{\theta}_w)$ | $y_{mean}(D)$ |
|------------|------------|------------|----------------------------|---------------|
| 3          | 35,000     | 345,000    | 0.992                      | -0.712        |
| 3          | 35,115,000 | 36,905,000 | 0.994                      | -0.781        |
| 7          | 41,105,000 | 41,185,000 | 0.972                      | -0.715        |
| 7          | 42,125,000 | 43,135,000 | 1.952                      | -1.045        |
| 7          | 43,135,000 | 45,455,000 | 1.675                      | -1.045        |
| 7          | 45,455,000 | 45,455,000 | 1.258                      | -1.045        |
| 9          | 35,315,000 | 36,475,000 | 1.391                      | -0.773        |
| 9          | 36,475,000 | 37,415,000 | 1.049                      | -0.773        |
| 9          | 70,655,000 | 71,965,000 | 1.208                      | -0.740        |
| 10         | 42,405,000 | 43,505,000 | 0.848                      | -0.688        |
| 15         | 37,735,000 | 39,125,000 | 0.866                      | -0.756        |
| 28         | 525,000    | 1,015,000  | 1.137                      | -0.799        |
| 28         | 14,405,000 | 15,115,000 | 1.051                      | -0.721        |

**Supplementary Table S34. Truncated genomic regions for selective sweeps delimited by  $\hat{\theta}_w$  valleys and Tajima's D peaks, in the comparison between 2 pre-domesticated horses and 6 domestic horse breeds**

Candidate genomic regions were selected based on the presence of an increased the  $\hat{\theta}_w$  log-ratios, overlapping a region with a decreased Tajima's D (Supplementary Table S33); these were truncated to just the region of overlap between the two measures.

#### S4.2.5 Analysis III: Comparing the Przewalski's horse to domestic horse breeds

The Przewalski's horse sequenced in Orlando *et al.* 2013 (1) did not show significant levels of admixture with any of the four investigated domestic horse breeds: Arabian, Icelandic, Norwegian Fjord, and Standardbred. The study also estimated that the Przewalski's horse population and the population that led to modern domestic lineages diverged 38-72 kyr BP, i.e. much earlier than the earliest known evidence of horse domestication (5.5 kyr BP) (5). We therefore compared the  $\hat{\theta}_w$  between the Przewalski horse and the domestic horses (excluding the Icelandic (P5782)) in order to detect selection that differentiated both populations, possibly in relation – but not exclusively – with domestication.

As a single individual represents the Przewalski's horse in this study, the  $\hat{\theta}_w$  equals the heterozygosity. As consequence, homozygous regions in the genome of this individual will bias the  $\hat{\theta}_w$  log-ratio, preventing the direct detection of outliers using the methodology described in section S4.2.2. To resolve this issue, we used a running median on 151 windows (1.55 Mbp). This number of windows was determined empirically to offer a reasonable tradeoff between over-smoothing and insufficient smoothing. The difference between the polynomial smooth-lines with and without the running median was subtracted from the  $\hat{\theta}_w$  log-ratios. Following correction, genomic regions were determined as described in section S4.2.2. The corrected regions and log-ratios are henceforth referred to as "adjusted". Resulting selection scans are displayed on Supplementary Figure S46, with the uncorrected  $\hat{\theta}_w$  log-ratios shown in green, and adjusted  $\hat{\theta}_w$  log-ratios shown in blue. The effect of running median correction could be assessed on the normal qqplots of  $\hat{\theta}_w$  log-ratios (Supplementary Figure S45).

This resulted in 34 candidate regions, overlapping 6 of the regions detected using the pre-domesticated horses (Analysis I), and covering 8.1% of the genomic regions detected for that test; similarly five of the regions detected for the present analysis overlapped the regions detected in analysis II, accounting for 7.5% of the genomic regions.

Of out of the 34 candidate regions detected using  $\hat{\theta}_w$  log-ratio outliers to the upper predictive interval, five were characterized by low Tajima's D values, i.e., outliers to 5% of the lower predictive interval (Supplementary Table S35). The regions intersecting the two measures are reported in Supplementary Table S36. These five regions intersected with three of the 16 regions detected using the five domestic horses and the pre-domesticated horses (Analysis I), accounting for 14.9% of the genomic regions detected for that analysis (I). Notably, these three overlapping regions include one of the genes described previously (*KITLG*), but not the other (*MC1R*).

The sensitivity of this third analysis was lower due to the fact that  $\hat{\theta}_w$  values for the Przewalski's horse were obtained using only one individual, and due to the fact that smoothing of  $\hat{\theta}_w$  log-ratios was performed globally, and hence also smoothed out genuine outliers, which reduces our ability to detect peaks of medium intensities. As adding an additional domestic horse decreased our ability to detect regions undergoing selective sweeps (Supplementary Section S4.2.4), we did not perform the comparison of the Przewalski's horse with the domestic horses including the Icelandic (P5782).

#### S4.2.6 Detecting outlier genes in smaller regions

Smoothing the raw  $\hat{\theta}_w$  log-ratios for all sliding windows to delimit regions prevent us from detecting peaks in smaller regions, and any gene found in such regions. In order to facilitate testing of all genes, we used an alternative method, in which each gene annotated in Ensembl v72 (80) was assigned the  $\hat{\theta}_w$  log-ratio of the closest 50 kb sliding window. This was achieved by finding the window for which the distance between the center-point of the window, and the center point of the gene was minimized. The genes were ranked by the  $\hat{\theta}_w$  log-ratio of the closet window and the top 1% or 5% were used as outliers. The procedure was applied to the three analyses performed earlier.

Notably, both *KITLG* and *MC1R* are ranked in the top 1% of results in the comparisons, with the exception of *MC1R* in the comparison between the domestic horses and the Przewalski's horse (analysis III, Supplementary Section S4.2.5).

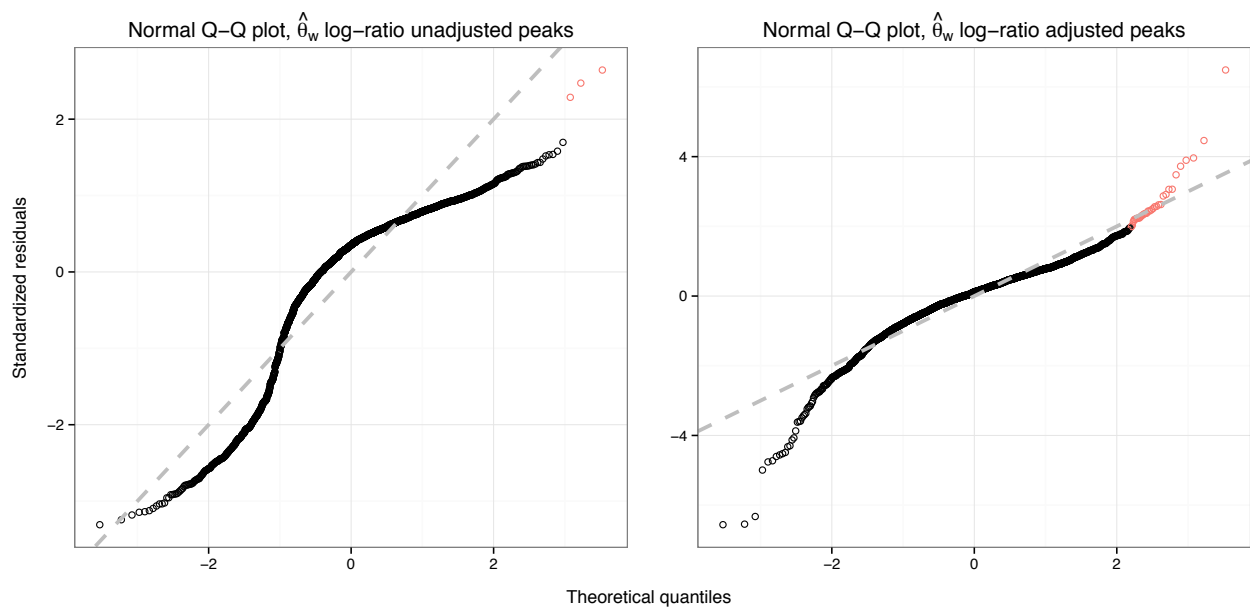

**Supplementary Figure S45. Q-Q plots for the normal approximation to the local average of the summary statistics ( $\hat{\theta}_w$  log-ratio and Tajima's D) in the comparison between Przewalski's horse and domestic horses (excluding Icelandic (P5782))**

Comparison between the Przewalski's horse, and the domestic horse breeds, Arabian, Icelandic, Norwegian Fjord, Standardbred, and Thoroughbred (Twilight). Outliers are defined using the upper or lower 5% predictive intervals for  $\hat{\theta}_w$  log-ratio and Tajima's D respectively and depicted in red.

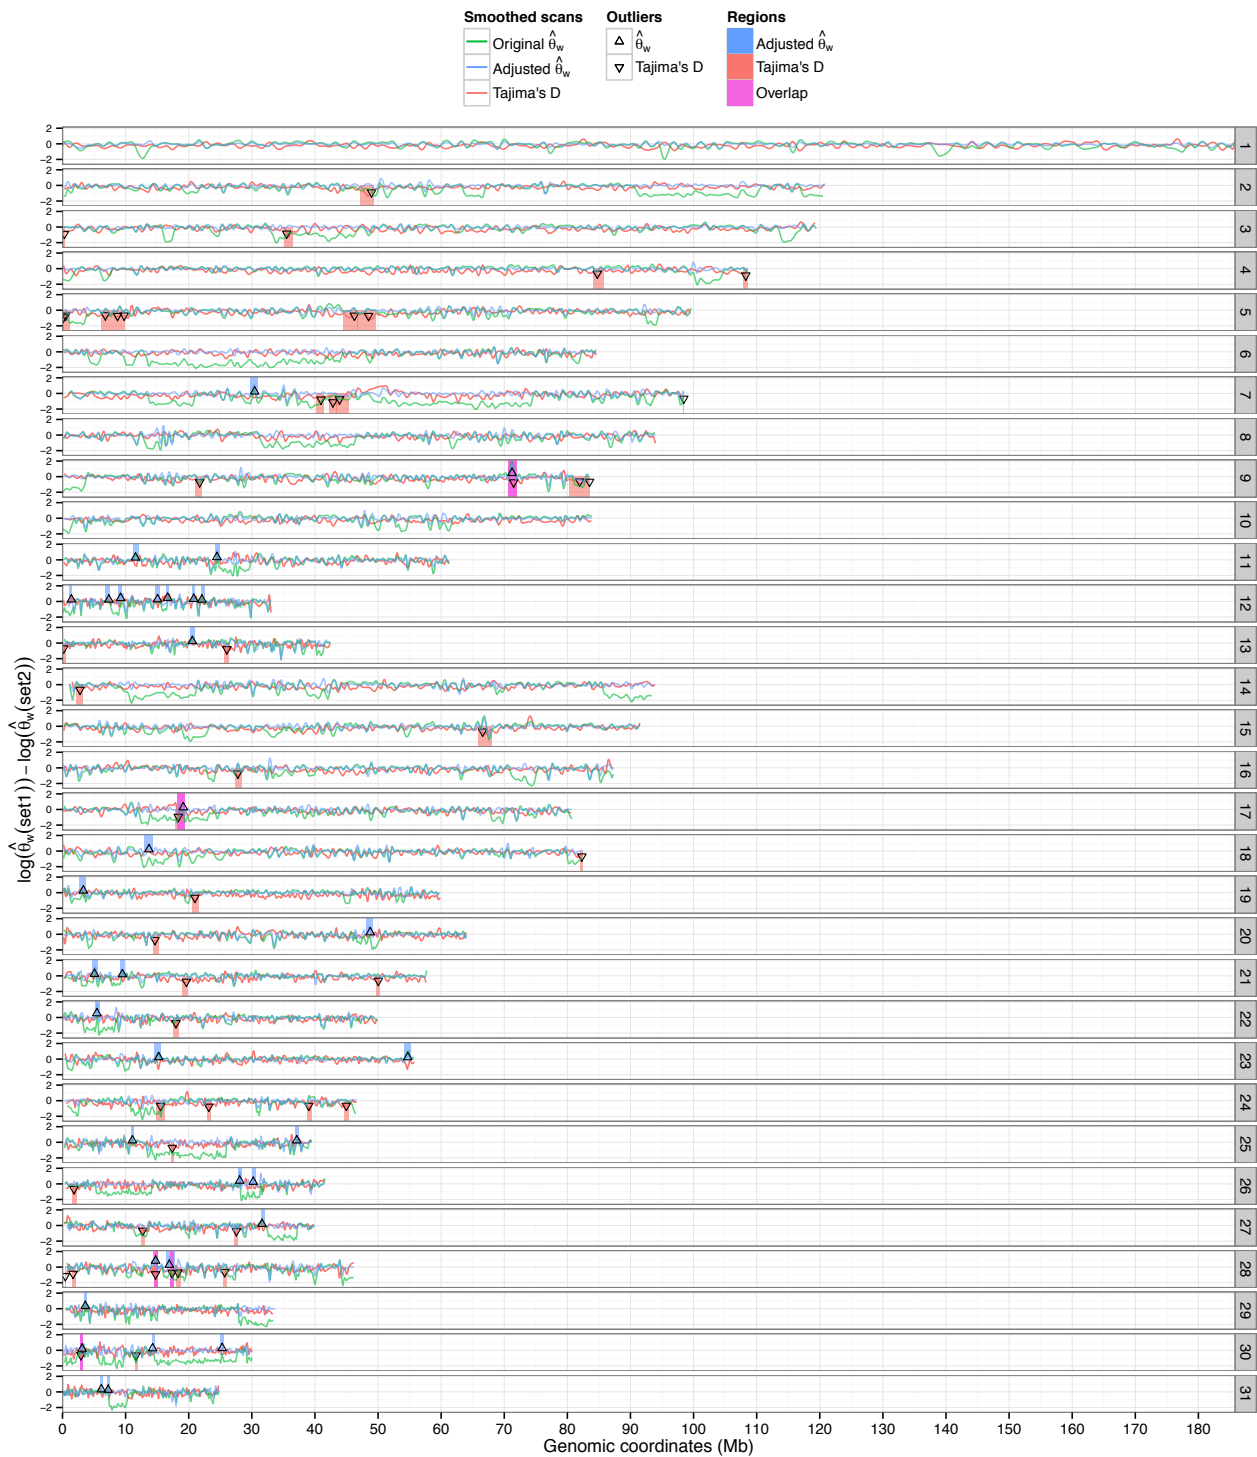

**Supplementary Figure S46. Screening for selective sweeps using  $\hat{\theta}_w$  log-ratio between the Przewalski's horse and domestic horses, 5% significant threshold**

All autosomes are depicted. The smooth polynomial model that fits the  $\hat{\theta}_w$  log-ratio and Tajima's D values for all 50 kb sliding windows with a 10 kb step is reported using blue and red lines respectively.  $\hat{\theta}_w$  log-ratios were corrected for low-heterozygosity regions specific to the Przewalski's horse genome using a running median approach (Supplementary Section S4.2.5).

The outlier regions are depicted with rectangle and mean of the summary statistics within the outlier regions are presented with an arrow.

| Chromosome | Start             | End               | Peak              | $y_{\text{mean}}$ |
|------------|-------------------|-------------------|-------------------|-------------------|
| 7          | 29,785,000        | 31,045,000        | 30,455,000        | 0.232             |
| <b>9</b>   | <b>70,625,000</b> | <b>71,935,000</b> | <b>71,235,000</b> | <b>0.465</b>      |
| 11         | 11,215,000        | 12,105,000        | 11,565,000        | 0.283             |
| 11         | 24,205,000        | 24,865,000        | 24,465,000        | 0.344             |
| 12         | 1,125,000         | 1,455,000         | 1,405,000         | 0.250             |
| 12         | 6,855,000         | 7,505,000         | 7,345,000         | 0.226             |
| 12         | 8,835,000         | 9,315,000         | 9,205,000         | 0.433             |
| 12         | 14,705,000        | 15,405,000        | 15,065,000        | 0.276             |
| 12         | 16,405,000        | 16,845,000        | 16,665,000        | 0.456             |
| 12         | 20,625,000        | 20,975,000        | 20,795,000        | 0.318             |
| 12         | 21,975,000        | 22,495,000        | 22,085,000        | 0.227             |
| 13         | 20,285,000        | 20,945,000        | 20,585,000        | 0.244             |
| <b>17</b>  | <b>18,215,000</b> | <b>19,435,000</b> | <b>19,135,000</b> | <b>0.269</b>      |
| 18         | 12,895,000        | 14,315,000        | 13,695,000        | 0.219             |
| 19         | 2,745,000         | 3,715,000         | 3,305,000         | 0.264             |
| 20         | 48,165,000        | 49,135,000        | 48,765,000        | 0.240             |
| 21         | 4,735,000         | 5,615,000         | 5,065,000         | 0.247             |
| 21         | 9,075,000         | 9,845,000         | 9,485,000         | 0.204             |
| 22         | 5,175,000         | 5,815,000         | 5,445,000         | 0.532             |
| 23         | 14,645,000        | 15,615,000        | 15,255,000        | 0.232             |
| 23         | 54,175,000        | 55,255,000        | 54,705,000        | 0.230             |
| 25         | 10,875,000        | 11,305,000        | 11,075,000        | 0.236             |
| 25         | 36,965,000        | 37,495,000        | 37,125,000        | 0.231             |
| 26         | 27,845,000        | 28,325,000        | 28,075,000        | 0.400             |
| 26         | 30,045,000        | 30,525,000        | 30,225,000        | 0.259             |
| 27         | 31,445,000        | 32,045,000        | 31,615,000        | 0.197             |
| <b>28</b>  | <b>14,395,000</b> | <b>15,095,000</b> | <b>14,745,000</b> | <b>0.806</b>      |
| <b>28</b>  | <b>16,535,000</b> | <b>17,805,000</b> | <b>16,915,000</b> | <b>0.284</b>      |
| 29         | 3,405,000         | 3,815,000         | 3,615,000         | 0.343             |
| <b>30</b>  | <b>2,815,000</b>  | <b>3,135,000</b>  | <b>3,105,000</b>  | <b>0.199</b>      |
| 30         | 14,285,000        | 14,675,000        | 14,285,000        | 0.251             |
| 30         | 25,045,000        | 25,595,000        | 25,295,000        | 0.277             |
| 31         | 6,005,000         | 6,335,000         | 6,155,000         | 0.323             |
| 31         | 7,115,000         | 7,455,000         | 7,235,000         | 0.259             |

**Supplementary Table S35. Genomic regions candidate for selective sweeps, in the comparison between the Przewalski's horse and 5 domestic horse breeds**

Start and end refers to the external coordinates for the regions defined by two valleys of the  $\hat{\theta}_w$  log-ratios cubic spline. The columns "Peak" and  $y_{\text{mean}}$  corresponds to the genome coordinate of the peak of the  $\hat{\theta}_w$  log-ratio and the local mean within the region respectively. Regions that also show a significantly decreased Tajima's D value are reported in bold.

| Chromosome | Start      | End        | $y_{\text{mean}}(\hat{\theta}_w)$ | $y_{\text{mean(D)}}$ |
|------------|------------|------------|-----------------------------------|----------------------|
| <b>9</b>   | 70,625,000 | 71,935,000 | 0.465                             | -0.719               |
| <b>17</b>  | 18,215,000 | 19,435,000 | 0.269                             | -0.935               |



|           |            |            |       |        |
|-----------|------------|------------|-------|--------|
| <b>28</b> | 14,595,000 | 15,075,000 | 0.806 | -0.904 |
| <b>28</b> | 16,985,000 | 17,555,000 | 0.284 | -0.737 |
| <b>30</b> | 2,815,000  | 3,135,000  | 0.199 | -0.616 |

**Supplementary Table S36. Truncated genomic regions for selective sweeps delimited by  $\hat{\theta}_w$  valleys and Tajima's D peaks, in the comparison between the Przewalski's horse and 5 domestic horse breeds**

Candidate genomic regions were selected based on the presence of an increased the  $\hat{\theta}_w$  log-ratios, overlapping a region with a decreased Tajima's D (Supplementary Table S35); these were truncated to just the region of overlap between the two measures.

### S4.3 Selective sweep scan with coalescent and SNP BeadChip genotypes

#### S4.3.1 Background

To search for signatures of selection in the horse genomes, putatively affected by early domestication, we modified an approach developed by Green et al. (2010) and used to identify signatures of selective sweeps in the early stage of human evolution, using Neanderthal and modern human genomes [see their Supplementary Section SOM13] (24). This approach examines the timing of coalescence of domestic and pre-domesticated alleles at each locus. If strong artificial selection targeted a specific region in the early stages of domestication, alleles of domestic horses should coalesce within the domestic clade more recently than the coalescence of ancient alleles, locating the pre-domesticated horses basal to the domesticated horses, and resulting in what we term the 'external' topology (illustrated in Supplementary Figure S47A). Importantly, the ancient horse genome will contain substantially reduced numbers of derived alleles (polarized relative to the outgroup) in regions under selection, and the lengths of these regions will be positively correlated with strengths of selection. Alternatively, if genomic regions are evolving neutrally, ancient and domestic alleles may be sorted incompletely, potentially resulting in what we term the 'internal' topology (Supplementary Figure S47B). For neutral loci, derived allele frequencies in domestic horses should be positively correlated with those in ancient horses, while genomic regions that exhibit continuous distributions of 'external' states are likely to be affected by domestication. To find these external regions, we fit a parametric normal distribution to the genome-wide differences between observed and expected derived allele frequencies in ancient horses, and seek outliers of this distribution.

We made use of the publicly available genotypes of more than 400 horses of 32 modern breeds at 54,602 SNP loci, genotyped with the Illumina EquineSNP50 Genotyping BeadChip (38, 39), from the NAGRP Community Data Repository for Livestock Animal Genomics. We also used whole genome shotgun sequences of the samples described in Supplementary Section S1.1, excluding the Przewalski's horse, and using the domestic donkey (Willy) as the outgroup.

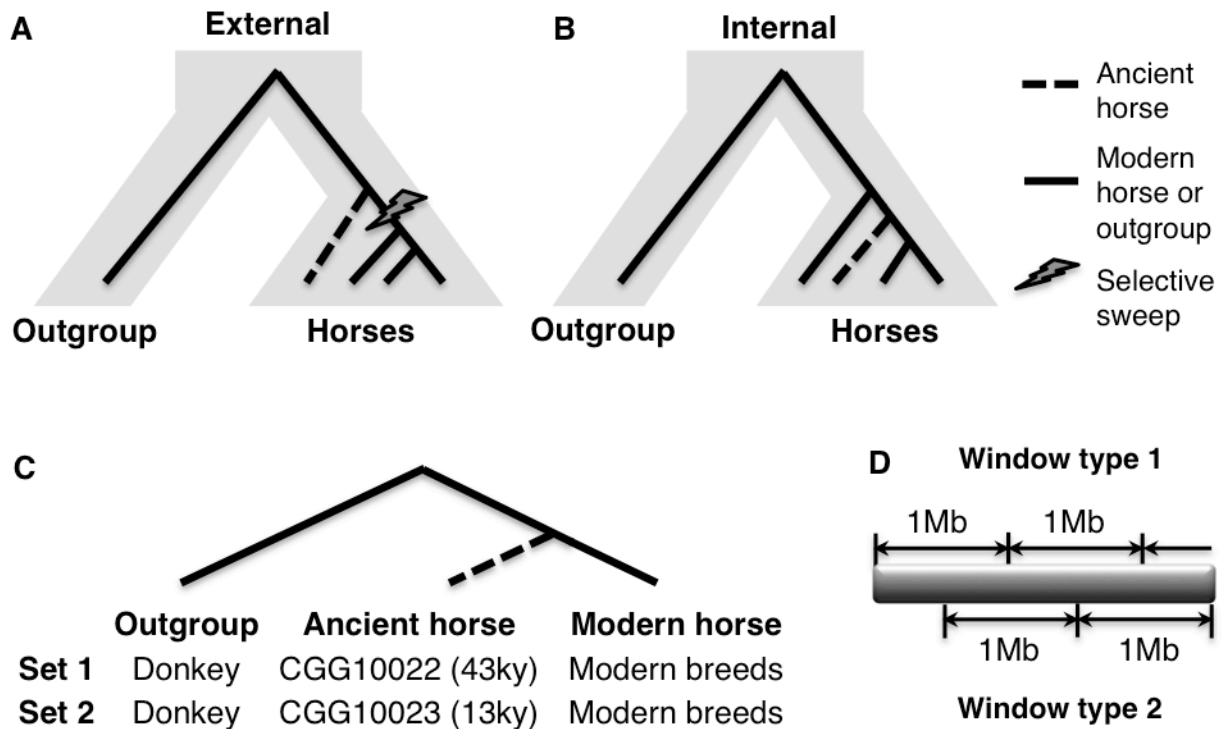

**Supplementary Figure S47. Study design of the selective sweep scans with SNP Beadchip array data**

(A-B) Coalescence of ancient and modern horses based on (A) alleles affected by selective sweeps after divergence of the pre-domestication breed and (B) neutral alleles. Dashed lines represent ancient horses and the grey area represents the two lineages of outgroup species and horses. (C) Two sets of selective sweep scans that are composed of different combinations of ancient horse individuals (CGG10022 and CGG10023) and all 32 modern breeds. (D) Illustration of the two types of 1 Mb windows used in selection scans for a stretch of chromosome; type 2 windows are produced by shifting the coordinates of type 1 windows by 500kb.

### S4.3.2 Data processing and model training

We ‘haploidized’ whole genome shotgun sequencing data of pre-domesticated horses (CGG10022 and CGG10023) and the outgroup with the program ‘*pu2fa*’ developed by Green *et al.* (24). This program picks one random allele at each site that passes a set of quality filter and consequentially transforms a diploid genome into a haploid genome. We extracted bases at the 54,602 positions included in the SNP array from the resulting haploid genomes. We then selected SNPs that were biallelic and autosomal, and polarized them by designating the allele in outgroups as ancestral. To minimize the interference of ancient DNA damage on the final results, which manifests mainly as C→T/G→A transitions (118), we divided SNPs into different transitions/transversion categories and modeled them individually. We estimated the conditional probability of derived alleles in ancient horses  $P(\text{ancient derived}|\text{modern derived})$  empirically by estimating the proportion of loci in each frequency bin of domestic horses that also possess derived alleles in ancient horses for each category of SNPs (Supplementary Figure S48).

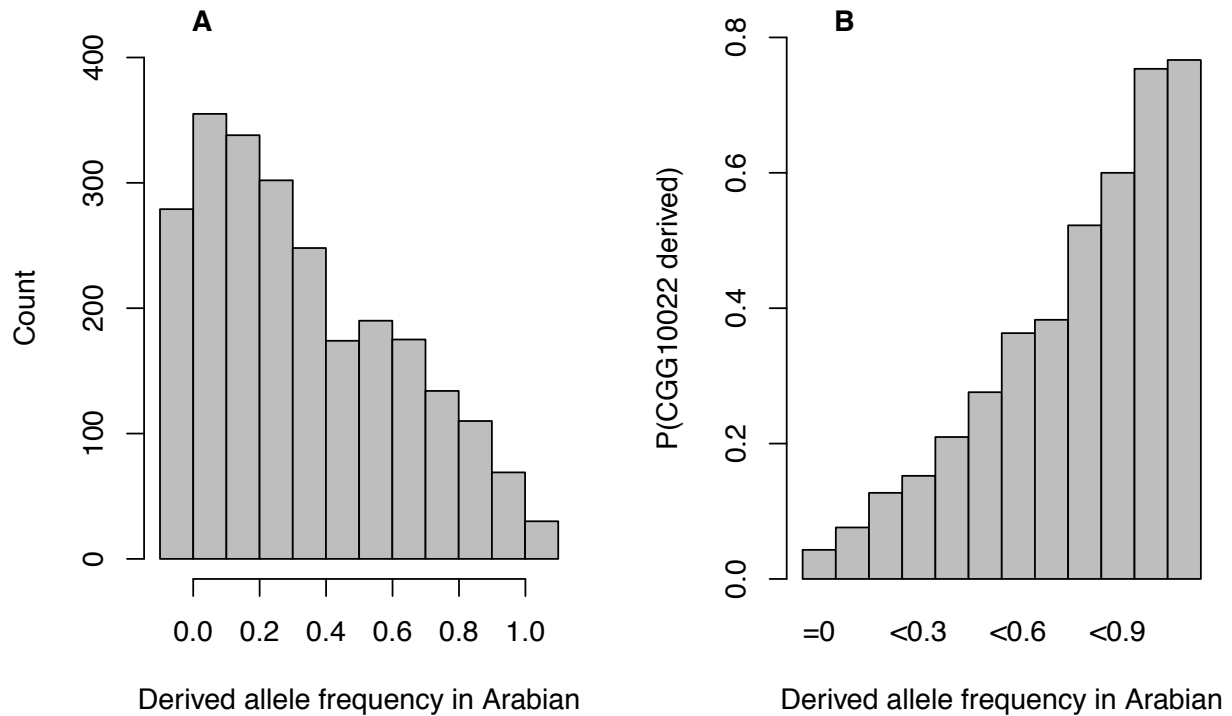

### Supplementary Figure S48. Model training

**A:** Derived allele frequency spectrum of the modern breed. We use an example of the Arabian breed at SNP loci with A→G transitions. **B:** Probabilities of derived alleles of the ancient horse conditioning on the derived allele frequencies in modern breeds. We use the sample combination of the Domestic donkey (Willy), CGG10022 and Arabian horse at the A→G SNP transition type as an example.

#### S4.3.3 Selection scan setup

We divided the horse genome into non-overlapping windows of 1 Mb (this set of windows constitutes what we call hereafter type 1 windows; Supplementary Figure S47D), which include, on average, 23 SNPs. We estimated differences ( $D_i$ ) between observed frequency of derived alleles ( $o_i$ ) and the expected frequency of derived alleles in the ancient horse  $E(P(\text{ancient derived}))_i$  under no selection with the following equations:

For  $n$  numbers of SNP loci in window  $i$  of 1 Mb:

$$D_i = o_i - E(P(\text{ancient derived}))_i, \text{ in which}$$

$$o_i = \sum_{k=1}^n \text{Bernoulli}(\text{ancient derived}),$$

$$E(P(\text{ancient derived}))_i = \sum_{k=1}^n P_k(\text{ancient derived}),$$

and  $P_k(\text{ancient derived})$  at each site was estimated from the respective empirical distribution of the transition/transversion type as illustrated in Supplementary Figure S48b.

Finally, we z-transformed all  $D_i$ , quantified the importance of every region by their z-scores, and designated the top 1% of regions (with z-scores less than -2.325) as candidate regions. We performed selective sweep scans on two sets of data; each scan includes combination of one ancient horse and one modern breed (e.g. a scan of the Domestic Donkey (Willy), CGG10022, Akhal Teke) (Supplementary Figure S47C). We repeated the two sets of analyses by moving each window by 500kb to accommodate any signature of selective sweeps that intercepts with two neighboring windows (this set of windows constitutes type 2 windows; Supplementary Figure S47D). Regions above the 99<sup>th</sup> and 95<sup>th</sup> percentiles of all comparisons, or regions that are repetitively recovered from scans with both ancient horses are candidates for artificial selection.

#### S4.3.4 Gene annotation and enrichment

We annotated candidate regions in the top 1% of every analysis with Ensembl 72, and recorded the Ensembl gene ID, genomic coordinates, associated gene names and biostatus of genes that overlap with these candidate regions. Then we performed enrichment analyses of these genes with DAVID, using horses as the background and the Benjamini-Hochberg correction to correct multiple testing. We also performed the same type of enrichment analyses on the human orthologs of these annotated genes.

#### S4.3.5 Results

Among all 301 candidate regions above the 99<sup>th</sup> percentiles of all sets of analyses with both window types, four regions are in the top 1% of more than 30 scans of modern breeds in each set of sample combinations (Supplementary Table S37), while 38 regions are ranked as the top 5% in all 32 scans of each set (Supplementary Table S38). SNPs in the top 1% candidate regions rarely possess the derived alleles in the ancient horses, but show moderate to high frequencies of derived alleles in modern breeds comparing with their neighboring regions (Supplementary Figure S49).

Candidate regions from selection scans with two pre-domesticated horses (182 regions for CGG10022 and 181 regions for CGG10023) overlap at 62 regions, a number of overlapping regions that is significantly smaller than random chance expectations (Monte Carlo simulation  $P$ -value < 0.01). Among the 62 overlapping regions, 29 regions were recovered from analyses with type 1 windows and the other 33 from analyses of the type 2 windows (Supplementary Table S39).

Gene ontology analyses of annotated genes in all candidate regions against the horse background revealed the enrichment of neuroactive ligand-receptor interaction ( $P$ -value=0.015), lysosome ( $P$ -value=0.023) and focal adhesion pathways ( $P$ -value=0.042), but not significant after correction for multiple testing. Consistent with results in Orlando *et al.* 2013 (1), limited enrichment of specific functional categories implies that no specific function or phenotype was particularly favored in the domestication process of all horse breeds.

However, our results suggested several genes that may be subject to strong selection. For example, two genes known to be affected by horse domestication have showed up in our candidate regions: *KIT* (Supplementary Figure S50), and *MC1R* (Supplementary Figure S51), the latter of which was also detected using the  $\hat{\delta}_w$  log-ratio scans (Supplementary Section S4.2). The candidate region containing the *KIT* gene, chr3: 77,000,000-78,000,000, is above 99 percentiles in Clydesdale, and is in the top 5% in the analyses with Saddlebred. The region containing the *MC1R* gene, chr3: 35,500,000-36,500,000, is the top 1% candidate for Belgian and Morgan breeds, and is above the 95<sup>th</sup> percentile for analyses with another 18 modern breeds (Akhal Teke, Arabian, Caspian, Finnhorse, French Trotter, Icelandic, Manglarga Paulista, Miniature, Mongolian, New Forest Pony, Paint, Peruvian Paso, PR Paso Fino, Quarter Horse, Saddlebred, Shire, Swiss Warmblood and Tuva). Discovery of these genes supports the power of our approach in detecting genes targeted by artificial selection.

---

| Chr | Start | End | Set1 | Set2 | Genes |
|-----|-------|-----|------|------|-------|
|-----|-------|-----|------|------|-------|

---

|    |             |             |    |    |                                                                    |
|----|-------------|-------------|----|----|--------------------------------------------------------------------|
| 22 | 9,000,000   | 10,000,000  | 32 | 0  | No annotated genes                                                 |
| 9  | 74,000,000  | 75,000,000  | 31 | 0  | <i>ST3GAL1, ZFAT, ENSECAG00000005903</i>                           |
| 1  | 128,500,000 | 129,500,000 | 0  | 32 | <i>HERC1, FBXL22, USP3, CA12, APH1B, RAB8B, RPS27L, TPM1, TLN2</i> |
| 3  | 52,500,000  | 53,500,000  | 0  | 30 | <i>WDFY3, CDS1, NKX6-1, OOEP</i>                                   |

**Supplementary Table S37. Regions in the top 1% of more than 30 breeds among all sets of comparisons of two window types**

As defined in Supplementary Figure S47C, the selection scan of set 1 makes use of donkey, CGG10022 and 32 modern breeds, while set 2 examines donkey, CGG10023 and 32 modern breeds. The two alternative window types of 1Mb are illustrated in Supplementary Figure S47D.

| Chr | Start       | End         | Set1 | Set2 | Genes                                                                                                                                                                                                                   |
|-----|-------------|-------------|------|------|-------------------------------------------------------------------------------------------------------------------------------------------------------------------------------------------------------------------------|
| 1   | 95,500,000  | 96,500,000  | -    | 32   | <i>AGBL1, ENSECAG00000004989, ENSECAG00000004887</i>                                                                                                                                                                    |
| 1   | 127,000,000 | 128,000,000 | 14   | 32   | <i>PDCD7, KIAA0101, IGDC3, TRIP4, ENSECAG000000024668, ENSECAG000000024130, PLEKHQ1, OAZ2, ANKDD1A, CLPX, RBPM2, CILP, SPG21, MTFMT, SLC51B, PARP16, RASL12, CSNK1G1, PIF1, KBTBD13</i>                                 |
| 1   | 128,500,000 | 129,500,000 | -    | 32   | <i>HERC1, TLN2, CA12, USP3, FBXL22, TPM1, RPS27L, RAB8B, APH1B</i>                                                                                                                                                      |
| 2   | 60,000,000  | 61,000,000  | 32   | 22   | <i>GLRA3, ENSECAG000000023845, DEFB131, ADAM29, ENSECAG00000002168, DEFB136</i>                                                                                                                                         |
| 2   | 75,500,000  | 76,500,000  | -    | 32   | <i>C4orf46, FAM198B, TMEM144, RXFP1, ETFDH, PPID, FNIP2, C4orf45, ENSECAG00000003376</i>                                                                                                                                |
| 3   | 8,500,000   | 9,500,000   | -    | 32   | <i>CPNE2, AMFR, ENSECAG000000015275, MT3, NLRC5, SLC12A3, MT4, RSPRY1, GNAO1, HERPUD1, BBS2, FAM192A, OGFOD1, NUP93, ENSECAG00000001555, NUDT21, ENSECAG00000000368, ENSECAG00000000363, ENSECAG00000000358</i>         |
| 3   | 52,500,000  | 53,500,000  | -    | 32   | <i>ENSECAG000000023821, NKX6-1, WDFY3, CDS1, OOEP</i>                                                                                                                                                                   |
| 4   | 80,000,000  | 81,000,000  | -    | 32   | <i>DRG1, POT1, GPR37</i>                                                                                                                                                                                                |
| 5   | 11,500,000  | 12,500,000  | 32   | 28   | <i>PAPPA2, FAM5B, ENSECAG000000024280, ASTN1</i>                                                                                                                                                                        |
| 7   | 10,000,000  | 11,000,000  | -    | 32   | <i>CNTN5</i>                                                                                                                                                                                                            |
| 7   | 10,500,000  | 11,500,000  | -    | 32   | <i>PGR, ARHGAP42, CNTN5</i>                                                                                                                                                                                             |
| 7   | 70,500,000  | 71,500,000  | 32   | -    | <i>ENSECAG000000022725, LAMTOR1, LRTOMT, ANAPC15, ENSECAG000000020411, ENSECAG000000019909, PDE2A, ENSECAG000000018619, INPPL1, PHOX2A, ARAP1, STARD10, ENSECAG000000015031, ATG16L2, CLPB, FCHSD2, P2RY2, ARHGEF17</i> |
| 7   | 79,500,000  | 80,500,000  | -    | 32   | <i>GALNT18, EIF4G2, CTR9, MRV11, LYVE1, RNF141, ZBED5, AMPD3</i>                                                                                                                                                        |
| 8   | 60,500,000  | 61,500,000  | -    | 32   | No annotated genes                                                                                                                                                                                                      |
| 9   | 74,000,000  | 75,000,000  | 32   | -    | <i>ZFAT, ST3GAL1, ENSECAG00000005903</i>                                                                                                                                                                                |
| 10  | 39,000,000  | 40,000,000  | -    | 32   | <i>ZNF292, CG, HTR1E, ENSECAG00000003407</i>                                                                                                                                                                            |
| 10  | 55,000,000  | 56,000,000  | 32   | 27   | <i>PREP, ENSECAG000000021367, LIN28B, HACE1, ENSECAG000000008961</i>                                                                                                                                                    |
| 11  | 11,500,000  | 12,500,000  | 32   | -    | <i>FAM20A, ARSG, ABCA9, ENSECAG000000022227, ABCA8, GNA13, AMZ2, SLC16A6, ABCA5, ABCA6, WIP11, ENSECAG00000002254, PRKARIA, ABCA10</i>                                                                                  |
| 11  | 33,000,000  | 34,000,000  | 32   | -    | <i>CLTC, DHX40, ENSECAG000000018590, YPEL2, ENSECAG000000017636, GDPD1, SMG8, PRR11, ENSECAG000000015007, RPS6KB1, TUBD1, TRIM37, PPM1E, VMP1, PTRH2, ENSECAG000000003590</i>                                           |
| 11  | 34,500,000  | 35,500,000  | 20   | 32   | <i>TBX2, TBX4, C17orf64, APPBP2, PPM1D, BCAS3,</i>                                                                                                                                                                      |

|    |            |            |    |    |                                                                                                                                                                                                                                                                                                                                                                                                                                                  |
|----|------------|------------|----|----|--------------------------------------------------------------------------------------------------------------------------------------------------------------------------------------------------------------------------------------------------------------------------------------------------------------------------------------------------------------------------------------------------------------------------------------------------|
|    |            |            |    |    | <i>ENSECAG00000003698</i>                                                                                                                                                                                                                                                                                                                                                                                                                        |
| 11 | 35,000,000 | 36,000,000 | 10 | 32 | <i>MRM1, DHRS11, GGNBP2, MYO19, ZNHIT3, CA4, USP32, C17orf64, APPBP2, PPMID, PIGW, ENSECAG00000003729</i>                                                                                                                                                                                                                                                                                                                                        |
| 13 | 8,000,000  | 9,000,000  | 32 | -  | <i>TFR2, ZNF3, MEPCE, MOSPD3, LRCH4, SAP25, ENSECAG00000022553, ZCWPW1, CNPY4, PCOLCE, ENSECAG00000021110, PVRIG, SLC12A9, GIGYF1, GNB2, ENSECAG00000016429, AGFG2, AP4MI, ENSECAG00000015672, FBXO24, MCM7, ACTL6B, MUC12, NYAP1, ENSECAG00000012736, SRRT, MUC3A, EPO, EPHB4, POP7, ENSECAG00000010102, COPS6, TAF6, TSC22D4, GPC2, C7orf61, ACHE, UFSPI, LAMTOR4, MBLAC1, PPP1R35, GAL3ST4, ENSECAG00000002581, TRIP6, ENSECAG00000001032</i> |
| 14 | 22,000,000 | 23,000,000 | 32 | -  | <i>SGCD, HAVCR1, HAVCR2, FAM71B, ITK, ENSECAG00000004332, MED7</i>                                                                                                                                                                                                                                                                                                                                                                               |
| 14 | 68,500,000 | 69,500,000 | -  | 32 | <i>FAM174A, ST8SIA4, ENSECAG00000002396, ENSECAG00000002335</i>                                                                                                                                                                                                                                                                                                                                                                                  |
| 15 | 25,500,000 | 26,500,000 | 32 | -  | <i>ENSECAG00000002005</i>                                                                                                                                                                                                                                                                                                                                                                                                                        |
| 15 | 38,500,000 | 39,500,000 | 32 | -  | <i>FAM161A, CCT4, COMMD1, B3GNT2, TMEM17, EHBPI, ENSECAG00000002836</i>                                                                                                                                                                                                                                                                                                                                                                          |
| 15 | 41,500,000 | 42,500,000 | 32 | -  | <i>ENSECAG00000011245</i>                                                                                                                                                                                                                                                                                                                                                                                                                        |
| 16 | 34,500,000 | 35,500,000 | 32 | 32 | <i>ITIH1, ENSECAG00000024754, ENSECAG00000023559, PRKCD, RFT1, SEMA3G, MUSTN1, BAPI, TNNC1, PHF7, ENSECAG00000018596, NEK4, NT5DC2, GNL3, ALAS1, TLR9, WDR82, GLYCTK, PPMIM, STAB1, NISCH, SFMBT1, ENSECAG00000006260, TKT, ENSECAG00000004579, ITIH3, ITIH4, PBRM1, DNAH1, GLT8D1</i>                                                                                                                                                           |
| 16 | 86,500,000 | 87,500,000 | 32 | 31 | <i>ENSECAG00000024575, GMPS, SLC33A1, C3orf33, PLCH1, MME, ENSECAG00000001897</i>                                                                                                                                                                                                                                                                                                                                                                |
| 17 | 6,500,000  | 7,500,000  | 32 | -  | <i>ENSECAG00000021095, LNX2, MTIF3, GTF3A, RASL11A, ENSECAG00000010661, USP12, POLRID, ENSECAG00000002829, GPR12, WASF3</i>                                                                                                                                                                                                                                                                                                                      |
| 17 | 55,500,000 | 56,500,000 | 32 | -  | <i>ENSECAG00000002806, ENSECAG00000002767, ENSECAG00000002737, SLITRK1</i>                                                                                                                                                                                                                                                                                                                                                                       |
| 18 | 66,000,000 | 67,000,000 | 32 | -  | <i>INPPI, ASNSD1, HIBCH, SLC40A1, MSTN, PMS1, ORMDL1, OSGEPL1, NAB1, TMEM194B, MFSD6, ANKAR, C2orf88</i>                                                                                                                                                                                                                                                                                                                                         |
| 19 | 50,500,000 | 51,500,000 | 32 | -  | <i>ALCAM, CBLB</i>                                                                                                                                                                                                                                                                                                                                                                                                                               |
| 20 | 61,000,000 | 62,000,000 | 32 | -  | <i>LMBRD1, COL9A1, BAI3, COL19A1</i>                                                                                                                                                                                                                                                                                                                                                                                                             |
| 21 | 16,500,000 | 17,500,000 | -  | 32 | <i>DHX29, SKIV2L2, DDX4, GZMA, GPX8, PPAP2A, IL31RA, CDC20B, MCIN, CCNO, SLC38A9, ESM1, GZMK</i>                                                                                                                                                                                                                                                                                                                                                 |
| 22 | 9,000,000  | 10,000,000 | 32 | -  | <i>No annotated genes</i>                                                                                                                                                                                                                                                                                                                                                                                                                        |
| 24 | 21,500,000 | 22,500,000 | 32 | 12 | <i>ANGEL1, VASH1, TGFB3, ESRRB, KIAA1737, IRF2BPL, GPATCH2L, C14orf166B, IFT43</i>                                                                                                                                                                                                                                                                                                                                                               |
| 30 | 25,000,000 | 26,000,000 | -  | 32 | <i>DENND1B, NEK7, CRB1, LHX9</i>                                                                                                                                                                                                                                                                                                                                                                                                                 |

**Supplementary Table S38. Regions found in the top 5% of all 32 breeds of all sets of comparisons with two different window arrangements**

Overlapped regions are not merged. Chr: chromosome number.

**Chr22: 9,000,000–10,000,000**

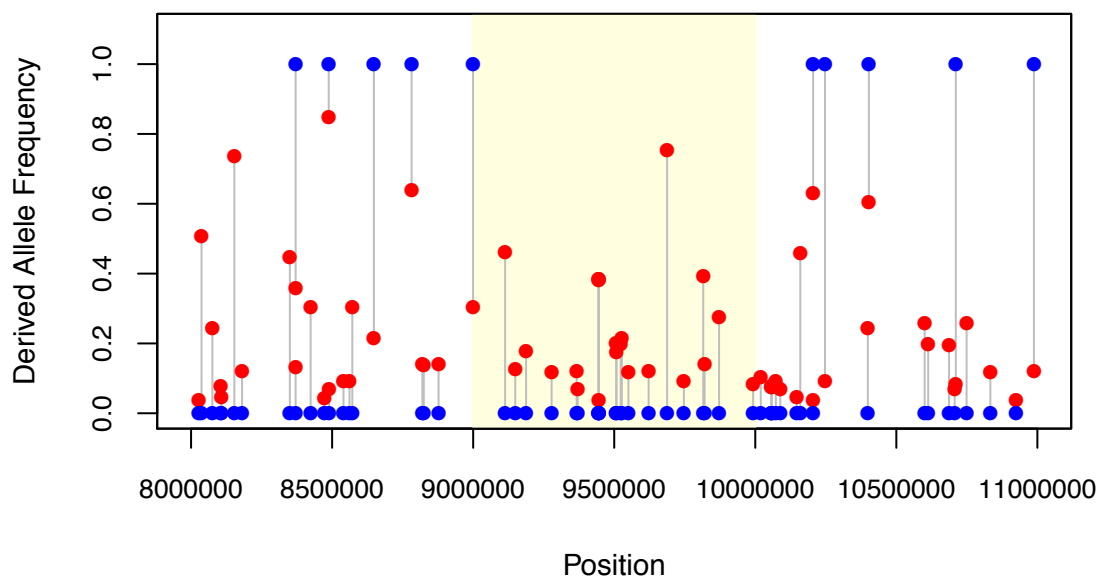

**Chr9: 74,000,000–75,000,000**

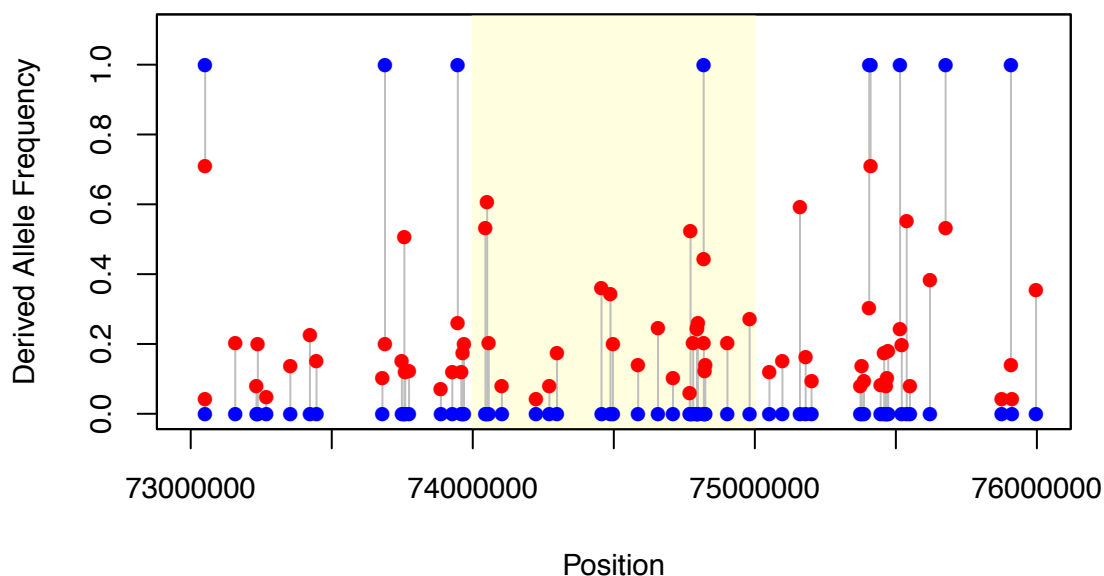

**Supplementary Figure S49. Distribution of the expected frequency of derived alleles and the observed number of derived alleles in the ancient horse**

Chromosome 22: 8,000,000-11,000,000 and chromosome 9: 73,000,000-76,000,000 in the sample combination of the domestic donkey (Willy), CGG10022 and the modern breed Arabian as examples. The yellow shaded area is the top 1% candidate region (see Supplementary Table S38 for detailed information of these two regions). Red dots represent the expected frequency of derived alleles in CGG10022, and blue dots denote the observed frequency of derived alleles in CGG10022 at each site.

| Chr | Region Start | Region End  | Set 1 |    | Set 2 |    |
|-----|--------------|-------------|-------|----|-------|----|
|     |              |             | 1%    | 5% | 1%    | 5% |
| 1   | 0            | 1,000,000   | 8     | 26 | 1     | 13 |
| 1   | 67,000,000   | 68,000,000  | 6     | 20 | 7     | 19 |
| 1   | 67,500,000   | 68,500,000  | 22    | 30 | 16    | 25 |
| 1   | 112,000,000  | 113,000,000 | 1     | 6  | 2     | 9  |
| 1   | 112,500,000  | 113,500,000 | 1     | 3  | 1     | 1  |
| 1   | 127,000,000  | 128,000,000 | 1     | 14 | 23    | 32 |
| 2   | 27,500,000   | 28,500,000  | 7     | 24 | 22    | 31 |
| 2   | 40,500,000   | 41,500,000  | 2     | 6  | 2     | 5  |
| 2   | 42,500,000   | 43,500,000  | 1     | 1  | 1     | 2  |
| 2   | 60,000,000   | 61,000,000  | 6     | 32 | 1     | 22 |
| 2   | 100,000,000  | 101,000,000 | 6     | 14 | 2     | 8  |
| 2   | 100,500,000  | 101,500,000 | 3     | 9  | 5     | 12 |
| 2   | 104,000,000  | 105,000,000 | 5     | 17 | 3     | 16 |
| 3   | 33,500,000   | 34,500,000  | 1     | 9  | 4     | 27 |
| 3   | 35,500,000   | 36,500,000  | 1     | 20 | 2     | 20 |
| 3   | 39,000,000   | 40,000,000  | 1     | 15 | 7     | 30 |
| 3   | 77,000,000   | 78,000,000  | 1     | 2  | 1     | 2  |
| 3   | 77,500,000   | 78,500,000  | 1     | 5  | 1     | 2  |
| 3   | 100,000,000  | 101,000,000 | 1     | 12 | 1     | 4  |
| 3   | 100,500,000  | 101,500,000 | 1     | 14 | 1     | 14 |
| 3   | 118,500,000  | 119,500,000 | 5     | 10 | 5     | 10 |
| 4   | 35,000,000   | 36,000,000  | 1     | 8  | 2     | 10 |
| 4   | 54,500,000   | 55,500,000  | 6     | 24 | 1     | 10 |
| 4   | 55,000,000   | 56,000,000  | 11    | 23 | 2     | 12 |
| 4   | 65,500,000   | 66,500,000  | 3     | 29 | 1     | 5  |
| 5   | 0            | 1,000,000   | 4     | 20 | 5     | 22 |
| 5   | 11,500,000   | 12,500,000  | 22    | 32 | 3     | 28 |
| 5   | 12,000,000   | 13,000,000  | 2     | 13 | 9     | 28 |
| 5   | 50,500,000   | 51,500,000  | 1     | 5  | 5     | 24 |
| 6   | 17,500,000   | 18,500,000  | 2     | 19 | 12    | 30 |
| 7   | 39,500,000   | 40,500,000  | 1     | 7  | 10    | 18 |
| 7   | 41,000,000   | 42,000,000  | 2     | 4  | 3     | 6  |
| 7   | 41,500,000   | 42,500,000  | 19    | 30 | 3     | 11 |
| 7   | 75,000,000   | 76,000,000  | 1     | 2  | 1     | 2  |
| 8   | 85,500,000   | 86,500,000  | 5     | 17 | 5     | 21 |
| 9   | 43,500,000   | 44,500,000  | 7     | 18 | 16    | 31 |
| 9   | 44,000,000   | 45,000,000  | 9     | 27 | 10    | 28 |
| 10  | 6,500,000    | 7,500,000   | 5     | 20 | 6     | 20 |
| 10  | 55,000,000   | 56,000,000  | 15    | 32 | 2     | 27 |
| 11  | 22,500,000   | 23,500,000  | 7     | 16 | 7     | 22 |
| 11  | 23,000,000   | 24,000,000  | 5     | 9  | 9     | 23 |
| 11  | 31,000,000   | 32,000,000  | 11    | 29 | 12    | 29 |



|    |            |            |    |    |    |    |
|----|------------|------------|----|----|----|----|
| 11 | 34,500,000 | 35,500,000 | 5  | 20 | 14 | 32 |
| 11 | 35,000,000 | 36,000,000 | 1  | 10 | 28 | 32 |
| 11 | 60,500,000 | 61,500,000 | 1  | 9  | 1  | 10 |
| 13 | 41,500,000 | 42,500,000 | 4  | 20 | 5  | 20 |
| 14 | 41,000,000 | 42,000,000 | 14 | 31 | 2  | 8  |
| 15 | 53,000,000 | 54,000,000 | 1  | 2  | 1  | 25 |
| 15 | 53,500,000 | 54,500,000 | 2  | 13 | 2  | 10 |
| 16 | 34,000,000 | 35,000,000 | 11 | 30 | 2  | 17 |
| 16 | 34,500,000 | 35,500,000 | 29 | 32 | 9  | 32 |
| 16 | 70,000,000 | 71,000,000 | 4  | 29 | 6  | 31 |
| 16 | 86,500,000 | 87,500,000 | 28 | 32 | 18 | 31 |
| 16 | 87,000,000 | 88,000,000 | 17 | 29 | 19 | 31 |
| 21 | 15,500,000 | 16,500,000 | 7  | 18 | 7  | 16 |
| 21 | 16,000,000 | 17,000,000 | 10 | 25 | 1  | 8  |
| 21 | 45,500,000 | 46,500,000 | 4  | 14 | 4  | 16 |
| 21 | 46,000,000 | 47,000,000 | 2  | 8  | 3  | 8  |
| 23 | 53,500,000 | 54,500,000 | 1  | 3  | 1  | 4  |
| 23 | 54,000,000 | 55,000,000 | 12 | 27 | 26 | 31 |
| 24 | 14,500,000 | 15,500,000 | 1  | 11 | 1  | 11 |
| 24 | 21,500,000 | 22,500,000 | 25 | 32 | 1  | 12 |

**Supplementary Table S39. Regions found in the top 1% of both sets of comparisons**

*Chr: Chromosome. Overlapping regions of two window types are not merged. The numbers for each set tabulates the number of breeds detected at a given threshold. Definitions of sets 1 and 2 are provided in Supplementary Figure S47.*

Clydesdale Chr3: 76,000,000–79,000,000

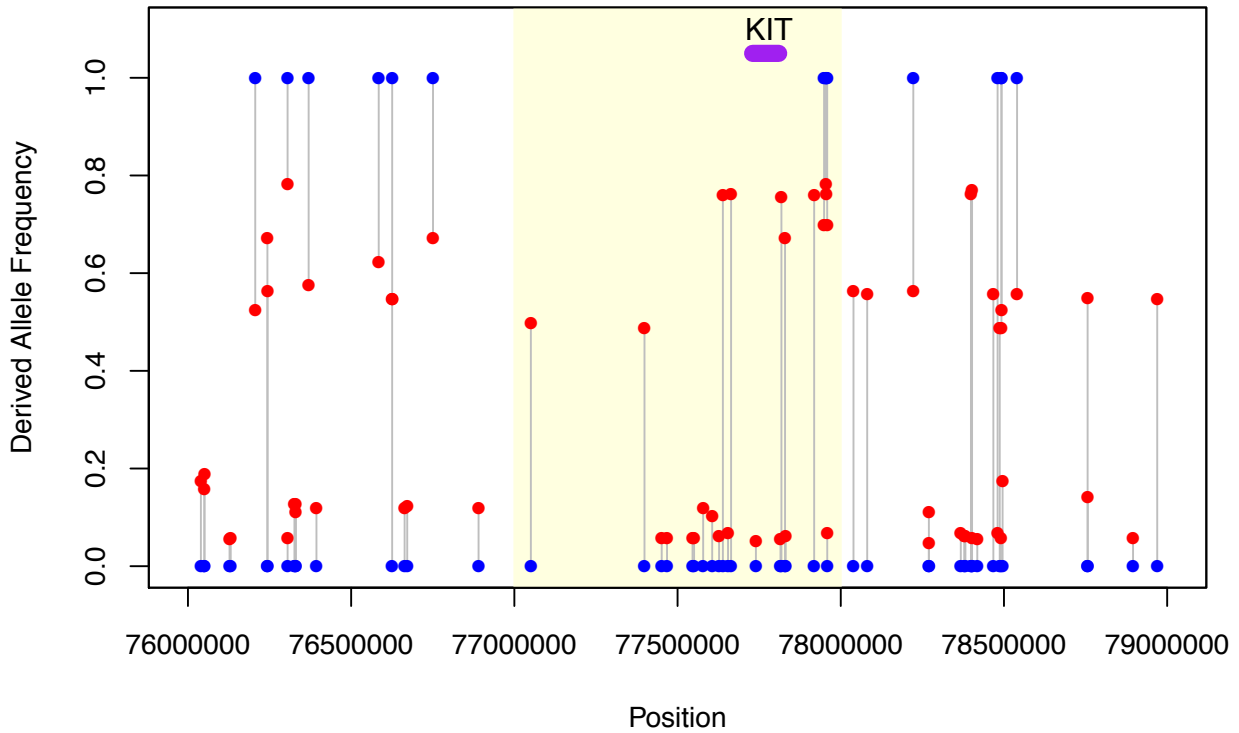

**Supplementary Figure S50. A candidate region (highlighted in yellow) enclosing the *KIT* gene in the Clydesdale breed**

Red dots represent the expected frequency of derived alleles in CGG10022, and blue dots denote the observed frequency of derived alleles in CGG10022 at each site. Coordinates for the *KIT* gene are Chr3: 77,730,011 - 77,809,756; this region is highlighted by a purple horizontal bar.

**Belgian Chr3: 34,500,000–37,500,000**

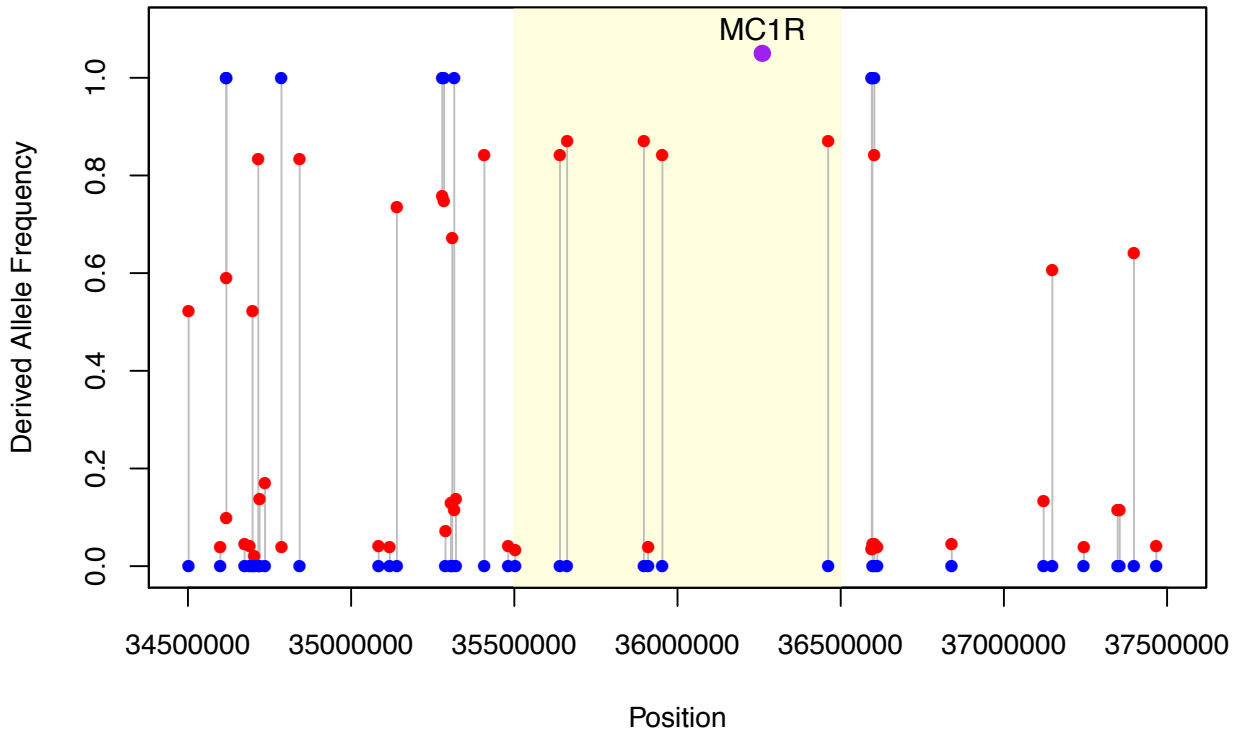

**Supplementary Figure S51. A candidate region (highlighted in yellow) enclosing the MC1R gene in the Belgian breed**

Red dots represent the expected frequency of derived alleles in CGG10022, and blue dots denote the observed frequency of derived alleles in CGG10022 at each site. Coordinates for the MC1R gene are Chr3: 36,259,276-36,260,354, and this gene is highlighted by a purple dot in the figure.

## S4.4 Selective sweep scans using a Hidden Markov Model

### S4.4.1 Background

We used a Hidden Markov Model (HMM) to identify signatures of selection in genes or regions of the horse genome, based on the genetic variation of modern horse genomes and the state of the pre-domesticated genome. This model is modified from the HMM model developed by Prüfer *et al.* (119), which identified genomic regions under selection in chimpanzees in comparison with the Bonobo. The horse genome is viewed as a sequential Markov chain of external and internal states (as defined in Supplementary Figure S47) going along the genome sequence as defined in Supplementary Figure S52. The state of each locus depends on those of the neighboring loci because of linkage and recombination, and such a relationship is modeled by ‘transition probabilities’. The state at each locus, though hidden, emits observable states, i.e. alleles of each locus being derived (D) or ancestral (A) in modern horses, with certain probabilities (termed as ‘emission probability’). This Hidden Markov Model, combined with the coalescent theory, allows for inference of the most probable sequential distribution of external and internal states in the horse genome. Regions of extended and continuous external states represent candidates for artificial selection.

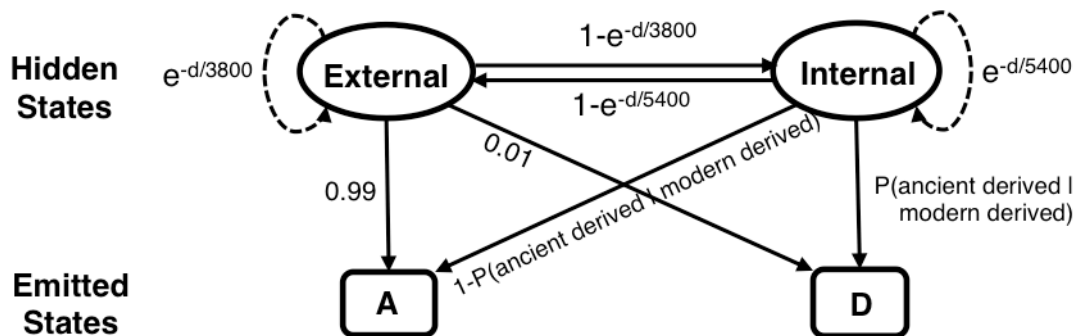

### Supplementary Figure S52. Diagram of the Hidden Markov Model

Values ‘3800’ and ‘5400’ in the equations of transition probabilities are the average lengths of external and internal regions estimated by coalescent simulations. Details are described in the Supplementary Section S4.4.3.

### S4.4.2 Initial data processing

We haploidized the complete genome sequences of six modern horses (Arabian, Norwegian Fjord, Icelandic (unnamed), Icelandic (P5782), Standardbred and Thoroughbred (Twilight)) and the outgroup the Domestic donkey (Willy) following the same approach as described in Supplementary Section S4.3.2. We discovered SNPs from ‘haploidized’ genomes of six modern horses, and retrieved bases at these positions from the ‘haploidized’ genomes of the outgroup species.

‘Haploidization’ of the ancient horse genome leads to inclusion of DNA damage in the final dataset; to avoid this we performed genotype calling on CGG10022 by GATK UnifiedGenotyper (14) with the option of ‘emit all sites’, obtained genotypes at the SNP positions, and filtered these genotypes by read depths (DP) and genotype qualities (GQ) ( $8 \leq DP \leq 59$  and  $GQ \geq 20$ ). The cutoff of DP and

GQ were determined from genome-wide distributions of these two variables – less than 95% of positions possess  $GQ \geq 20$  and about 85% of SNP positions possess DP between 8 and 59. Then we took a random base at heterozygous sites that passed filters at each position, and consequentially haploidized the genome of CGG10022. We combined SNPs of outgroups and horses, filtered them with the criteria of a) autosomal, b) bi-allelic, c) with known alleles in all horses, d) with known ancestral alleles in donkey Willy, and polarized these SNPs by viewing the allele in donkey as ancestral and the alternative one in modern horses as derived.

#### S4.4.3 Model training and coalescent simulation

For the HMM model we trained two sets of parameters; emission probabilities of internal states and transition probabilities between the internal and external states (Supplementary Figure S52). We estimated percentages of derived alleles in the ancient horse CGG10022 conditioned on derived allele frequencies of modern horses,  $P(\text{ancient derived}|\text{modern derived})$  (Supplementary Figure S53), and used this function as the emission probabilities of derived alleles given the hidden state of 'internal'.

We used an exponential distribution, a memory-less function, to model the transition probabilities between hidden states,  $P(d|\beta) = 1 - e^{-d/\beta}$ , where  $d$  is the physical distance (quantified in base pairs) between two adjacent SNPs. The parameter of the exponential distribution,  $\beta$ , equals to the expected values of  $d$ , i.e. average lengths of external and internal regions. We performed simulations with the coalescent simulator *fastsimcoal2* (92) to estimate lengths of external and internal regions under the null hypothesis of neutrality. We used a scenario of horse demography (Supplementary Figure S54) inferred from results of PSMC (Supplementary Figure S28) and previous studies of horse mitochondrial haplotypes (91). We assumed that the mutation rate is  $7.242 \times 10^{-9}$  per generation per site (with a generation time of 8 years), and that the recombination rate is 1cM/Mb (1, 91, 120). We simulated 100 10 Mb regions under this scenario, sampled one individual from the simulated outgroup, one from the ancient horse 43 kyr BP and six from the modern horses, determined states (external or internal) of every recombination block based on the phylogenetic relationships of ancient and modern horses at that region. We estimated average lengths of external (3,883 base pairs, rounded down to 3,800 for model simplicity) and internal regions (5,407 base pairs, rounded down to 5,400) in the simulated datasets. All trained parameters for transition and emission probabilities are illustrated in Supplementary Figure S52.

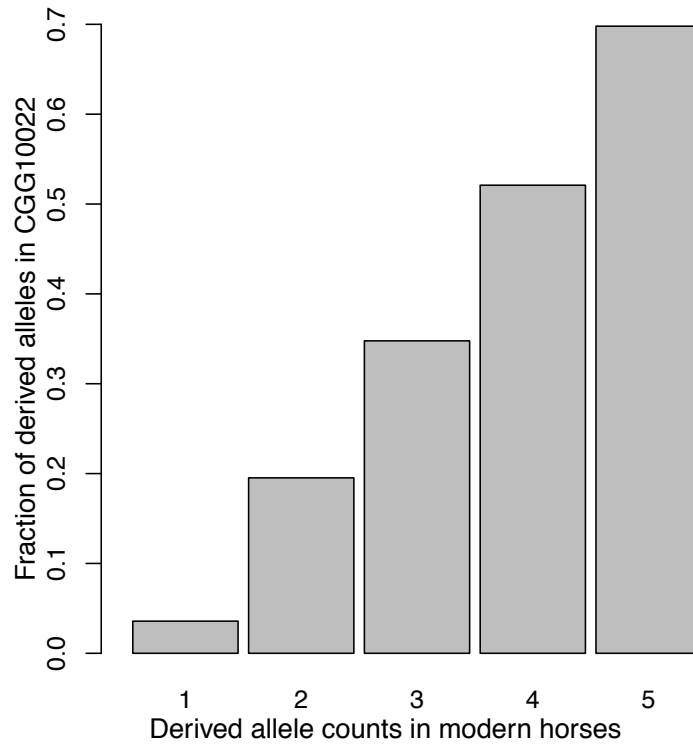

**Supplementary Figure S53. Conditional probabilities of derived alleles in CGG10022 given the numbers of derived alleles in modern horses**

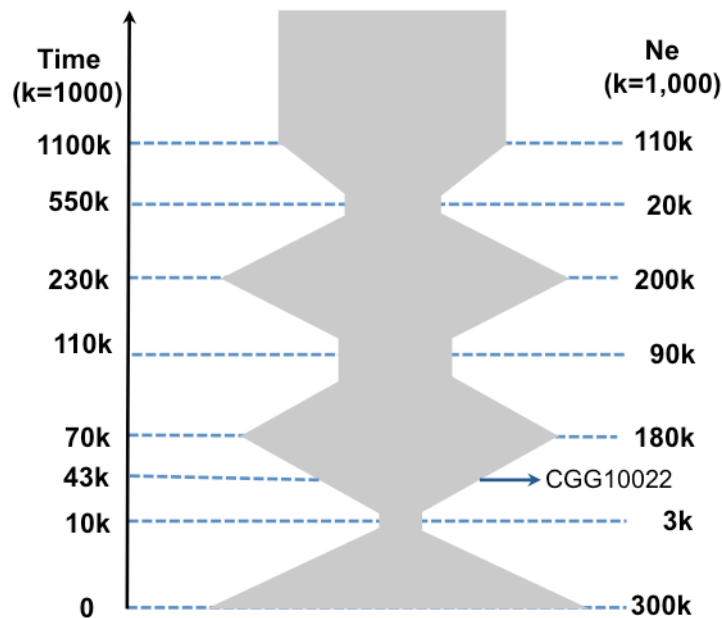

**Supplementary Figure S54. Horse demography used for simulation**

Timing of population expansion/bottleneck in the past is listed on the left next to the time arrow (from present to the past) and the population sizes ( $N_e$ ) are shown on the right. One ancient horse (CGG10022) was sampled at 43 kyr BP (labeled with an arrow).

#### S4.4.4 Selective sweep scan with HMM

We used and modified the C++ program developed by Prüfer *et al.* (119), to perform the selection sweep scan with HMM. This program uses the forward-backward algorithm to estimate posterior probabilities of each site being external or internal through forward and backward propagations and scaling (121). We then performed posterior decoding, assigned sites as external/internal with a posterior probability cutoff of 0.8 (external if the posterior probability being in that state is greater than 0.8, and vice versa). We designated regions with at least two adjacent and continuous external SNPs as 'external' regions, and ranked these regions based on their lengths. We annotated genes that overlap with these regions, examined the distribution of external sites in coding sequences, determined non-synonymous and synonymous substitutions with Ensembl Variant Effect Predictor (19), and examined the ancient horse genotype and derived allele frequencies in modern horses at these sites. We also performed gene ontology analyses in DAVID with horse and human as backgrounds (the same approach as described in supplementary section S4.3.4).

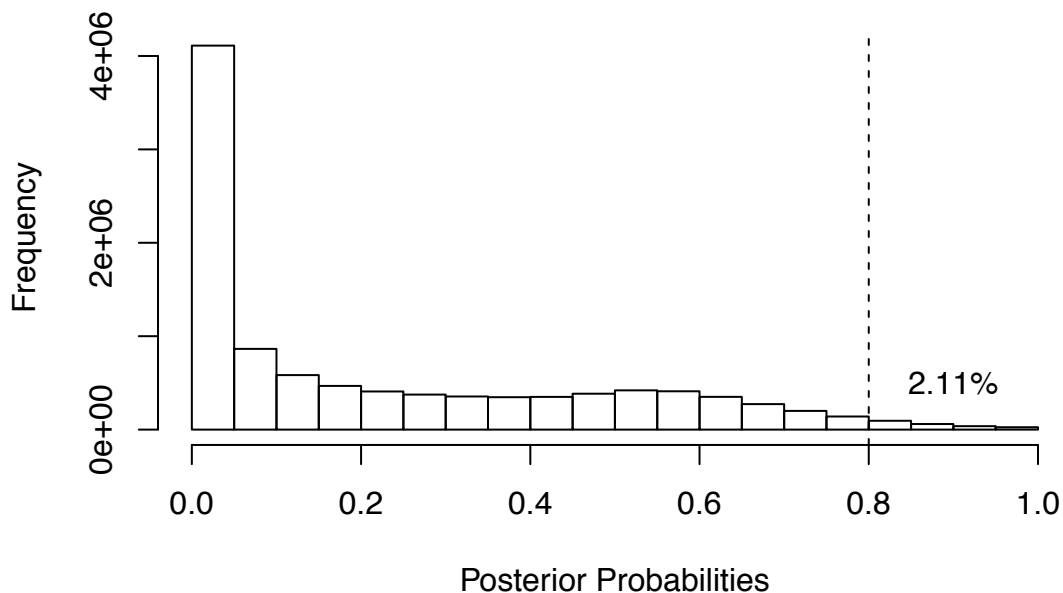

**Supplementary Figure S55. Histogram of the posterior probabilities of being in an external state**

*The vertical dashed line represents the probability cutoff of 0.8 for posterior decoding of external sites.*

#### S4.4.5 Results

A total of 10,255,648 SNPs were used in the analyses with the HMM model after discovery, screening and filtering, out of which 216,467 sites were classified as in the 'external' states based on the posterior probability cutoff of 0.8. This cutoff of 0.8 selected about two percent of all SNP sites (Supplementary Figure S55). We found 19,007 external regions, among which 9.15% of these regions are longer than 3.8kb (Supplementary Figure S56). The longest external region is of 20,855 bp and contains 125 SNP loci (Chromosome 15: 88,729,884 - 88,750,738) (Supplementary Table S40).

A total of 262 protein-coding genes annotated in Ensembl v72 (122) overlap with these 'external' regions. Functional categories such as calcium signaling pathway ( $P$ -value=0.0034), gonadotropin releasing hormone signaling pathway ( $P$ -value=0.0068), arrhythmogenic right ventricular cardiomyopathy ( $P$ -value=0.017), hypertrophic cardiomyopathy ( $P$ -value=0.025), dilated cardiomyopathy ( $P$ -value=0.032), MAPK signaling pathway ( $P$ -value=0.025), colorectal cancer ( $P$ -value=0.032) and ABC transporters ( $P$ -value=0.035) are enriched with the horse background by DAVID (123, 124), but none of these functional categories was specifically enriched after the Benjamini correction for multiple tests. The longest 'external' region overlaps with the gene *TRAPPC12*, a traffic protein that may be involved in autophagy (125) (Supplementary Table S40; Supplementary Figure S57). The 3<sup>rd</sup> longest region overlaps with the *CNTN6* gene (Supplementary Figure S57). *CNTN6* encodes contactin 6, a glycosylphosphatidylinositol-anchored neuronal membrane protein that affects the neuro-development (126). Mice with this gene knocked out are lack of motor coordination and balance (127), traits that are essential for farming and equestrian in modern horse breeds. Exon 2 of *CNTN6*, which is highly conserved among outgroup, ancient and modern samples, falls within this external region (Supplementary Figure S57).

A total of 857,416 SNPs fall within exons of horse genes, among which 2.1% (18,165 SNPs) possess posterior probabilities no less than 0.8 and 11.9% (102,446 SNPs) no less than 0.6. A total of 77 genes contain SNP sites at which posterior probabilities are larger than 0.8, substitutions between ancient and modern alleles are non-synonymous, and CGG10022 is homozygous ancestral and all modern horses possess the derived alleles (Supplementary Table S41).

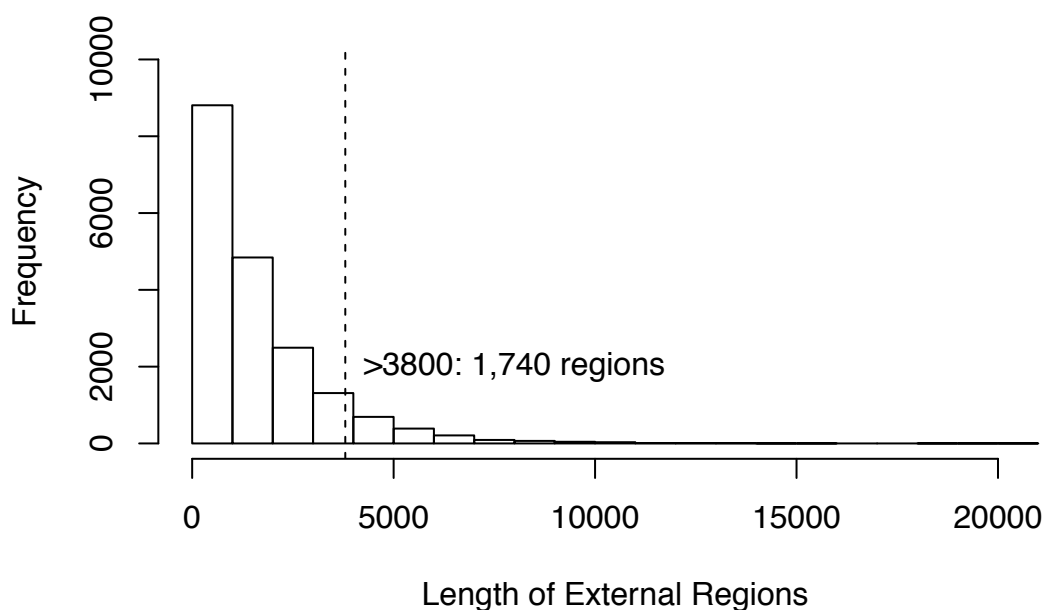

**Supplementary Figure S56. Size distributions of external regions**

External regions are defined by SNP sites with more than two adjacent and continuous external SNPs.

| Chr | Start      | End        | Region Length | Number of SNPs | Gene Name       |
|-----|------------|------------|---------------|----------------|-----------------|
| 15  | 88,729,884 | 88,750,738 | 20,855        | 125            | <i>TRAPPC12</i> |



|    |             |             |        |     |                           |
|----|-------------|-------------|--------|-----|---------------------------|
| 11 | 31,453,385  | 31,472,818  | 19,434 | 78  | -                         |
| 16 | 14513,141   | 14,531,992  | 18,852 | 91  | <i>CNTN6</i>              |
| 7  | 39,863,290  | 39,878,613  | 15,324 | 83  | -                         |
| 31 | 9,658,624   | 9,673,463   | 14,840 | 103 | <i>C6orf70</i>            |
| 11 | 9,742,613   | 9,756,392   | 13,780 | 103 | -                         |
| 18 | 7,541,178   | 7,554,733   | 13,556 | 51  | -                         |
| 6  | 31,993,094  | 32,006,490  | 13,397 | 66  | -                         |
| 18 | 59,619,755  | 59,633,117  | 13,363 | 59  | <i>SSFA2</i>              |
| 17 | 54,645,639  | 54,658,758  | 13,120 | 53  | <i>ENSECAG00000011378</i> |
| 1  | 120,022,080 | 120,035,159 | 13,080 | 50  | <i>C15orf60</i>           |
| 3  | 47,486,981  | 47,499,990  | 13,010 | 53  | -                         |
| 10 | 60819,378   | 60,832,379  | 13,002 | 49  | -                         |
| 3  | 24,328,847  | 24,341,498  | 12,652 | 71  | -                         |
| 8  | 38,601,299  | 38,613,846  | 12,548 | 71  | <i>TMEM241</i>            |
| 7  | 49,723,029  | 49,735,459  | 12,431 | 61  | <i>S1PR2</i>              |
| 22 | 22,929,858  | 22,942,271  | 12,414 | 54  | <i>PDRG1</i>              |
| 1  | 57,626,587  | 57,638,750  | 12,164 | 63  | -                         |
| 8  | 71,130,295  | 71,142,367  | 12,073 | 48  | <i>DCC</i>                |
| 26 | 426,210     | 438,261     | 12,052 | 77  | -                         |
| 31 | 13,699,018  | 13,711,046  | 12,029 | 44  | -                         |
| 5  | 26,150,505  | 26,162,506  | 12,002 | 57  | -                         |
| 14 | 33,949,120  | 33,960,832  | 11,713 | 59  | -                         |
| 10 | 31,065,551  | 31,077,248  | 11,698 | 54  | -                         |
| 1  | 185,544,480 | 185,556,090 | 11,611 | 59  | <i>NID2</i>               |
| 4  | 15,595,732  | 15,607,328  | 11,597 | 41  | <i>MYO1G</i>              |
| 3  | 34,741,949  | 34,753,531  | 11,583 | 39  | -                         |
| 2  | 69,822,523  | 69,834,022  | 11,500 | 50  | -                         |
| 7  | 42,482,989  | 42,494,334  | 11,346 | 42  | <i>ENSECAG00000019629</i> |
| 7  | 31,634,201  | 31,645,500  | 11,300 | 83  | -                         |
| 14 | 83,331,068  | 83,342,202  | 11,135 | 45  | -                         |
| 2  | 50,910,787  | 50,921,860  | 11,074 | 45  | <i>XPO7</i>               |
| 20 | 28,401,756  | 28,412,679  | 10,924 | 66  | -                         |
| 7  | 42,184,994  | 42,195,906  | 10,913 | 45  | -                         |
| 16 | 46,422,485  | 46,433,355  | 10,871 | 45  | <i>SCN11A</i>             |
| 14 | 41,365,033  | 41,375,880  | 10,848 | 56  | -                         |
| 2  | 69,071,828  | 69,082,589  | 10,762 | 47  | -                         |
| 19 | 39,185,459  | 39,196,191  | 10,733 | 43  | <i>PLA1A</i>              |
| 10 | 43,090,882  | 43,101,586  | 10,705 | 44  | -                         |
| 17 | 16,939,028  | 16,949,721  | 10,694 | 47  | -                         |
| 20 | 63,841,718  | 63,852,400  | 10,683 | 81  | -                         |
| 30 | 4,944,161   | 4,954,816   | 10,656 | 76  | <i>KIF26B</i>             |
| 15 | 7,002,998   | 7,013,541   | 10,544 | 56  | <i>SLC9A2</i>             |
| 13 | 28,225,492  | 28,235,998  | 10,507 | 48  | <i>ARL6IP1</i>            |
| 7  | 39,194,652  | 39,205,152  | 10,501 | 67  | -                         |
| 15 | 27,567,169  | 27,577,626  | 10,458 | 55  | <i>GCFC2</i>              |
| 4  | 18,228,390  | 18,238,802  | 10,413 | 61  | <i>ABCA13</i>             |
| 5  | 74,222,430  | 74,232,836  | 10,407 | 55  | -                         |
| 14 | 26,283,600  | 26,293,980  | 10,381 | 46  | -                         |
| 15 | 45,285,072  | 45,295,414  | 10,343 | 43  | <i>EML6</i>               |
| 22 | 48,245,690  | 48,255,970  | 10,281 | 46  | <i>LAMA5</i>              |
| 9  | 44,092,487  | 44,102,731  | 10,245 | 38  | -                         |
| 21 | 9,621,567   | 9,631,800   | 10,234 | 56  | -                         |
| 15 | 52,180,722  | 52,190,938  | 10,217 | 51  | -                         |
| 1  | 115,914,913 | 115,925,115 | 10,203 | 39  | <i>WDR61</i>              |
| 1  | 68,399,204  | 68,409,347  | 10,144 | 41  | <i>ACTA1, NUP133</i>      |
| 2  | 47,715,889  | 47,726,030  | 10,142 | 36  | <i>PRKCZ</i>              |
| 1  | 177,662,240 | 177,672,376 | 10,137 | 58  | -                         |
| 20 | 45,494,600  | 45,504,713  | 10,114 | 40  | -                         |

|    |            |            |        |    |               |
|----|------------|------------|--------|----|---------------|
| 3  | 34,012,659 | 34,022,762 | 10,104 | 47 | <i>FBXO31</i> |
| 19 | 50,460,897 | 50,470,987 | 10,091 | 44 | -             |
| 7  | 51,924,403 | 51,934,449 | 10,047 | 39 | -             |
| 6  | 59,806,946 | 59,816,974 | 10,029 | 41 | <i>CNTN1</i>  |
| 5  | 44,780,308 | 44,790,322 | 10,015 | 51 | -             |

**Supplementary Table S40. External regions longer than 10 kb and their annotated genes**

Chr: chromosome.

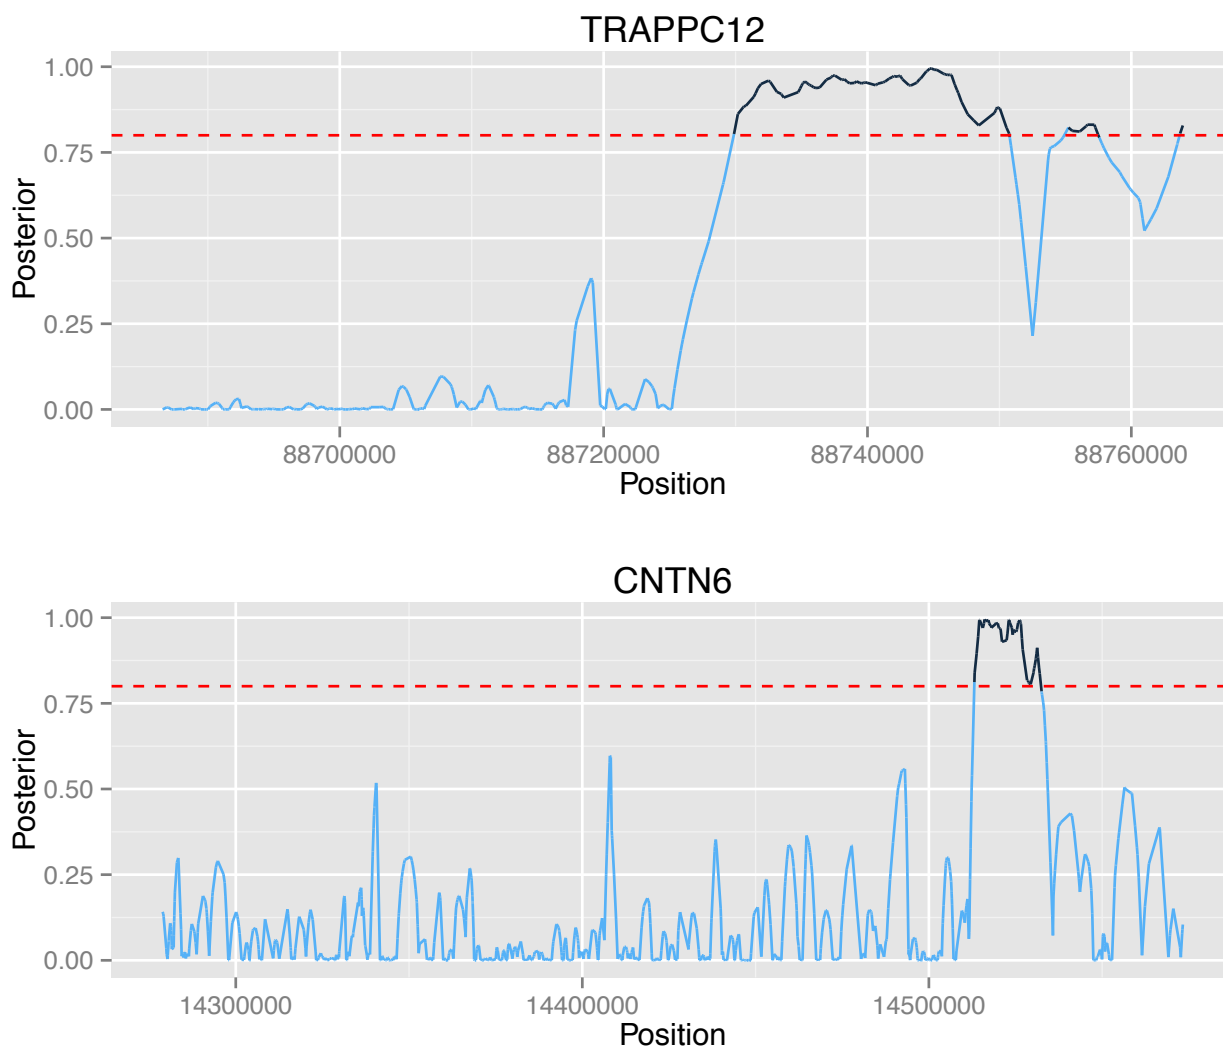

**Supplementary Figure S57. Genes within the longest external regions**

Red dashed lines represent posterior probability cutoff of 0.8. Light blue lines connect sites with posterior probabilities lower than 0.8 and the dark blue lines connect external sites. Coordinates for *TRAPPC12* are chr15: 88,686,290 – 88,763,968 and for *CNTN6* gene are chr16: 14,278,424 - 14,573,446.

| Chr | Position   | Anc | Dir | PP   | Gene ID            | Gene Name    | Existing Variation |
|-----|------------|-----|-----|------|--------------------|--------------|--------------------|
| 1   | 32,196,665 | A   | G   | 0.81 | ENSECAG00000011973 | <i>SLIT1</i> | -                  |

|    |             |   |   |      |                     |                 |            |
|----|-------------|---|---|------|---------------------|-----------------|------------|
| 1  | 69,377,219  | C | G | 0.98 | ENSECAG00000016463  | <i>TMEM72</i>   | -          |
| 1  | 145,351,508 | C | T | 0.81 | ENSECAG00000008753  |                 | -          |
| 2  | 34,327,524  | G | A | 0.93 | ENSECAG00000020925  | <i>TMCO4</i>    | -          |
| 3  | 28,944,191  | G | A | 0.94 | ENSECAG00000015980  | <i>PKD1L2</i>   | rs68558449 |
| 3  | 64,591,106  | C | G | 0.80 | ENSECAG00000001758  | <i>PROL1</i>    | -          |
| 3  | 76,359,038  | A | C | 0.88 | ENSECAG000000023644 |                 | -          |
| 3  | 78,172,372  | A | C | 0.91 | ENSECAG00000018176  | <i>PDGFRA</i>   | -          |
| 3  | 80,073,927  | A | G | 0.98 | ENSECAG00000024870  | <i>CWH43</i>    | -          |
| 3  | 81,294,891  | T | C | 0.92 | ENSECAG00000012518  | <i>ATP10D</i>   | rs68545218 |
| 4  | 49,061,788  | G | T | 0.82 | ENSECAG00000013150  | <i>LRRC72</i>   | -          |
| 4  | 58,126,022  | G | C | 0.80 | ENSECAG00000021767  | <i>HOXA1</i>    | -          |
| 4  | 63,423,815  | A | G | 0.83 | ENSECAG00000022057  | <i>BBS9</i>     | -          |
| 4  | 97,188,977  | A | G | 0.87 | ENSECAG00000007025  |                 | rs69508703 |
| 5  | 7,304,333   | G | A | 0.90 | ENSECAG00000012649  | <i>FMO3</i>     | rs69489114 |
| 5  | 12,977,015  | C | A | 0.92 | ENSECAG00000007213  | <i>SEC16B</i>   | -          |
| 5  | 22,947,298  | C | A | 0.84 | ENSECAG00000020648  | <i>PRG4</i>     | -          |
| 5  | 44,466,120  | G | C | 0.89 | ENSECAG00000016108  |                 | -          |
| 5  | 51,988,150  | A | C | 0.94 | ENSECAG00000010259  | <i>TRIM45</i>   | -          |
| 6  | 15,587,266  | T | C | 0.89 | ENSECAG00000012814  | <i>TM4SF20</i>  | -          |
| 6  | 62,260,667  | C | G | 0.94 | ENSECAG00000011182  | <i>PUS7L</i>    | -          |
| 6  | 62,260,858  | G | A | 0.95 | ENSECAG00000011182  | <i>PUS7L</i>    | -          |
| 6  | 66,500,093  | C | A | 0.89 | ENSECAG00000007947  |                 | -          |
| 6  | 71,862,711  | G | A | 0.81 | ENSECAG00000003338  |                 | -          |
| 6  | 72,153,032  | C | A | 0.83 | ENSECAG00000006061  | <i>OR6C65</i>   | -          |
| 6  | 74,855,576  | C | T | 0.92 | ENSECAG00000012166  | <i>LRP1</i>     | -          |
| 6  | 80,161,661  | T | G | 0.96 | ENSECAG00000016235  | <i>C12orf56</i> | -          |
| 7  | 14,580,827  | G | A | 0.84 | ENSECAG00000008723  | <i>CASP12</i>   | -          |
| 7  | 14,585,594  | G | C | 0.87 | ENSECAG00000008723  | <i>CASP12</i>   | -          |
| 7  | 72,132,267  | G | A | 0.92 | ENSECAG00000007735  |                 | -          |
| 7  | 73,725,837  | G | A | 0.87 | ENSECAG00000022991  |                 | -          |
| 7  | 75,081,420  | A | G | 0.80 | ENSECAG00000005439  |                 | -          |
| 7  | 75,991,240  | T | C | 0.81 | ENSECAG00000002575  |                 | -          |
| 8  | 5,425,949   | G | C | 0.90 | ENSECAG00000022168  |                 | -          |
| 8  | 5,426,669   | T | C | 0.90 | ENSECAG00000022168  |                 | -          |
| 8  | 19,404,659  | G | A | 0.90 | ENSECAG00000009544  | <i>RASAL1</i>   | -          |
| 8  | 29,671,395  | T | G | 0.95 | ENSECAG00000024483  | <i>ANKLE2</i>   | -          |
| 8  | 76,122,206  | C | T | 0.88 | ENSECAG00000016124  |                 | -          |
| 9  | 70,972,206  | G | C | 1.00 | ENSECAG00000022355  |                 | rs68793394 |
| 9  | 70,972,711  | T | C | 1.00 | ENSECAG00000022355  |                 | rs68793401 |
| 9  | 81,970,731  | C | T | 0.82 | ENSECAG00000013129  | <i>TOP1MT</i>   | -          |
| 10 | 7,232,948   | G | C | 0.90 | ENSECAG00000007992  | <i>OVOL3</i>    | -          |
| 10 | 14,844,129  | G | T | 0.95 | ENSECAG00000018247  | <i>ZNF404</i>   | rs68953542 |
| 10 | 14,844,388  | C | T | 0.96 | ENSECAG00000018247  | <i>ZNF404</i>   | -          |
| 11 | 21,935,117  | T | C | 0.90 | ENSECAG00000016177  | <i>KRT24</i>    | rs68807490 |
| 11 | 31,535,971  | T | C | 0.88 | ENSECAG00000009841  | <i>AKAP1</i>    | -          |
| 11 | 37,760,548  | G | A | 0.87 | ENSECAG00000017186  | <i>SLFN5</i>    | -          |
| 11 | 45,861,463  | C | T | 0.82 | ENSECAG00000006519  | <i>SMG6</i>     | -          |
| 11 | 49,746,950  | T | A | 0.95 | ENSECAG00000018406  | <i>CXCL16</i>   | -          |
| 12 | 13,028,368  | C | T | 0.86 | ENSECAG00000007685  |                 | -          |
| 12 | 13,693,270  | G | A | 1.00 | ENSECAG00000005518  |                 | -          |
| 12 | 13,693,306  | A | G | 1.00 | ENSECAG00000005518  |                 | -          |
| 12 | 13,693,615  | T | A | 0.98 | ENSECAG00000005518  |                 | -          |
| 12 | 15,802,361  | G | A | 0.97 | ENSECAG00000000882  | <i>OR5R1</i>    | -          |
| 12 | 15,802,362  | A | G | 0.97 | ENSECAG00000000882  | <i>OR5R1</i>    | -          |
| 12 | 15,802,374  | G | A | 0.96 | ENSECAG00000000882  | <i>OR5R1</i>    | -          |
| 12 | 15,802,751  | A | G | 0.83 | ENSECAG00000000882  | <i>OR5R1</i>    | -          |
| 12 | 17,127,298  | C | A | 0.87 | ENSECAG00000004473  |                 | -          |
| 12 | 17,545,049  | C | T | 0.95 | ENSECAG00000008427  | <i>SLC43A1</i>  | -          |

|    |            |   |   |      |                    |           |            |
|----|------------|---|---|------|--------------------|-----------|------------|
| 12 | 27,198,319 | C | T | 0.85 | ENSECAG00000016385 | GPR152    | -          |
| 13 | 8,610,746  | C | T | 0.81 | ENSECAG00000023227 | LRCH4     | rs68916110 |
| 13 | 38,162,743 | G | A | 0.86 | ENSECAG00000019336 | UBN1      | -          |
| 14 | 1,678,865  | T | C | 0.98 | ENSECAG00000016709 |           | -          |
| 14 | 41,749,494 | C | G | 0.92 | ENSECAG00000017207 | C5orf15   | -          |
| 14 | 42,827,327 | A | G | 0.88 | ENSECAG00000022349 | Sept8     | -          |
| 14 | 45,250,148 | T | G | 0.89 | ENSECAG00000023686 | KIAA1024L | -          |
| 14 | 72,018,840 | C | T | 0.81 | ENSECAG00000003636 | ERAP1     | -          |
| 14 | 89,034,578 | A | G | 0.87 | ENSECAG00000013824 | POC5      | rs68994456 |
| 14 | 89,034,621 | A | G | 0.87 | ENSECAG00000013824 | POC5      | rs68994457 |
| 15 | 55,264,660 | G | A | 0.89 | ENSECAG00000020504 | THADA     | -          |
| 15 | 65,988,896 | G | A | 0.88 | ENSECAG00000024027 | CAPN13    | -          |
| 15 | 77,062,420 | T | C | 0.91 | ENSECAG00000020295 | GEN1      | -          |
| 15 | 82,767,951 | T | G | 0.99 | ENSECAG00000010555 | ATP6V1C2  | -          |
| 15 | 82,768,351 | T | C | 1.00 | ENSECAG00000010555 | ATP6V1C2  | -          |
| 16 | 41,452,836 | A | G | 0.94 | ENSECAG00000025146 | CDCP1     | rs69080137 |
| 16 | 41,453,020 | C | A | 0.96 | ENSECAG00000025146 | CDCP1     | rs69080139 |
| 18 | 59,599,035 | C | G | 0.93 | ENSECAG00000012220 | SSFA2     | -          |
| 18 | 59,612,355 | C | A | 0.83 | ENSECAG00000012220 | SSFA2     | -          |
| 19 | 38,746,008 | C | G | 0.96 | ENSECAG00000024669 | GPR156    | -          |
| 20 | 23,740,992 | G | T | 0.82 | ENSECAG00000017259 | SLC17A1   | -          |
| 20 | 42,327,584 | C | T | 0.82 | ENSECAG00000001119 | ZNF318    | -          |
| 20 | 42,508,228 | C | A | 0.89 | ENSECAG00000000507 | XPO5      | -          |
| 23 | 20,639,345 | C | T | 0.94 | ENSECAG00000015934 | MAMDC2    | rs69256779 |
| 26 | 37,639,216 | G | A | 0.82 | ENSECAG00000013946 | UMODL1    | -          |
| 26 | 40,592,293 | G | A | 0.92 | ENSECAG00000016361 | COL18A1   | -          |
| 28 | 776,789    | G | T | 0.91 | ENSECAG00000001320 |           | rs69415182 |
| 28 | 36,540,089 | G | C | 0.92 | ENSECAG00000018973 | ENTHD1    | -          |
| 29 | 28,372,040 | C | A | 0.97 | ENSECAG00000006393 | CALML3    | -          |
| 30 | 24,873,853 | C | T | 0.81 | ENSECAG00000020645 | ASPM      | -          |
| 31 | 2,460,558  | C | T | 1.00 | ENSECAG00000021017 | SLC22A2   | -          |
| 31 | 2,460,756  | G | A | 0.99 | ENSECAG00000021017 | SLC22A2   | -          |
| 31 | 9,661,000  | G | A | 0.99 | ENSECAG00000010933 | C6orf70   | -          |

**Supplementary Table S41. List of non-synonymous sites that are homozygous ancestral in the ancient horse CGG10022, derived in five modern horses and with posterior probabilities of at least 0.8**

**Chr:** chromosome; **Position:** zero-based position of each site; **Anc:** ancestral allele; **Dir:** derived allele; **PP:** posterior probability; **Gene ID:** Ensembl gene ID of the overlapping genes. **Gene Name:** gene name, if known; **Existing Variation:** reference cluster ID of the existing SNPs in dbSNP.

## S4.5 Comparison between different selection scans

### S4.5.1 Pairwise comparisons

To assess the overall consistency between the genomic selection scans, we performed a pairwise comparison of the Ensembl gene IDs detected in all methods described above. All pairwise comparisons performed are shown in Supplementary Figure S58, using the following abbreviations:

1. **HMM**, genes detected using the Hidden Markov Model (section S4.4).
2. **PAML**, genes detected using PAML (section S4.1).
3. **SNPChip**, top 1% of genes detected using the SNPChip (section S4.3) in strictly more than 16 breeds out of 32 for either CGG10022 or CGG10023 (in either window).
4. **Raw  $\hat{\theta}_w(5)$** , top 5% of genes detected using the raw TWLR (S4.2.6), comparing the pre-domesticated horses to 5 domestic horses, excluding Icelandic (P5782).
5. **Raw  $\hat{\theta}_w(6)$** , top 5% of genes detected using the raw TWLR (S4.2.6), comparing the pre-domesticated horses to all 6 domestic horses.
6. **Raw  $\hat{\theta}_w(P)$** , top 5% of genes detected using the raw TWLR (S4.2.6), comparing Przewalski's horse to 5 domestic horses (excluding Icelandic (P5782)).
7. **Mean  $\hat{\theta}_w(5)$** , top 5% of genes detected using the region-averaged  $\hat{\theta}_w$  (S4.2.2), comparing the pre-domesticated horses with 5 domestic horses, excluding Icelandic (P5782).
8. **Mean  $\hat{\theta}_w(6)$** , top 5% of genes detected using the region-averaged  $\hat{\theta}_w$  (S4.2.4), comparing the pre-domesticated horses with all 6 domestic horses.
9. **Mean  $\hat{\theta}_w(P)$** , top 5% of genes detected using the region-averaged  $\hat{\theta}_w$  (S4.2.5), comparing the pre-domesticated horses with 5 domestic horses, excluding Icelandic (P5782).

In the case of  $\hat{\theta}_w$  sets, we choose to disregard overlap (or lack of overlap) with the Tajima's D regions detected in conjunction with these. This was motivated by the observation that no deviations were observed on the QQ-plots, suggesting that there was no signal on which to base this selection (Supplementary Figure S40 and Supplementary Figure S43).

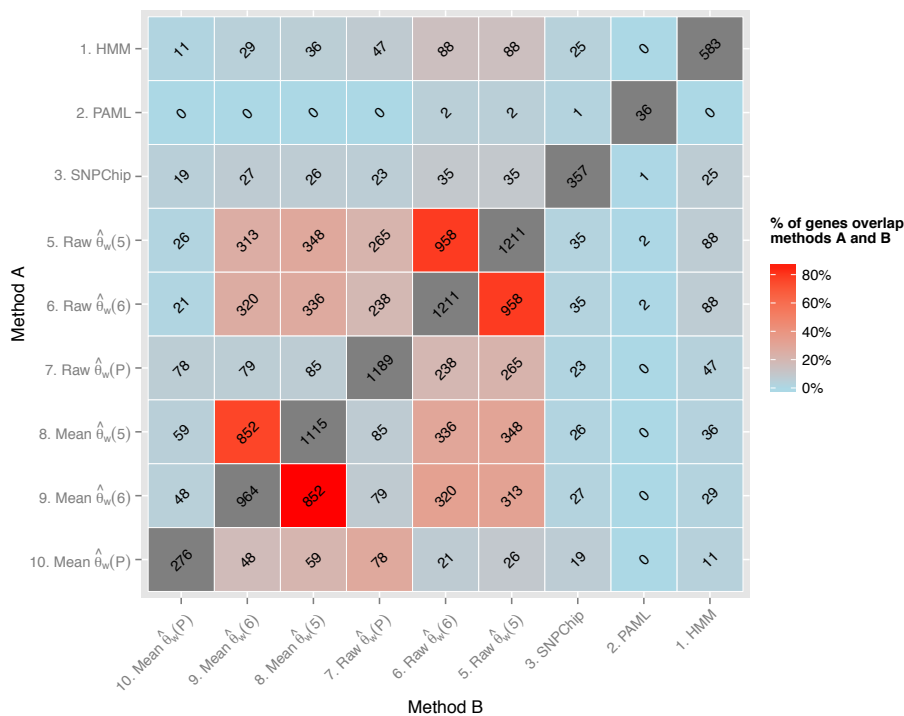

**Supplementary Figure S58. Relative overlap of Ensembl gene IDs detected as potential candidates for positive selection across all methods**

The gradient color corresponds to the percentage of overlap between two methods. The numbers inside each tile refers to the absolute number of gene IDs detected. See text for the description of the methods. Percentages were calculated  $\# \text{ genes } (M_A \cap M_B) / \# \text{ genes } (M_A)$ , for the method  $M_A$  specified by row and for the method  $M_B$  specified by column. The number of genes overlapping is calculated in a similar fashion.

#### S4.6 Weighted selection of candidate genes

We next determined which genes were detected independently by at least two of the selection scan methods implemented by relying on a weighting scheme. For tests with an associated score ( $q$ -value for PAML, length of the external region for HMM, the number of individuals for individuals for the SNP chip) the set of unique scores were collected and ranked from 1 to  $N$  according to their significance, with the rank 0 assigned to genes that were not detected by a given test. Subsequently, each a score was calculated for each gene as  $S_{t,i} = R_{t,i}/N_t$ , where  $R_{t,i}$  is the rank of gene  $i$  for test  $t$ , and  $N_t$  is the number of ranks for test  $t$ . For the  $\hat{\theta}_w$  tests, the rank was calculated as the number of tests for which the gene was detected (0 to 6), and the score calculated as describe above with  $N_t = 6$ . The sum of scores was calculated for each gene, and 125 genes with an aggregated score greater than 1 were selected (Supplementary Table S42). The full table of genes is provided as Supplementary Table S43.

Of the 125 genes, 113 had known human orthologs and these were analyzed through the use of IPA (Ingenuity® Systems, [www.ingenuity.com](http://www.ingenuity.com)), and statistically significant functional clusters were determined following Benjamini-Hochberg correction for multiple tests (Supplementary Table S44). In addition to annotations relating to cancer, this includes two annotations relating to brain development, including “development of telencephalon” and “recognition of neurons”, as well as

one annotation relating to lipid metabolism (“accumulation of lysobisphosphatidic acid”), the latter of which is important for the performance characteristics of the domestic horse.

Finally, functional clustering of all genes detected by more than one methodology (HMM, SNPChip, PAML, or  $\hat{\theta}_w$ , Supplementary Figure S59) was carried out, yielding 697 candidate genes, of which 571 had known human orthologs. Statistically significant results, following Benjamini-Hochberg correction for multiple tests, are reported in Supplementary Table S45. In addition to annotations relating to and to the nervous system, several annotations for other diseases were found (hypolipoproteinemia and hypobetalipoproteinemia).

A number of genes have previously been identified in regions determined to have undergone positive selection in the Thoroughbred, including *ACTA1*, *ACTN2*, *FOXO1*, *GRB2*, *IRS1*, *PIK3C3*, *PIK3R1*, *PTPN1*, *SOCS3*, *SOCS7*, and *STXBP4*. In addition, several genes have been identified as important to racing performance, including *COX4I2*, *MSTN*, and *PDK4* (reviewed in Hill et al. 2013 (128)). Of these, *ACTA1* and *PIK3C3* are detected using the weighting criteria described above, while *STXBP4* was detected by at least two types of selective scan, and *FOXO1*, *SOCS7*, *MSTN*, *PDK4*, and *PIK3R1* was detected by one type of scan.

While our samples includes just one Thoroughbred horse, it is notable that we were able to detect most of the genes listed above, suggesting the validity of our approach. However, the fact that only two of the eight genes detected exceeded the threshold value we selected also indicates that the set of 125 genes constitute a conservative set of candidates for positive selection in the domestic horse.

| Weight | Ensembl Gene ID    | Gene Name       | Description                                                          |
|--------|--------------------|-----------------|----------------------------------------------------------------------|
| 1.855  | ENSECAG00000016246 | <i>ASAP1</i>    | ArfGAP with SH3 domain, ankyrin repeat and PH domain 1               |
| 1.850  | ENSECAG00000019629 | -               | Beta-galactosidase                                                   |
| 1.846  | ENSECAG00000014267 | <i>NINJ1</i>    | ninjurin 1                                                           |
| 1.790  | ENSECAG00000002579 | <i>MATN2</i>    | matriilin 2                                                          |
| 1.780  | ENSECAG00000011435 | <i>MSI2</i>     | musashi RNA-binding protein 2                                        |
| 1.691  | ENSECAG00000012105 | <i>IGSF9B</i>   | immunoglobulin superfamily, member 9B                                |
| 1.656  | ENSECAG00000023838 | -               | -                                                                    |
| 1.626  | ENSECAG00000020760 | <i>NUP133</i>   | nucleoporin 133kDa                                                   |
| 1.594  | ENSECAG00000007574 | <i>NTM</i>      | Neurotrimin                                                          |
| 1.588  | ENSECAG00000007880 | <i>ABCA5</i>    | ATP-binding cassette, sub-family A (ABC1), member 5                  |
| 1.540  | ENSECAG00000009608 | <i>B3GALTL</i>  | beta 1,3-galactosyltransferase-like                                  |
| 1.530  | ENSECAG00000015121 | <i>ACSF3</i>    | acyl-CoA synthetase family member 3                                  |
| 1.491  | ENSECAG00000008971 | <i>LEPREL1</i>  | leprecan-like 1                                                      |
| 1.480  | ENSECAG00000010682 | <i>GNPTAB</i>   | N-acetylglucosamine-1-phosphate transferase, alpha and beta subunits |
| 1.460  | ENSECAG00000000207 | <i>ACTA1</i>    | actin, alpha 1, skeletal muscle                                      |
| 1.446  | ENSECAG00000000050 | <i>WASF3</i>    | WAS protein family, member 3                                         |
| 1.442  | ENSECAG00000013957 | <i>PDE5A</i>    | phosphodiesterase 5A, cGMP-specific                                  |
| 1.422  | ENSECAG00000006788 | <i>PCSK5</i>    | proprotein convertase subtilisin/kexin type 5                        |
| 1.404  | ENSECAG00000000711 | <i>COIL</i>     | coilin                                                               |
| 1.381  | ENSECAG00000023160 | <i>TCTN1</i>    | tectonic family member 1                                             |
| 1.371  | ENSECAG00000012556 | <i>ZC3H3</i>    | zinc finger CCCH-type containing 3                                   |
| 1.363  | ENSECAG00000011163 | <i>FCHSD2</i>   | FCH and double SH3 domains 2                                         |
| 1.347  | ENSECAG00000021446 | <i>GRID1</i>    | glutamate receptor, ionotropic, delta 1                              |
| 1.335  | ENSECAG00000020117 | <i>SLC22A15</i> | solute carrier family 22, member 15                                  |
| 1.333  | ENSECAG00000006392 | <i>SEC63</i>    | SEC63 homolog (S. cerevisiae)                                        |
| 1.330  | ENSECAG00000021760 | <i>DCC</i>      | deleted in colorectal carcinoma                                      |
| 1.326  | ENSECAG00000018233 | <i>NIPBL</i>    | Nipped-B homolog (Drosophila)                                        |
| 1.326  | ENSECAG00000021838 | -               | -                                                                    |
| 1.313  | ENSECAG00000008625 | <i>MYBPC1</i>   | myosin binding protein C, slow type                                  |
| 1.306  | ENSECAG00000017883 | <i>ABCB10</i>   | ATP-binding cassette, sub-family B (MDR/TAP), member 10              |

|       |                    |                 |                                                                         |
|-------|--------------------|-----------------|-------------------------------------------------------------------------|
| 1.303 | ENSECAG00000010657 | <i>PIK3C3</i>   | phosphatidylinositol 3-kinase, catalytic subunit type 3                 |
| 1.292 | ENSECAG00000016277 | <i>SGCD</i>     | sarcoglycan, delta (35kDa dystrophin-associated glycoprotein)           |
| 1.278 | ENSECAG00000012338 | <i>URB2</i>     | URB2 ribosome biogenesis 2 homolog (S. cerevisiae)                      |
| 1.271 | ENSECAG00000003020 | -               | -                                                                       |
| 1.271 | ENSECAG00000010509 | -               | Uncharacterized protein                                                 |
| 1.270 | ENSECAG00000009233 | <i>OPCML</i>    | opioid binding protein/cell adhesion molecule-like                      |
| 1.268 | ENSECAG00000016963 | <i>COMMD1</i>   | copper metabolism (Murr1) domain containing 1                           |
| 1.250 | ENSECAG00000012724 | <i>MAP3K4</i>   | mitogen-activated protein kinase kinase kinase 4                        |
| 1.238 | ENSECAG00000014869 | <i>PPM1D</i>    | protein phosphatase, Mg <sup>2+</sup> /Mn <sup>2+</sup> dependent, 1D   |
| 1.238 | ENSECAG00000014849 | -               | -                                                                       |
| 1.232 | ENSECAG00000018241 | <i>C15orf60</i> | chromosome 15 open reading frame 60                                     |
| 1.228 | ENSECAG00000016605 | <i>NR3C2</i>    | nuclear receptor subfamily 3, group C, member 2                         |
| 1.214 | ENSECAG00000024236 | <i>POP1</i>     | processing of precursor 1, ribonuclease P/MRP subunit (S. cerevisiae)   |
| 1.214 | ENSECAG00000009432 | <i>PDRG1</i>    | p53 and DNA-damage regulated 1                                          |
| 1.203 | ENSECAG00000017930 | <i>PHF2</i>     | PHD finger protein 2                                                    |
| 1.199 | ENSECAG00000017207 | -               | -                                                                       |
| 1.199 | ENSECAG00000022613 | <i>PPP2CA</i>   | protein phosphatase 2, catalytic subunit, alpha isozyme                 |
| 1.199 | ENSECAG00000012365 | <i>VDAC1</i>    | voltage-dependent anion channel 1                                       |
| 1.199 | ENSECAG00000019667 | <i>KLHDC4</i>   | kelch domain containing 4                                               |
| 1.196 | ENSECAG00000024479 | <i>LCLAT1</i>   | lysocardiolipin acyltransferase 1                                       |
| 1.193 | ENSECAG00000009841 | <i>AKAP1</i>    | A kinase (PRKA) anchor protein 1                                        |
| 1.190 | ENSECAG00000002769 | -               | -                                                                       |
| 1.184 | ENSECAG00000023361 | <i>RHPN1</i>    | rhopilin, Rho GTPase binding protein 1                                  |
| 1.183 | ENSECAG00000021124 | <i>PRMT3</i>    | protein arginine methyltransferase 3                                    |
| 1.181 | ENSECAG00000007481 | <i>ASTN1</i>    | astrotactin 1                                                           |
| 1.178 | ENSECAG00000023493 | <i>VPS26B</i>   | vacuolar protein sorting 26 homolog B (S. pombe)                        |
| 1.168 | ENSECAG00000024214 | <i>FANCA</i>    | Fanconi anemia, complementation group A                                 |
| 1.167 | ENSECAG00000023888 | <i>ALDH1L2</i>  | aldehyde dehydrogenase 1 family, member L2                              |
| 1.167 | ENSECAG00000008427 | <i>SLC43A1</i>  | solute carrier family 43, member 1                                      |
| 1.166 | ENSECAG00000015892 | <i>CACNA1D</i>  | calcium channel, voltage-dependent, L type, alpha 1D subunit            |
| 1.165 | ENSECAG00000007080 | <i>ALK</i>      | anaplastic lymphoma receptor tyrosine kinase                            |
| 1.161 | ENSECAG00000000323 | <i>ABCA10</i>   | ATP-binding cassette, sub-family A (ABC1), member 10                    |
| 1.159 | ENSECAG00000025396 | -               | -                                                                       |
| 1.159 | ENSECAG00000005781 | <i>SCPEP1</i>   | serine carboxypeptidase 1                                               |
| 1.156 | ENSECAG00000019990 | <i>WNK2</i>     | WNK lysine deficient protein kinase 2                                   |
| 1.156 | ENSECAG00000008495 | <i>FAF1</i>     | Fas (TNFRSF6) associated factor 1                                       |
| 1.150 | ENSECAG00000018811 | <i>ARL6IP1</i>  | ADP-ribosylation factor-like 6 interacting protein 1                    |
| 1.150 | ENSECAG00000022891 | <i>PDE4DIP</i>  | phosphodiesterase 4D interacting protein                                |
| 1.149 | ENSECAG00000015369 | <i>NID2</i>     | nidogen 2 (osteonidogen)                                                |
| 1.141 | ENSECAG00000000705 | <i>MARCH10</i>  | membrane-associated ring finger (C3HC4) 10, E3 ubiquitin protein ligase |
| 1.138 | ENSECAG00000023360 | <i>KCNK10</i>   | potassium channel, subfamily K, member 10                               |
| 1.138 | ENSECAG00000020012 | <i>KIAA0556</i> | KIAA0556                                                                |
| 1.133 | ENSECAG00000017280 | <i>MAPK10</i>   | mitogen-activated protein kinase 10                                     |
| 1.132 | ENSECAG00000015975 | <i>CNTN6</i>    | contactin 6                                                             |
| 1.130 | ENSECAG00000002321 | <i>SEC24A</i>   | SEC24 family, member A (S. cerevisiae)                                  |
| 1.130 | ENSECAG00000027254 | -               | -                                                                       |
| 1.130 | ENSECAG00000018013 | <i>CDKL3</i>    | cyclin-dependent kinase-like 3                                          |
| 1.130 | ENSECAG00000016419 | <i>UBE2B</i>    | ubiquitin-conjugating enzyme E2B                                        |
| 1.121 | ENSECAG00000016313 | <i>PTPN4</i>    | protein tyrosine phosphatase, non-receptor type 4 (megakaryocyte)       |
| 1.118 | ENSECAG00000024475 | <i>CRTC3</i>    | CREB regulated transcription coactivator 3                              |
| 1.114 | ENSECAG00000013739 | <i>DLGAP1</i>   | discs, large (Drosophila) homolog-associated protein 1                  |
| 1.104 | ENSECAG00000003504 | -               | -                                                                       |
| 1.104 | ENSECAG00000011286 | -               | -                                                                       |
| 1.101 | ENSECAG00000016684 | <i>NUMB</i>     | numb homolog (Drosophila)                                               |
| 1.098 | ENSECAG00000007889 | -               | Uncharacterized protein                                                 |
| 1.096 | ENSECAG00000023832 | <i>GAK</i>      | cyclin G associated kinase                                              |
| 1.096 | ENSECAG00000018382 | <i>COL22A1</i>  | collagen, type XXII, alpha 1                                            |
| 1.094 | ENSECAG00000019890 | <i>VRK1</i>     | vaccinia related kinase 1                                               |
| 1.086 | ENSECAG00000011570 | -               | Uncharacterized protein                                                 |
| 1.081 | ENSECAG00000018366 | <i>JPH3</i>     | junctionhilin 3                                                         |
| 1.080 | ENSECAG00000007262 | <i>EEA1</i>     | early endosome antigen 1                                                |
| 1.075 | ENSECAG00000015151 | -               | -                                                                       |



|       |                    |                 |                                                                 |
|-------|--------------------|-----------------|-----------------------------------------------------------------|
| 1.075 | ENSECAG00000015522 | -               | -                                                               |
| 1.075 | ENSECAG00000026144 | -               | -                                                               |
| 1.067 | ENSECAG00000019952 | <i>TRIO</i>     | trio Rho guanine nucleotide exchange factor                     |
| 1.063 | ENSECAG00000017222 | <i>LMF1</i>     | lipase maturation factor 1                                      |
| 1.051 | ENSECAG00000012543 | <i>C-SKI</i>    | ski oncogene                                                    |
| 1.047 | ENSECAG00000004789 | -               | -                                                               |
| 1.047 | ENSECAG00000001970 | -               | -                                                               |
| 1.047 | ENSECAG00000001912 | -               | -                                                               |
| 1.047 | ENSECAG00000008665 | <i>FOXJ3</i>    | forkhead box J3                                                 |
| 1.046 | ENSECAG00000001926 | <i>FBXO31</i>   | F-box protein 31                                                |
| 1.043 | ENSECAG00000016835 | <i>STXBP6</i>   | syntaxin binding protein 6 (amisyn)                             |
| 1.042 | ENSECAG00000023789 | <i>AMBRA1</i>   | autophagy/beclin-1 regulator 1                                  |
| 1.038 | ENSECAG00000025159 | <i>DNAH9</i>    | dynein, axonemal, heavy chain 9                                 |
| 1.038 | ENSECAG00000009860 | <i>STAB1</i>    | stabilin 1                                                      |
| 1.038 | ENSECAG00000015835 | <i>NT5DC2</i>   | 5'-nucleotidase domain containing 2                             |
| 1.034 | ENSECAG00000011659 | <i>KIAA1549</i> | KIAA1549                                                        |
| 1.034 | ENSECAG00000022937 | -               | -                                                               |
| 1.032 | ENSECAG00000003931 | <i>SKP1</i>     | S-phase kinase-associated protein 1                             |
| 1.032 | ENSECAG00000027356 | -               | -                                                               |
| 1.029 | ENSECAG00000022378 | <i>IGSF3</i>    | immunoglobulin superfamily, member 3                            |
| 1.028 | ENSECAG00000024820 | <i>PHF20</i>    | PHD finger protein 20                                           |
| 1.027 | ENSECAG00000023415 | <i>PSMB7</i>    | proteasome (prosome, macropain) subunit, beta type, 7           |
| 1.026 | ENSECAG00000017284 | <i>ANKDD1A</i>  | ankyrin repeat and death domain containing 1A                   |
| 1.022 | ENSECAG00000006519 | <i>SMG6</i>     | smg-6 homolog, nonsense mediated mRNA decay factor (C. elegans) |
| 1.019 | ENSECAG00000010370 | <i>CDK5RAP1</i> | CDK5 regulatory subunit associated protein 1                    |
| 1.014 | ENSECAG00000002746 | <i>BRAF</i>     | v-raf murine sarcoma viral oncogene homolog B1                  |
| 1.013 | ENSECAG00000014312 | <i>PRKCZ</i>    | protein kinase C, zeta                                          |
| 1.011 | ENSECAG00000019584 | -               | -                                                               |
| 1.011 | ENSECAG00000018370 | <i>NCAPD3</i>   | non-SMC condensin II complex, subunit D3                        |
| 1.011 | ENSECAG00000011007 | <i>ACAD8</i>    | acyl-CoA dehydrogenase family, member 8                         |
| 1.011 | ENSECAG0000001596  | <i>THYN1</i>    | thymocyte nuclear protein 1                                     |
| 1.011 | ENSECAG00000026872 | -               | -                                                               |
| 1.011 | ENSECAG00000015550 | <i>JAM3</i>     | junctional adhesion molecule 3                                  |

**Supplementary Table S42. Weighted selection of candidate genes (weight > 1)**

Please see SI Dataset 1.

**Supplementary Table S43. Weighted and un-weighted selection of candidate genes**

| Annotation                      | q-value  | # Molecules | Categories                                                                                                                    |
|---------------------------------|----------|-------------|-------------------------------------------------------------------------------------------------------------------------------|
| endometrioid carcinoma          | 3.28E-03 | 38          | Cancer                                                                                                                        |
| aneuploidy of breast cell lines | 1.82E-02 | 2           | Cell Cycle; Reproductive System Development and Function                                                                      |
| Cancer                          | 1.82E-02 | 71          | Cancer                                                                                                                        |
| colon cancer                    | 1.82E-02 | 38          | Cancer; Gastrointestinal Disease                                                                                              |
| colon carcinoma                 | 1.82E-02 | 36          | Cancer; Gastrointestinal Disease                                                                                              |
| colorectal cancer               | 1.82E-02 | 41          | Cancer; Gastrointestinal Disease                                                                                              |
| development of telencephalon    | 1.82E-02 | 6           | Embryonic Development; Nervous System Development and Function; Organ Development; Organismal Development; Tissue Development |
| gastrointestinal carcinoma      | 1.82E-02 | 37          | Cancer; Gastrointestinal Disease                                                                                              |

|                                          |          |    |                                                                                 |
|------------------------------------------|----------|----|---------------------------------------------------------------------------------|
| gastrointestinal tract cancer            | 1.82E-02 | 44 | Cancer; Gastrointestinal Disease                                                |
| digestive organ tumor                    | 2.88E-02 | 45 | Cancer; Gastrointestinal Disease                                                |
| accumulation of lysobisphosphatidic acid | 3.94E-02 | 2  | Lipid Metabolism; Molecular Transport; Small Molecule Biochemistry              |
| recognition of neurons                   | 3.94E-02 | 2  | Nervous System Development and Function; Cell-To-Cell Signaling and Interaction |
| breast or colorectal cancer              | 4.40E-02 | 46 | Cancer                                                                          |

**Supplementary Table S44. Enriched functions in genes with a weight > 1**

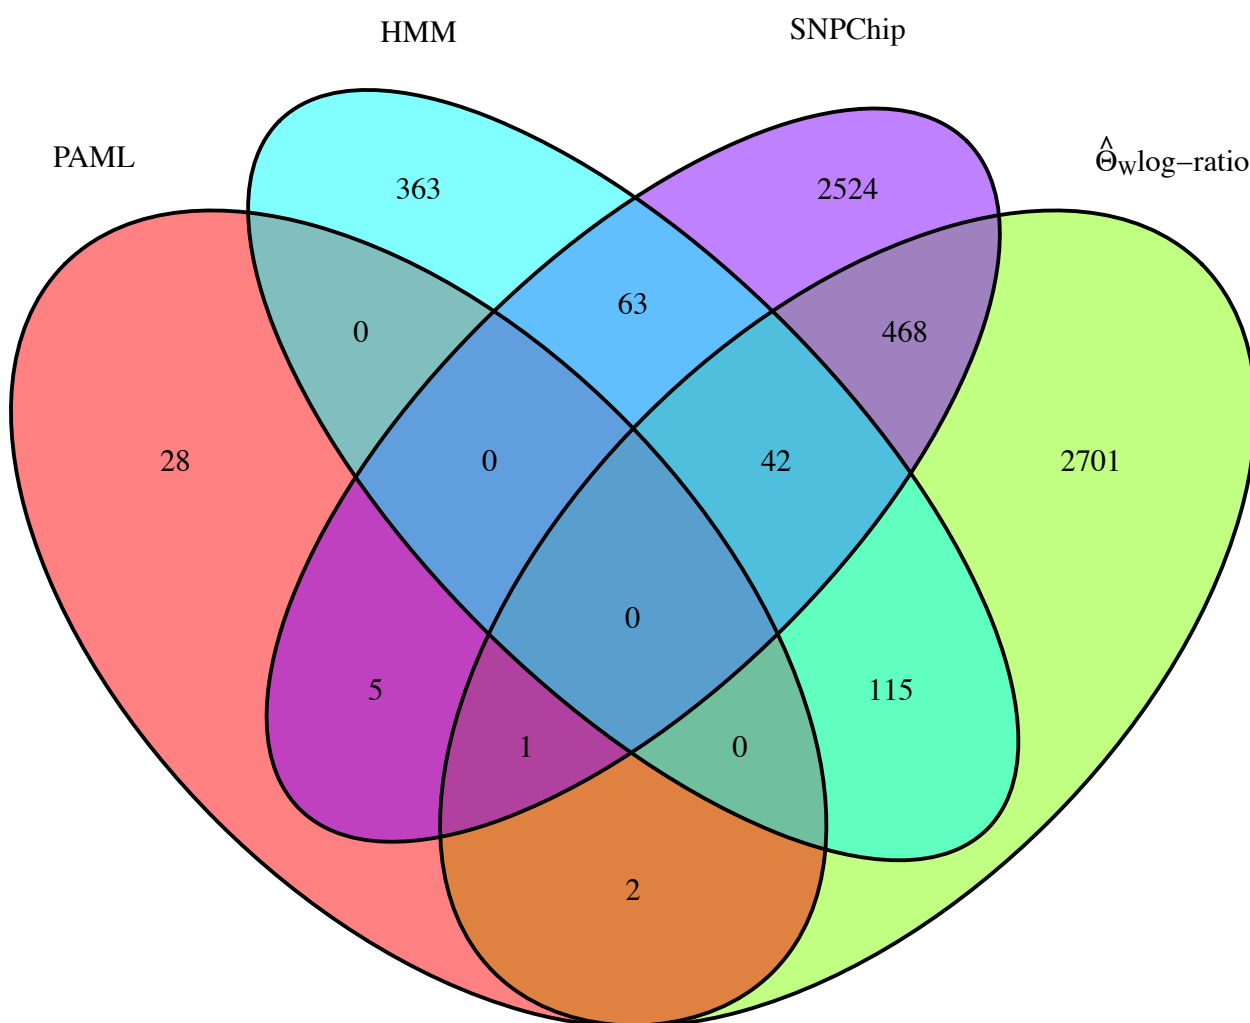

**Supplementary Figure S59. Venn diagram of genes detected by method category**

| Annotation                            | q-value  | # Molecules | Category                                                                                  |
|---------------------------------------|----------|-------------|-------------------------------------------------------------------------------------------|
| adenocarcinoma                        | 1.41E-04 | 186         | Cancer                                                                                    |
| breast or colorectal cancer           | 1.41E-04 | 182         | Cancer                                                                                    |
| Cancer                                | 1.41E-04 | 288         | Cancer                                                                                    |
| carcinoma                             | 1.41E-04 | 235         | Cancer                                                                                    |
| colon adenocarcinoma                  | 1.41E-04 | 128         | Cancer; Gastrointestinal Disease                                                          |
| colon cancer                          | 1.41E-04 | 141         | Cancer; Gastrointestinal Disease                                                          |
| colon carcinoma                       | 1.41E-04 | 134         | Cancer; Gastrointestinal Disease                                                          |
| endometrioid carcinoma                | 1.41E-04 | 124         | Cancer                                                                                    |
| gastrointestinal adenocarcinoma       | 1.41E-04 | 131         | Cancer; Gastrointestinal Disease                                                          |
| gastrointestinal carcinoma            | 1.41E-04 | 138         | Cancer; Gastrointestinal Disease                                                          |
| solid tumor                           | 1.41E-04 | 237         | Cancer                                                                                    |
| epithelial neoplasia                  | 1.76E-04 | 242         | Cancer                                                                                    |
| gastrointestinal tract cancer         | 1.80E-04 | 162         | Cancer; Gastrointestinal Disease                                                          |
| colorectal cancer                     | 2.58E-04 | 152         | Cancer; Gastrointestinal Disease                                                          |
| digestive organ tumor                 | 1.77E-03 | 168         | Cancer; Gastrointestinal Disease                                                          |
| malignant neoplasm of abdomen         | 3.25E-03 | 185         | Cancer                                                                                    |
| morphology of artery                  | 1.92E-02 | 14          | Cardiovascular System Development and Function; Organismal Development; Tissue Morphology |
| recurrent medullary thyroid carcinoma | 3.69E-02 | 5           | Cancer; Endocrine System Disorders                                                        |
| scattered medullary thyroid carcinoma | 3.69E-02 | 5           | Cancer; Endocrine System Disorders                                                        |
| hypobetalipoproteinemia               | 3.78E-02 | 3           | Developmental Disorder; Hematological Disease; Hereditary Disorder; Metabolic Disease     |
| advanced rectal cancer                | 4.23E-02 | 5           | Cancer; Gastrointestinal Disease                                                          |
| astrocytoma                           | 4.26E-02 | 26          | Cancer; Neurological Disease                                                              |
| development of central nervous system | 4.84E-02 | 34          | Nervous System Development and Function                                                   |
| hypolipoproteinemia                   | 4.84E-02 | 4           | Metabolic Disease                                                                         |

**Supplementary Table S45. Enriched functions in genes detected by more than one method**

## References

1. Orlando L, *et al.* (2013) Recalibrating Equus evolution using the genome sequence of an early Middle Pleistocene horse. *Nature* 499(7456):74-78.
2. Andersson LS, *et al.* (2012) Mutations in DMRT3 affect locomotion in horses and spinal circuit function in mice. *Nature* 488(7413):642-646.
3. Wade CM, *et al.* (2009) Genome sequence, comparative analysis, and population genetics of the domestic horse. *Science* 326(5954):865-867.
4. Stuiver M & Reimer PJ (1993) Extended C-14 Data-Base And Revised CALIB 3.0 C-14 Age Calibration Program. *Radiocarbon* 35(1):215-230.
5. Outram AK, *et al.* (2009) The earliest horse harnessing and milking. *Science* 323(5919):1332-1335.
6. Seguin-Orlando A, *et al.* (2013) Ligation bias in illumina next-generation DNA libraries: implications for sequencing ancient genomes. *PloS one* 8(10):e78575.
7. Der Sarkissian C, *et al.* (2014) Shotgun Microbial Profiling of Fossil Remains. *Molecular Ecology*:n/a-n/a.
8. Meyer M & Kircher M (2010) Illumina sequencing library preparation for highly multiplexed target capture and sequencing. *Cold Spring Harbor protocols* 2010(6):pdb prot5448.
9. Pedersen JS, *et al.* (2014) Genome-wide nucleosome map and cytosine methylation levels of an ancient human genome. *Genome research* 24(3):454-466.
10. Schubert M, *et al.* (2014) Characterization of ancient and modern genomes by sequencing, SNP detection, phylogenomic and metagenomic analysis. *Nature protocols* 9(5):1056-1082.
11. Lindgreen S (2012) AdapterRemoval: easy cleaning of next-generation sequencing reads. *BMC research notes* 5:337.
12. Li H & Durbin R (2009) Fast and accurate short read alignment with Burrows-Wheeler transform. *Bioinformatics* 25(14):1754-1760.
13. Schubert M, *et al.* (2012) Improving ancient DNA read mapping against modern reference genomes. *BMC genomics* 13:178.
14. McKenna A, *et al.* (2010) The Genome Analysis Toolkit: a MapReduce framework for analyzing next-generation DNA sequencing data. *Genome research* 20(9):1297-1303.
15. Li H, *et al.* (2009) The Sequence Alignment/Map format and SAMtools. *Bioinformatics* 25(16):2078-2079.
16. Briggs AW, *et al.* (2007) Patterns of damage in genomic DNA sequences from a Neandertal. *Proceedings of the National Academy of Sciences of the United States of America* 104(37):14616-14621.
17. Jónsson H, Ginolhac A, Schubert M, Johnson PL, & Orlando L (2013) mapDamage2.0: fast approximate Bayesian estimates of ancient DNA damage parameters. *Bioinformatics* 29(13):1682-1684.
18. Watterson GA (1975) On the number of segregating sites in genetical models without recombination. *Theoretical population biology* 7(2):256-276.
19. McLaren W, *et al.* (2010) Deriving the consequences of genomic variants with the Ensembl API and SNP Effect Predictor. *Bioinformatics* 26(16):2069-2070.
20. Quinlan AR & Hall IM (2010) BEDTools: a flexible suite of utilities for comparing genomic features. *Bioinformatics* 26(6):841-842.
21. Der Sarkissian C, *et al.* (2014) Shotgun Microbial Profiling of Fossil Remains. *Mol Ecol* 23(7):1780-1798.
22. Segata N, *et al.* (2012) Metagenomic microbial community profiling using unique clade-specific marker genes. *Nature methods* 9(8):811-814.
23. Langmead B & Salzberg SL (2012) Fast gapped-read alignment with Bowtie 2. *Nature methods* 9(4):357-359.

24. Green RE, *et al.* (2010) A draft sequence of the Neandertal genome. *Science* 328(5979):710-722.
25. Quail MA, *et al.* (2008) A large genome center's improvements to the Illumina sequencing system. *Nature methods* 5(12):1005-1010.
26. R-Core-Team (2013) *R: A Language and Environment for Statistical Computing*.
27. Suzuki R & Shimodaira H (2006) Pvcust: an R package for assessing the uncertainty in hierarchical clustering. *Bioinformatics* 22(12):1540-1542.
28. Fierer N, *et al.* (2012) Cross-biome metagenomic analyses of soil microbial communities and their functional attributes. *Proceedings of the National Academy of Sciences of the United States of America* 109(52):21390-21395.
29. Consortium HMP (2012) Structure, function and diversity of the healthy human microbiome. *Nature* 486(7402):207-214.
30. Sawyer S, Krause J, Guschanski K, Savolainen V, & Paabo S (2012) Temporal patterns of nucleotide misincorporations and DNA fragmentation in ancient DNA. *PloS one* 7(3):e34131.
31. Keane TM, Creevey CJ, Pentony MM, Naughton TJ, & McLnerney JO (2006) Assessment of methods for amino acid matrix selection and their use on empirical data shows that ad hoc assumptions for choice of matrix are not justified. *BMC evolutionary biology* 6:29.
32. Huelsenbeck JP & Ronquist F (2001) MRBAYES: Bayesian inference of phylogenetic trees. *Bioinformatics* 17(8):754-755.
33. Tamura K, *et al.* (2011) MEGA5: molecular evolutionary genetics analysis using maximum likelihood, evolutionary distance, and maximum parsimony methods. *Molecular biology and evolution* 28(10):2731-2739.
34. Wallner B, *et al.* (2013) Identification of genetic variation on the horse y chromosome and the tracing of male founder lineages in modern breeds. *PloS one* 8(4):e60015.
35. Lippold S, *et al.* (2011) Discovery of lost diversity of paternal horse lineages using ancient DNA. *Nature communications* 2:450.
36. Librado P & Rozas J (2009) DnaSP v5: a software for comprehensive analysis of DNA polymorphism data. *Bioinformatics* 25(11):1451-1452.
37. Bandelt HJ, Forster P, & Rohl A (1999) Median-joining networks for inferring intraspecific phylogenies. *Molecular biology and evolution* 16(1):37-48.
38. McCue ME, *et al.* (2012) A high density SNP array for the domestic horse and extant *Perissodactyla*: Utility for association mapping, genetic diversity, and phylogeny studies. *PLoS Genet* 8(1):e1002451.
39. Petersen JL, *et al.* (2013) Genome-wide analysis reveals selection for important traits in domestic horse breeds. *PLoS Genet* 9(1):e1003211.
40. Purcell S, *et al.* (2007) PLINK: a tool set for whole-genome association and population-based linkage analyses. *American journal of human genetics* 81(3):559-575.
41. Patterson N, Price AL, & Reich D (2006) Population structure and eigenanalysis. *PLoS Genet* 2(12):e190.
42. Dixon P (2003) VEGAN, a package of R functions for community ecology. *Journal of Vegetation Science* 14(6):927-930.
43. Doan R, *et al.* (2012) Whole-genome sequencing and genetic variant analysis of a Quarter Horse mare. *BMC genomics* 13:78.
44. Nicholas FW (2003) Online Mendelian Inheritance in Animals (OMIA): a comparative knowledgebase of genetic disorders and other familial traits in non-laboratory animals. *Nucleic acids research* 31(1):275-277.
45. Signer-Hasler H, *et al.* (2012) A genome-wide association study reveals loci influencing height and other conformation traits in horses. *PloS one* 7(5):e37282.
46. Pruvost M, *et al.* (2011) Genotypes of predomestic horses match phenotypes painted in Paleolithic works of cave art. *Proceedings of the National Academy of Sciences of the United States of America* 108(46):18626-18630.

47. Bellone RR, *et al.* (2013) Evidence for a retroviral insertion in TRPM1 as the cause of congenital stationary night blindness and leopard complex spotting in the horse. *PLoS one* 8(10):e78280.
48. Hill EW, Gu J, McGivney BA, & MacHugh DE (2010) Targets of selection in the Thoroughbred genome contain exercise-relevant gene SNPs associated with elite racecourse performance. *Animal genetics* 41 Suppl 2:56-63.
49. Bellone RR, *et al.* (2010) Fine-mapping and mutation analysis of TRPM1: a candidate gene for leopard complex (LP) spotting and congenital stationary night blindness in horses. *Briefings in functional genomics* 9(3):193-207.
50. Tryon RC, White SD, & Bannasch DL (2007) Homozygosity mapping approach identifies a missense mutation in equine cyclophilin B (PPIB) associated with HERDA in the American Quarter Horse. *Genomics* 90(1):93-102.
51. Brooks SA, *et al.* (2010) Whole-genome SNP association in the horse: identification of a deletion in myosin Va responsible for Lavender Foal Syndrome. *PLoS Genet* 6(4):e1000909.
52. Brault LS, Cooper CA, Famula TR, Murray JD, & Penedo MC (2011) Mapping of equine cerebellar abiotrophy to ECA2 and identification of a potential causative mutation affecting expression of MUTYH. *Genomics* 97(2):121-129.
53. Marklund L, Moller MJ, Sandberg K, & Andersson L (1996) A missense mutation in the gene for melanocyte-stimulating hormone receptor (MC1R) is associated with the chestnut coat color in horses. *Mammalian genome : official journal of the International Mammalian Genome Society* 7(12):895-899.
54. Wagner HJ & Reissmann M (2000) New polymorphism detected in the horse MC1R gene. *Animal genetics* 31(4):289-290.
55. Brooks SA & Bailey E (2005) Exon skipping in the KIT gene causes a Sabino spotting pattern in horses. *Mammalian genome : official journal of the International Mammalian Genome Society* 16(11):893-902.
56. Brooks SA, Lear TL, Adelson DL, & Bailey E (2007) A chromosome inversion near the KIT gene and the Tobiano spotting pattern in horses. *Cytogenetic and genome research* 119(3-4):225-230.
57. Makvandi-Nejad S, *et al.* (2012) Four loci explain 83% of size variation in the horse. *PLoS one* 7(7):e39929.
58. Wijnberg ID, *et al.* (2012) A missense mutation in the skeletal muscle chloride channel 1 (CLCN1) as candidate causal mutation for congenital myotonia in a New Forest pony. *Neuromuscular disorders : NMD* 22(4):361-367.
59. Spirito F, *et al.* (2002) Animal models for skin blistering conditions: absence of laminin 5 causes hereditary junctional mechanobullous disease in the Belgian horse. *The Journal of investigative dermatology* 119(3):684-691.
60. Hauswirth R, *et al.* (2012) Mutations in MITF and PAX3 cause "splashed white" and other white spotting phenotypes in horses. *PLoS Genet* 8(4):e1002653.
61. Hauswirth R, *et al.* (2013) Novel variants in the KIT and PAX3 genes in horses with white-spotted coat colour phenotypes. *Animal genetics* 44(6):763-765.
62. Brunberg E, *et al.* (2006) A missense mutation in PMEL17 is associated with the Silver coat color in the horse. *BMC genetics* 7:46.
63. Graves KT, Henney PJ, & Ennis RB (2009) Partial deletion of the LAMA3 gene is responsible for hereditary junctional epidermolysis bullosa in the American Saddlebred Horse. *Animal genetics* 40(1):35-41.
64. Shin EK, Perryman LE, & Meek K (1997) A kinase-negative mutation of DNA-PK(CS) in equine SCID results in defective coding and signal joint formation. *J Immunol* 158(8):3565-3569.
65. Aleman M, *et al.* (2004) Association of a mutation in the ryanodine receptor 1 gene with equine malignant hyperthermia. *Muscle & nerve* 30(3):356-365.

66. Gu J, *et al.* (2010) Association of sequence variants in CKM (creatine kinase, muscle) and COX4I2 (cytochrome c oxidase, subunit 4, isoform 2) genes with racing performance in Thoroughbred horses. *Equine veterinary journal. Supplement* (38):569-575.
67. Cannon SC, Hayward LJ, Beech J, & Brown RH, Jr. (1995) Sodium channel inactivation is impaired in equine hyperkalemic periodic paralysis. *Journal of neurophysiology* 73(5):1892-1899.
68. Christopherson PW, van Santen VL, Livesey L, & Boudreaux MK (2007) A 10-base-pair deletion in the gene encoding platelet glycoprotein IIb associated with Glanzmann thrombasthenia in a horse. *Journal of veterinary internal medicine / American College of Veterinary Internal Medicine* 21(1):196-198.
69. Orr N, *et al.* (2010) Genome-wide SNP association-based localization of a dwarfism gene in Friesian dwarf horses. *Animal genetics* 41 Suppl 2:2-7.
70. Cook D, Brooks S, Bellone R, & Bailey E (2008) Missense mutation in exon 2 of SLC36A1 responsible for champagne dilution in horses. *PLoS Genet* 4(9):e1000195.
71. Hansen M, Knorr C, Hall AJ, Broad TE, & Brenig B (2007) Sequence analysis of the equine SLC26A2 gene locus on chromosome 14q15-->q21. *Cytogenetic and genome research* 118(1):55-62.
72. Yang GC, *et al.* (1998) A dinucleotide mutation in the endothelin-B receptor gene is associated with lethal white foal syndrome (LWFS); a horse variant of Hirschsprung disease. *Human molecular genetics* 7(6):1047-1052.
73. Tozaki T, *et al.* (2010) A genome-wide association study for racing performances in Thoroughbreds clarifies a candidate region near the MSTN gene. *Animal genetics* 41 Suppl 2:28-35.
74. Hill EW, *et al.* (2012) MSTN genotype (g.66493737C/T) association with speed indices in Thoroughbred racehorses. *J Appl Physiol* (1985) 112(1):86-90.
75. Mariat D, Taourit S, & Guerin G (2003) A mutation in the MATP gene causes the cream coat colour in the horse. *Genetics, selection, evolution : GSE* 35(1):119-133.
76. Rieder S, Taourit S, Mariat D, Langlois B, & Guerin G (2001) Mutations in the agouti (ASIP), the extension (MC1R), and the brown (TYRP1) loci and their association to coat color phenotypes in horses (*Equus caballus*). *Mammalian genome : official journal of the International Mammalian Genome Society* 12(6):450-455.
77. Fox-Clipsham LY, *et al.* (2011) Identification of a mutation associated with fatal Foal Immunodeficiency Syndrome in the Fell and Dales pony. *PLoS Genet* 7(7):e1002133.
78. Revay T, Villagomez DA, Brewer D, Chenier T, & King WA (2012) GTG mutation in the start codon of the androgen receptor gene in a family of horses with 64,XY disorder of sex development. *Sexual development : genetics, molecular biology, evolution, endocrinology, embryology, and pathology of sex determination and differentiation* 6(1-3):108-116.
79. Towers RE, *et al.* (2013) A Nonsense Mutation in the IKBKG Gene in Mares with Incontinentia Pigmenti. *PLoS one* 8(12):e81625.
80. Flicek P, *et al.* (2013) Ensembl 2013. *Nucleic acids research* 41(Database issue):D48-55.
81. Sharon N (1986) IUPAC-IUB Joint Commission on Biochemical Nomenclature (JCBN). Nomenclature of glycoproteins, glycopeptides and peptidoglycans. Recommendations 1985. *European journal of biochemistry / FEBS* 159(1):1-6.
82. Stamatakis A (2006) RAxML-VI-HPC: maximum likelihood-based phylogenetic analyses with thousands of taxa and mixed models. *Bioinformatics* 22(21):2688-2690.
83. Sanderson MJ (2003) r8s: inferring absolute rates of molecular evolution and divergence times in the absence of a molecular clock. *Bioinformatics* 19(2):301-302.
84. Durand EY, Patterson N, Reich D, & Slatkin M (2011) Testing for ancient admixture between closely related populations. *Molecular biology and evolution* 28(8):2239-2252.
85. Busing FTA, Meijer E, & Leeden R (1999) Delete-m Jackknife for Unequal m. *Statistics and Computing* 9(1):3-8.
86. Cahill JA, *et al.* (2013) Genomic evidence for island population conversion resolves conflicting theories of polar bear evolution. *PLoS Genet* 9(3):e1003345.

87. Rasmussen M, *et al.* (2011) An Aboriginal Australian genome reveals separate human dispersals into Asia. *Science* 334(6052):94-98.
88. Danecek P, *et al.* (2011) The variant call format and VCFtools. *Bioinformatics* 27(15):2156-2158.
89. Pickrell JK & Pritchard JK (2012) Inference of population splits and mixtures from genome-wide allele frequency data. *PLoS Genet* 8(11):e1002967.
90. Csilléry K, François O, & Blum MGB (2012) abc: an R package for approximate Bayesian computation (ABC). *Methods in Ecology and Evolution* 3(3):475-479.
91. Achilli A, *et al.* (2012) Mitochondrial genomes from modern horses reveal the major haplogroups that underwent domestication. *Proc. Natl. Acad. Sci.* 109(7):2449-2454.
92. Excoffier L, Dupanloup I, Huerta-Sanchez E, Sousa VC, & Foll M (2013) Robust demographic inference from genomic and SNP data. *PLoS Genet* 9(10):e1003905.
93. Gutenkunst RN, Hernandez RD, Williamson SH, & Bustamante CD (2009) Inferring the joint demographic history of multiple populations from multidimensional SNP frequency data. *PLoS Genet* 5(10):e1000695.
94. Li H & Durbin R (2011) Inference of human population history from individual whole-genome sequences. *Nature* 475(7357):493-496.
95. Karolchik D, *et al.* (2014) The UCSC Genome Browser database: 2014 update. *Nucleic acids research* 42(Database issue):D764-770.
96. Cooper GM, *et al.* (2005) Distribution and intensity of constraint in mammalian genomic sequence. *Genome research* 15(7):901-913.
97. Davydov EV, *et al.* (2010) Identifying a high fraction of the human genome to be under selective constraint using GERP++. *PLoS computational biology* 6(12):e1001025.
98. Wang K, Li M, & Hakonarson H (2010) ANNOVAR: functional annotation of genetic variants from high-throughput sequencing data. *Nucleic acids research* 38(16):e164.
99. Cruz F, Vila C, & Webster MT (2008) The legacy of domestication: accumulation of deleterious mutations in the dog genome. *Molecular biology and evolution* 25(11):2331-2336.
100. Moray C, Lanfear R, & Bromham L (2014) Domestication and the mitochondrial genome: comparing patterns and rates of molecular evolution in domesticated mammals and birds and their wild relatives. *Genome biology and evolution* 6(1):161-169.
101. Nabholz B, *et al.* (2014) Transcriptome population genomics reveals severe bottleneck and domestication cost in the African rice (*Oryza glaberrima*). *Mol Ecol* 23(9):2210-2227.
102. Lu J, *et al.* (2006) The accumulation of deleterious mutations in rice genomes: a hypothesis on the cost of domestication. *Trends in genetics : TIG* 22(3):126-131.
103. Koenig D, *et al.* (2013) Comparative transcriptomics reveals patterns of selection in domesticated and wild tomato. *Proceedings of the National Academy of Sciences of the United States of America* 110(28):E2655-2662.
104. Rokas A (2009) The effect of domestication on the fungal proteome. *Trends in genetics : TIG* 25(2):60-63.
105. Lau AN, *et al.* (2009) Horse domestication and conservation genetics of Przewalski's horse inferred from sex chromosomal and autosomal sequences. *Molecular biology and evolution* 26(1):199-208.
106. Prüfer K, *et al.* (2014) The complete genome sequence of a Neanderthal from the Altai Mountains. *Nature* 505(7481):43-49.
107. Cieslak M, *et al.* (2010) Origin and history of mitochondrial DNA lineages in domestic horses. *PLoS one* 5(12):e15311.
108. Wakefield S, Knowles J, Zimmermann W, & Van Dierendonck M (2002) Status and action plan for the Przewalski's horse (*Equus ferus przewalskii*). *Equids: Zebras, Asses and Horses - Status Survey and Conservation Action Plan* (IUCN, Gland, Switzerland and Cambridge, UK), pp p82-92.
109. Yang Z (2007) PAML 4: phylogenetic analysis by maximum likelihood. *Molecular biology and evolution* 24(8):1586-1591.



110. Sandve GK, Ferkingstad E, & Nygard S (2011) Sequential Monte Carlo multiple testing. *Bioinformatics* 27(23):3235-3241.
111. Amaral AJ, *et al.* (2011) Genome-wide footprints of pig domestication and selection revealed through massive parallel sequencing of pooled DNA. *PloS one* 6(4):e14782.
112. Luciano M, *et al.* (2012) Longevity candidate genes and their association with personality traits in the elderly. *American journal of medical genetics. Part B, Neuropsychiatric genetics : the official publication of the International Society of Psychiatric Genetics* 159B(2):192-200.
113. Lopez LM, *et al.* (2012) Evolutionary conserved longevity genes and human cognitive abilities in elderly cohorts. *European journal of human genetics : EJHG* 20(3):341-347.
114. Tajima F (1989) Statistical method for testing the neutral mutation hypothesis by DNA polymorphism. *Genetics* 123(3):585-595.
115. Korneliussen TS, Moltke I, Albrechtsen A, & Nielsen R (2013) Calculation of Tajima's D and other neutrality test statistics from low depth next-generation sequencing data. *BMC bioinformatics* 14:289.
116. Nielsen R, *et al.* (2005) A scan for positively selected genes in the genomes of humans and chimpanzees. *PLoS biology* 3(6):e170.
117. Aasland M, Klungland H, & Lien S (2000) Two polymorphisms in the bovine mast cell growth factor gene (MGF). *Animal genetics* 31(5):345.
118. Lindahl T (1993) Instability and decay of the primary structure of DNA. *Nature* 362(6422):709-715.
119. Prüfer K, *et al.* (2012) The bonobo genome compared with the chimpanzee and human genomes. *Nature* 486(7404):527-531.
120. Dumont BL & Payseur BA (2008) Evolution of the genomic rate of recombination in mammals. *Evolution* 62(2):276-294.
121. Durbin R, Eddy S, Krogh A, & Graeme Mitchison S (1998) *Biological sequence analysis: probabilistic models of proteins and nucleic acids* (Cambridge University Press, Cambridge, UK).
122. Curwen V, *et al.* (2004) The Ensembl automatic gene annotation system. *Genome Res.* 14(5):942-950.
123. Huang da W, Sherman BT, & Lempicki RA (2009) Systematic and integrative analysis of large gene lists using DAVID bioinformatics resources. *Nature protocols* 4(1):44-57.
124. Huang da W, Sherman BT, & Lempicki RA (2009) Bioinformatics enrichment tools: paths toward the comprehensive functional analysis of large gene lists. *Nucleic acids research* 37(1):1-13.
125. Behrends C, Sowa ME, Gygi SP, & Harper JW (2010) Network organization of the human autophagy system. *Nature* 466(7302):68-76.
126. Zuko A, *et al.* (2013) Contactins in the neurobiology of autism. *Eur. J. Pharmacol.* 719(1-3):63-74.
127. Takeda Y, *et al.* (2003) Impaired motor coordination in mice lacking neural recognition molecule NB-3 of the contactin/F3 subgroup. *J. Neurobiol.* 56(3):252-265.
128. Hill EW, Katz LM, & MacHugh DE (2013) Genomics of performance. *Equine Genomics*, ed Chowdhary BP (Wiley-Blackwell, Oxford, UK), pp 265-283.
